# Supplementary figures and images for: Generative power of a protein language model trained on multiple sequence alignments
Source: eLife journal article supplement (doi:10.7554/elife.79854), 2023-02-03

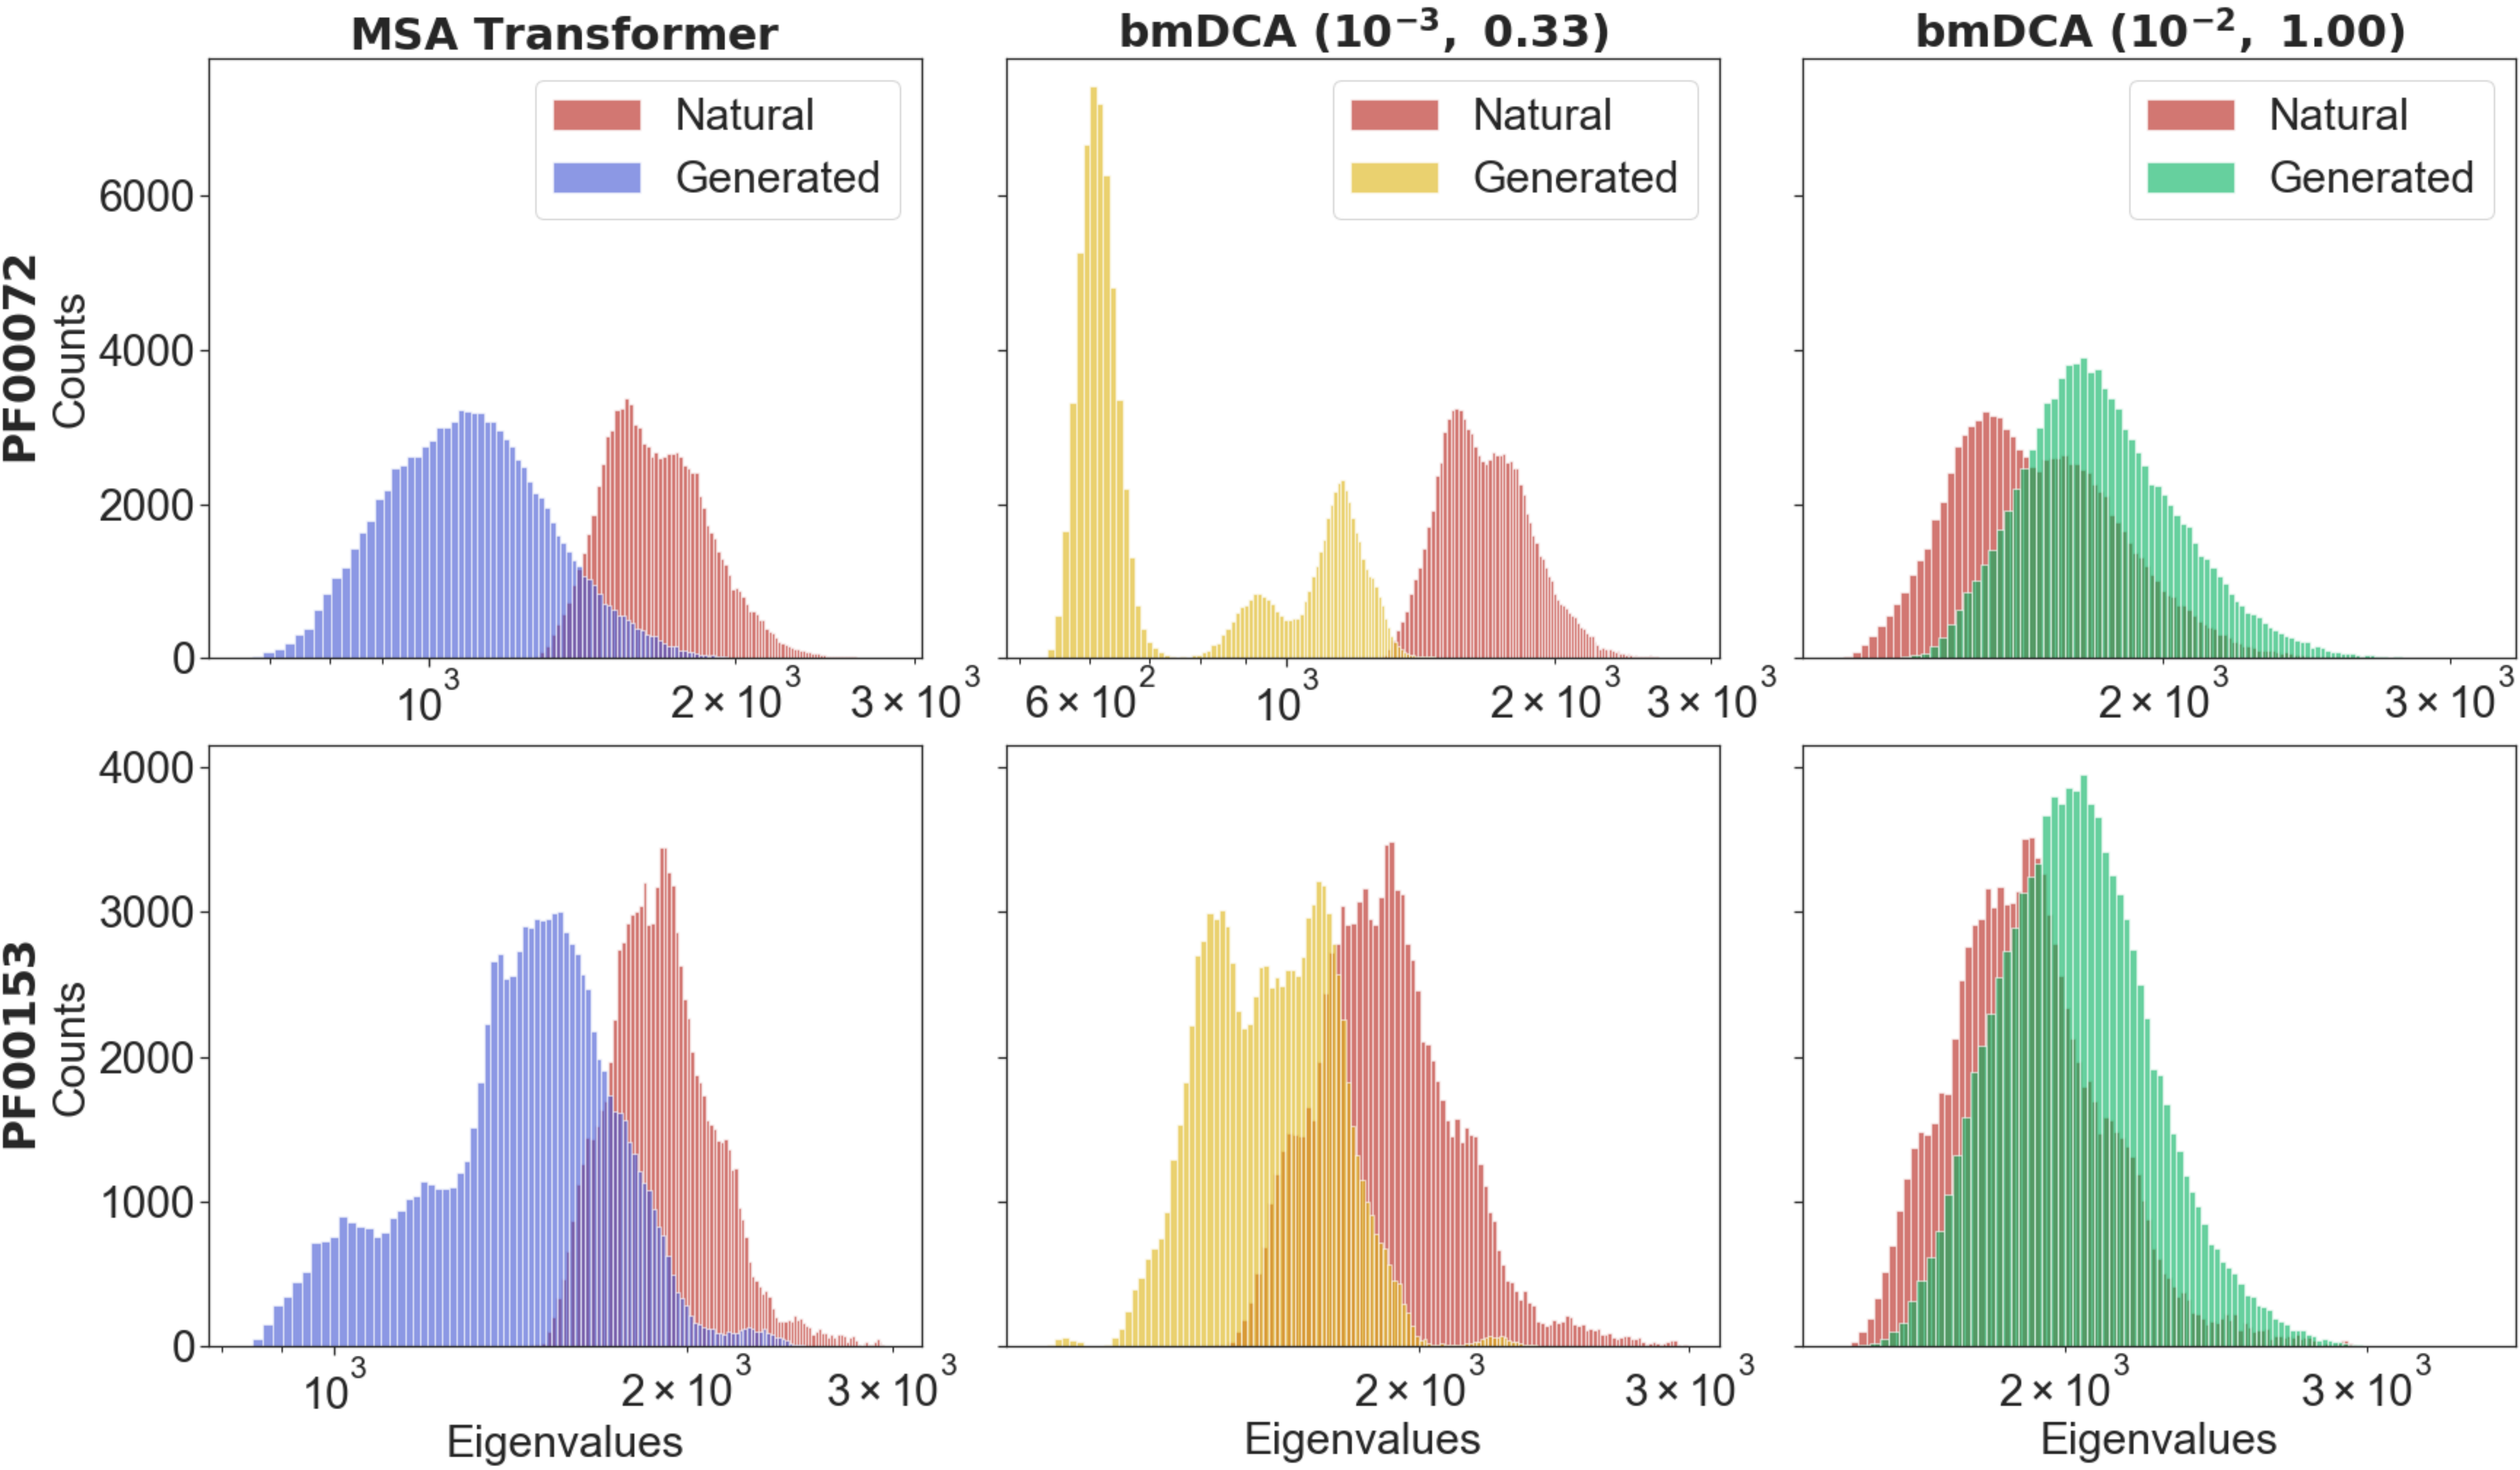

Supplement: supp [file elife-79854-supp-v1.zip]

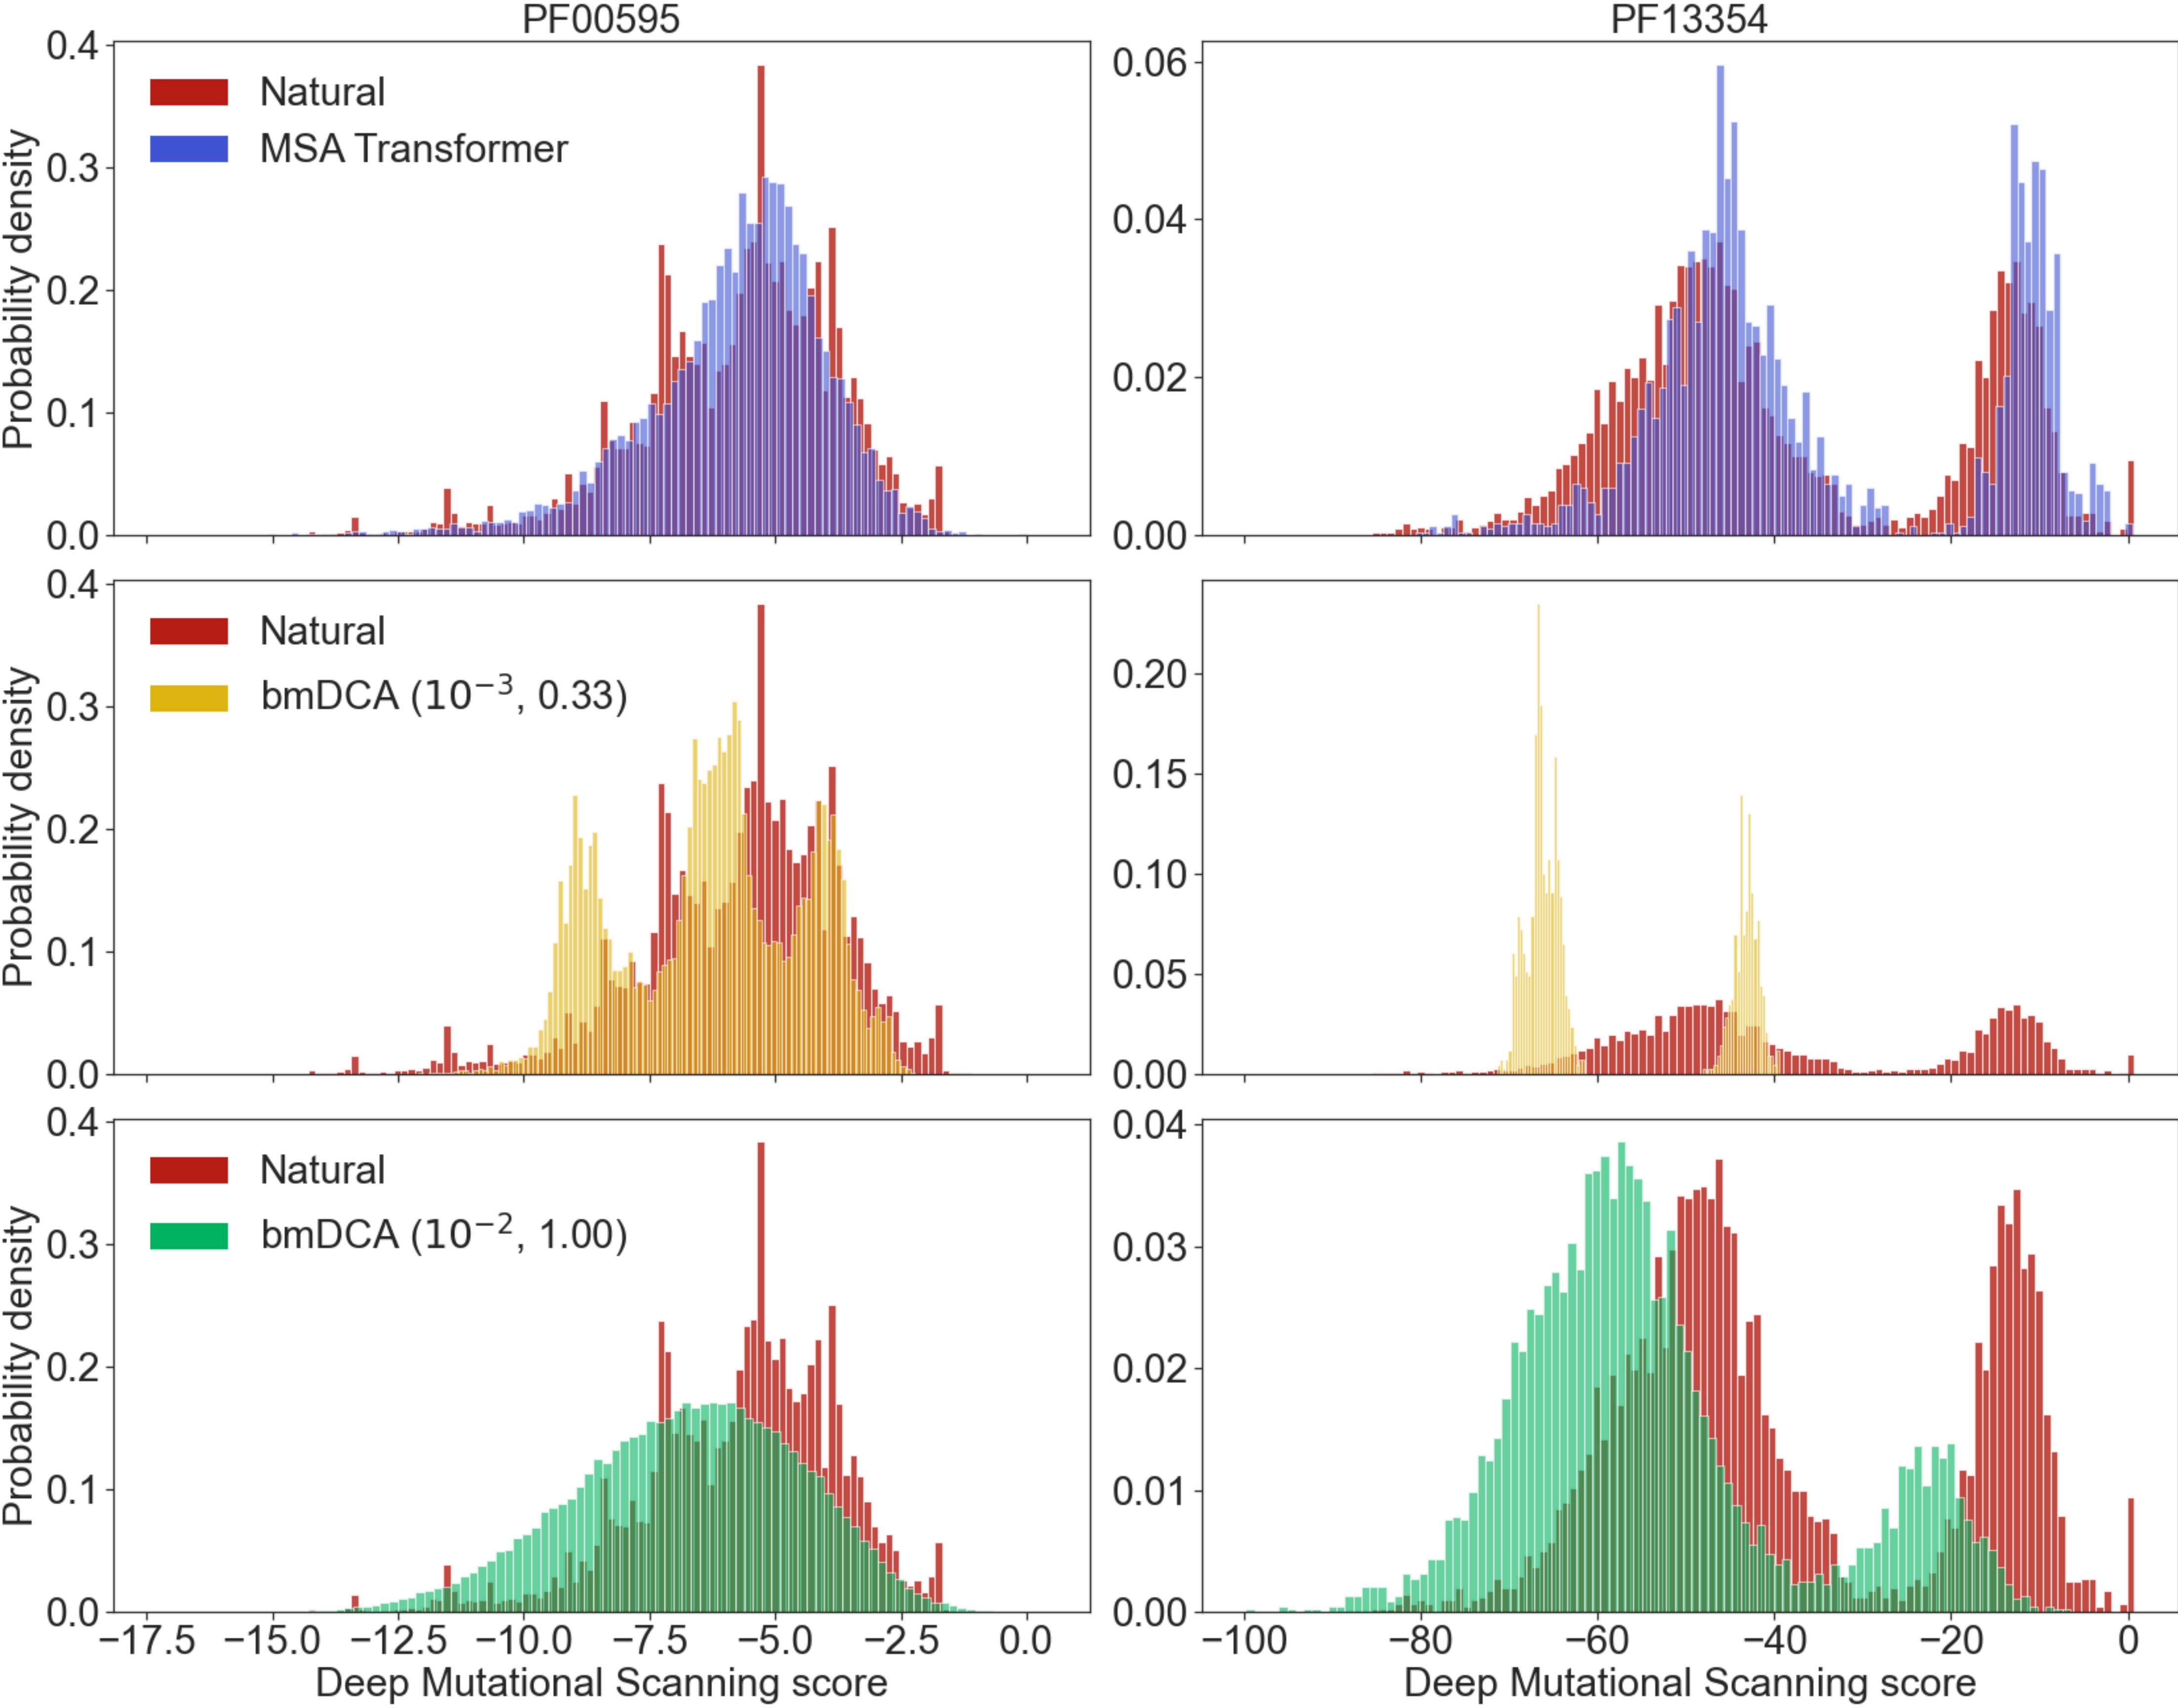

Supplement: supp [file elife-79854-supp-v1.zip]

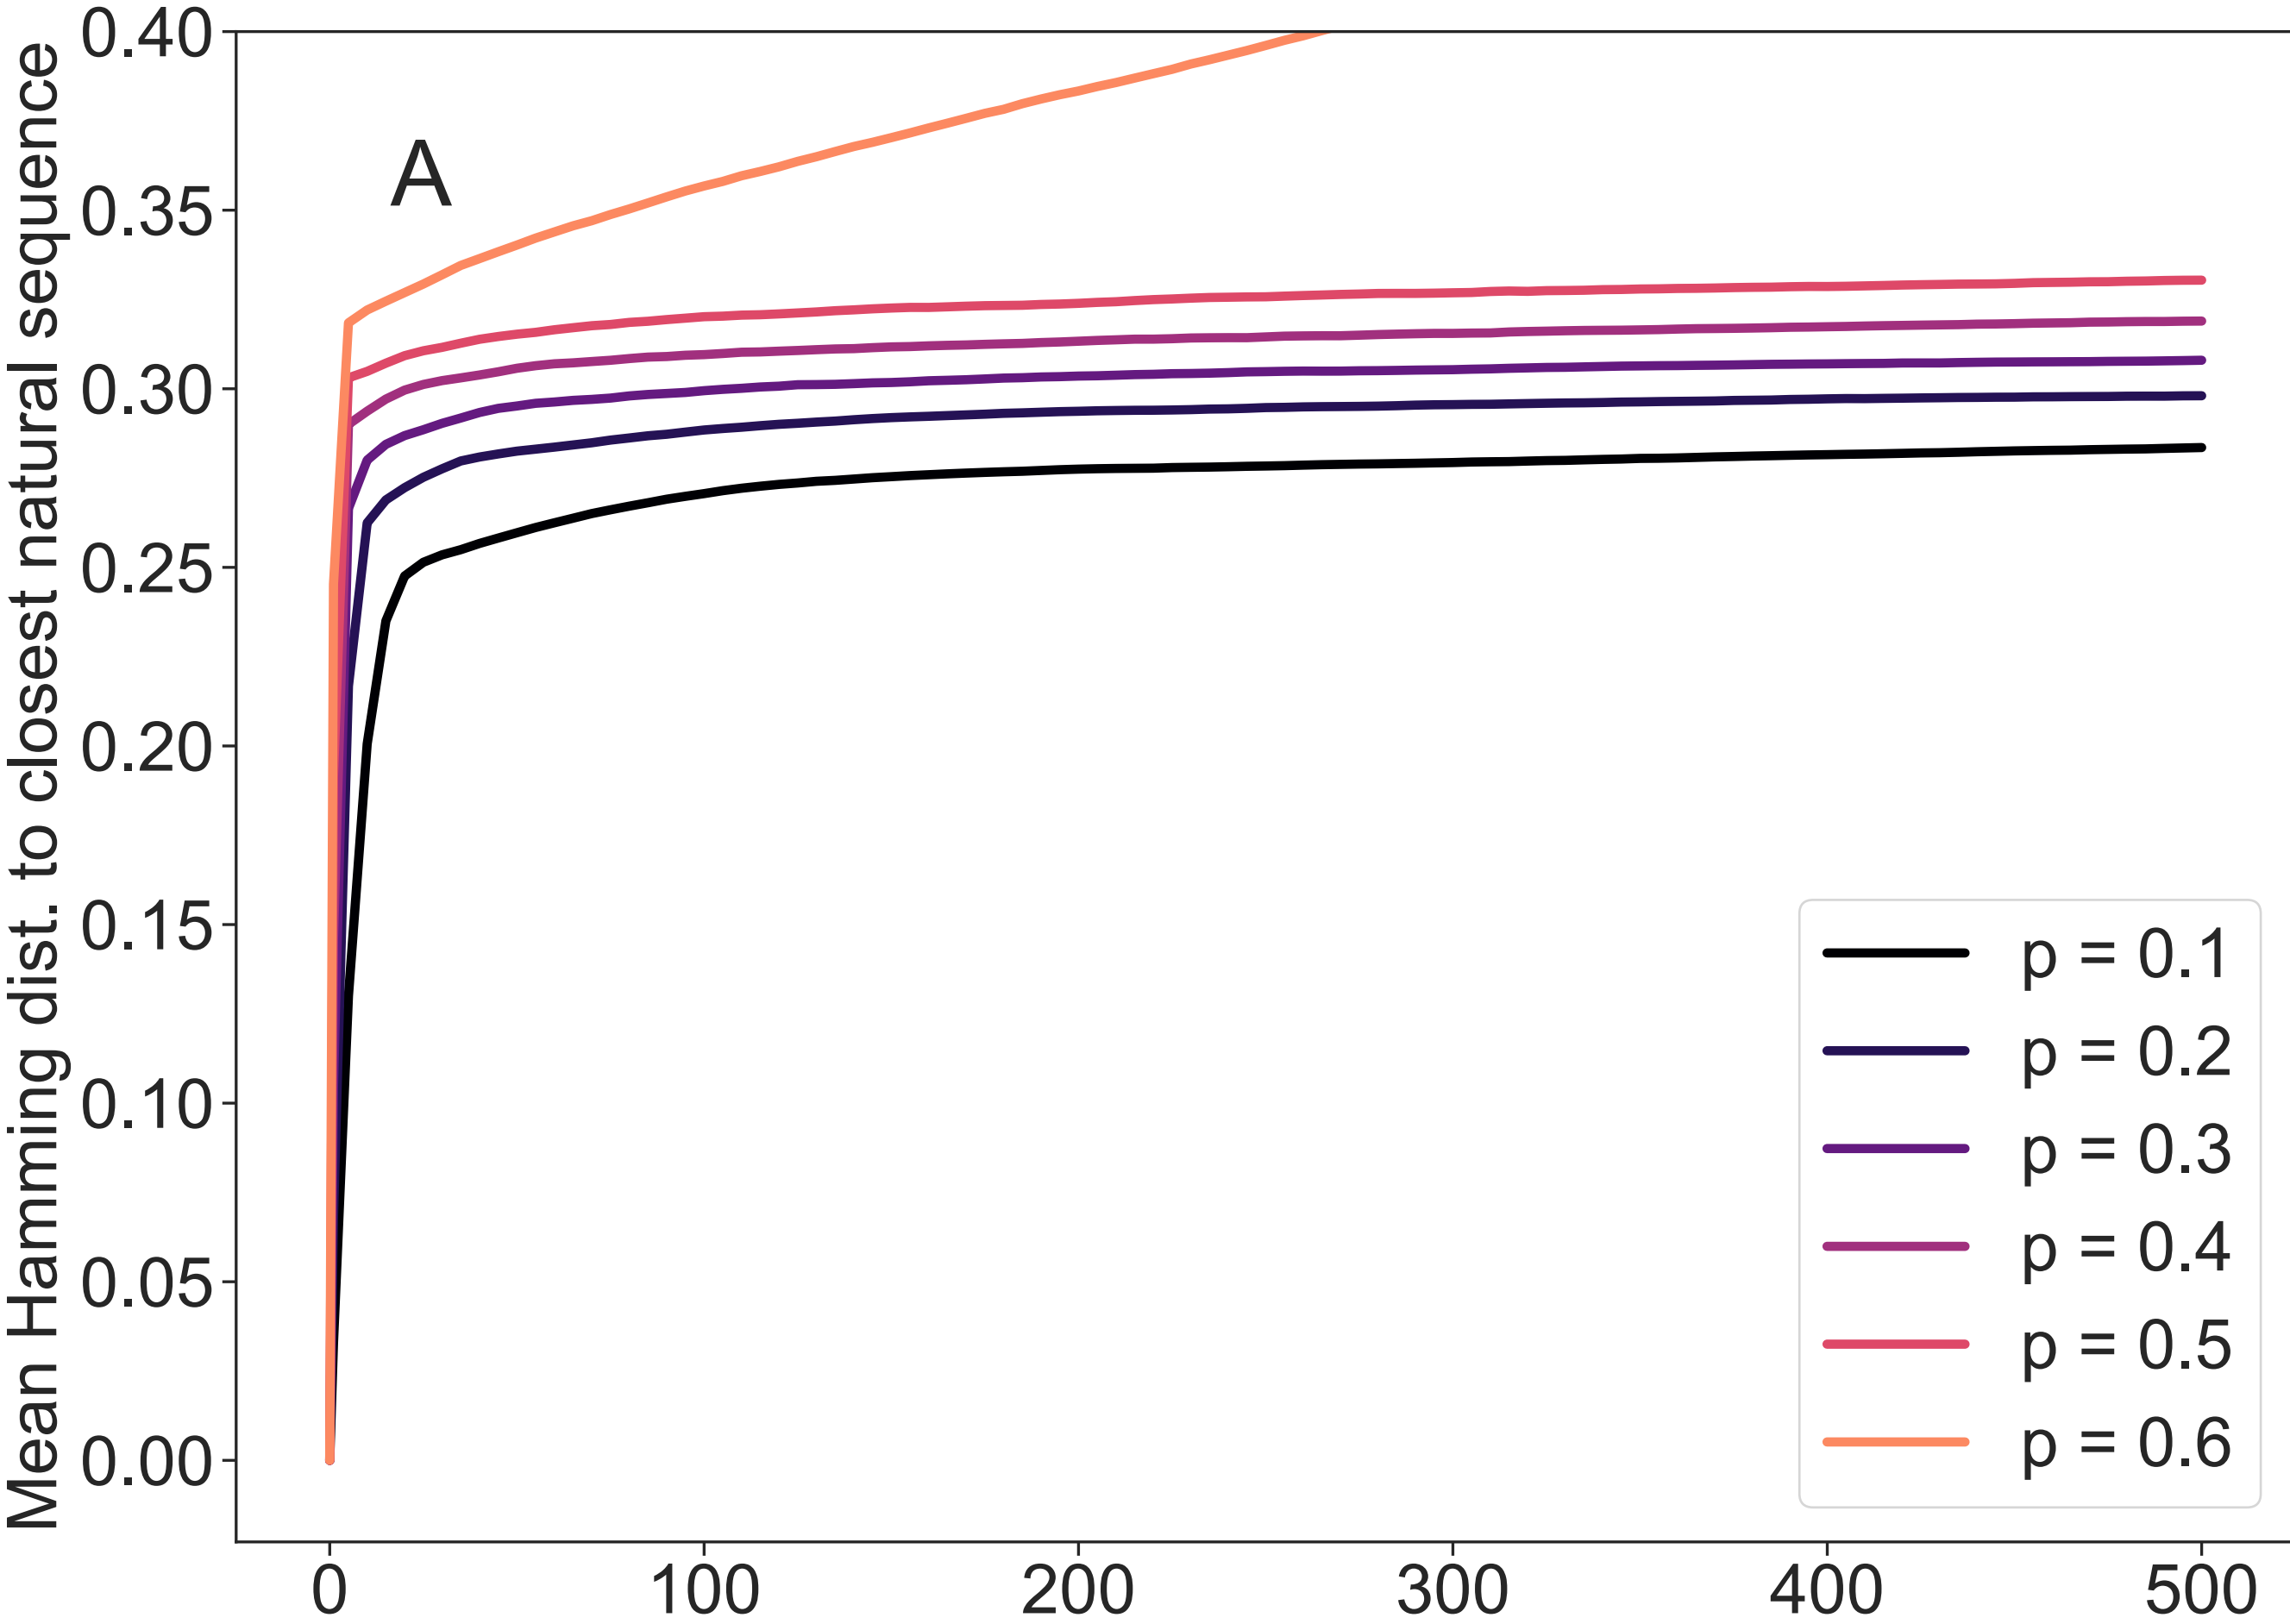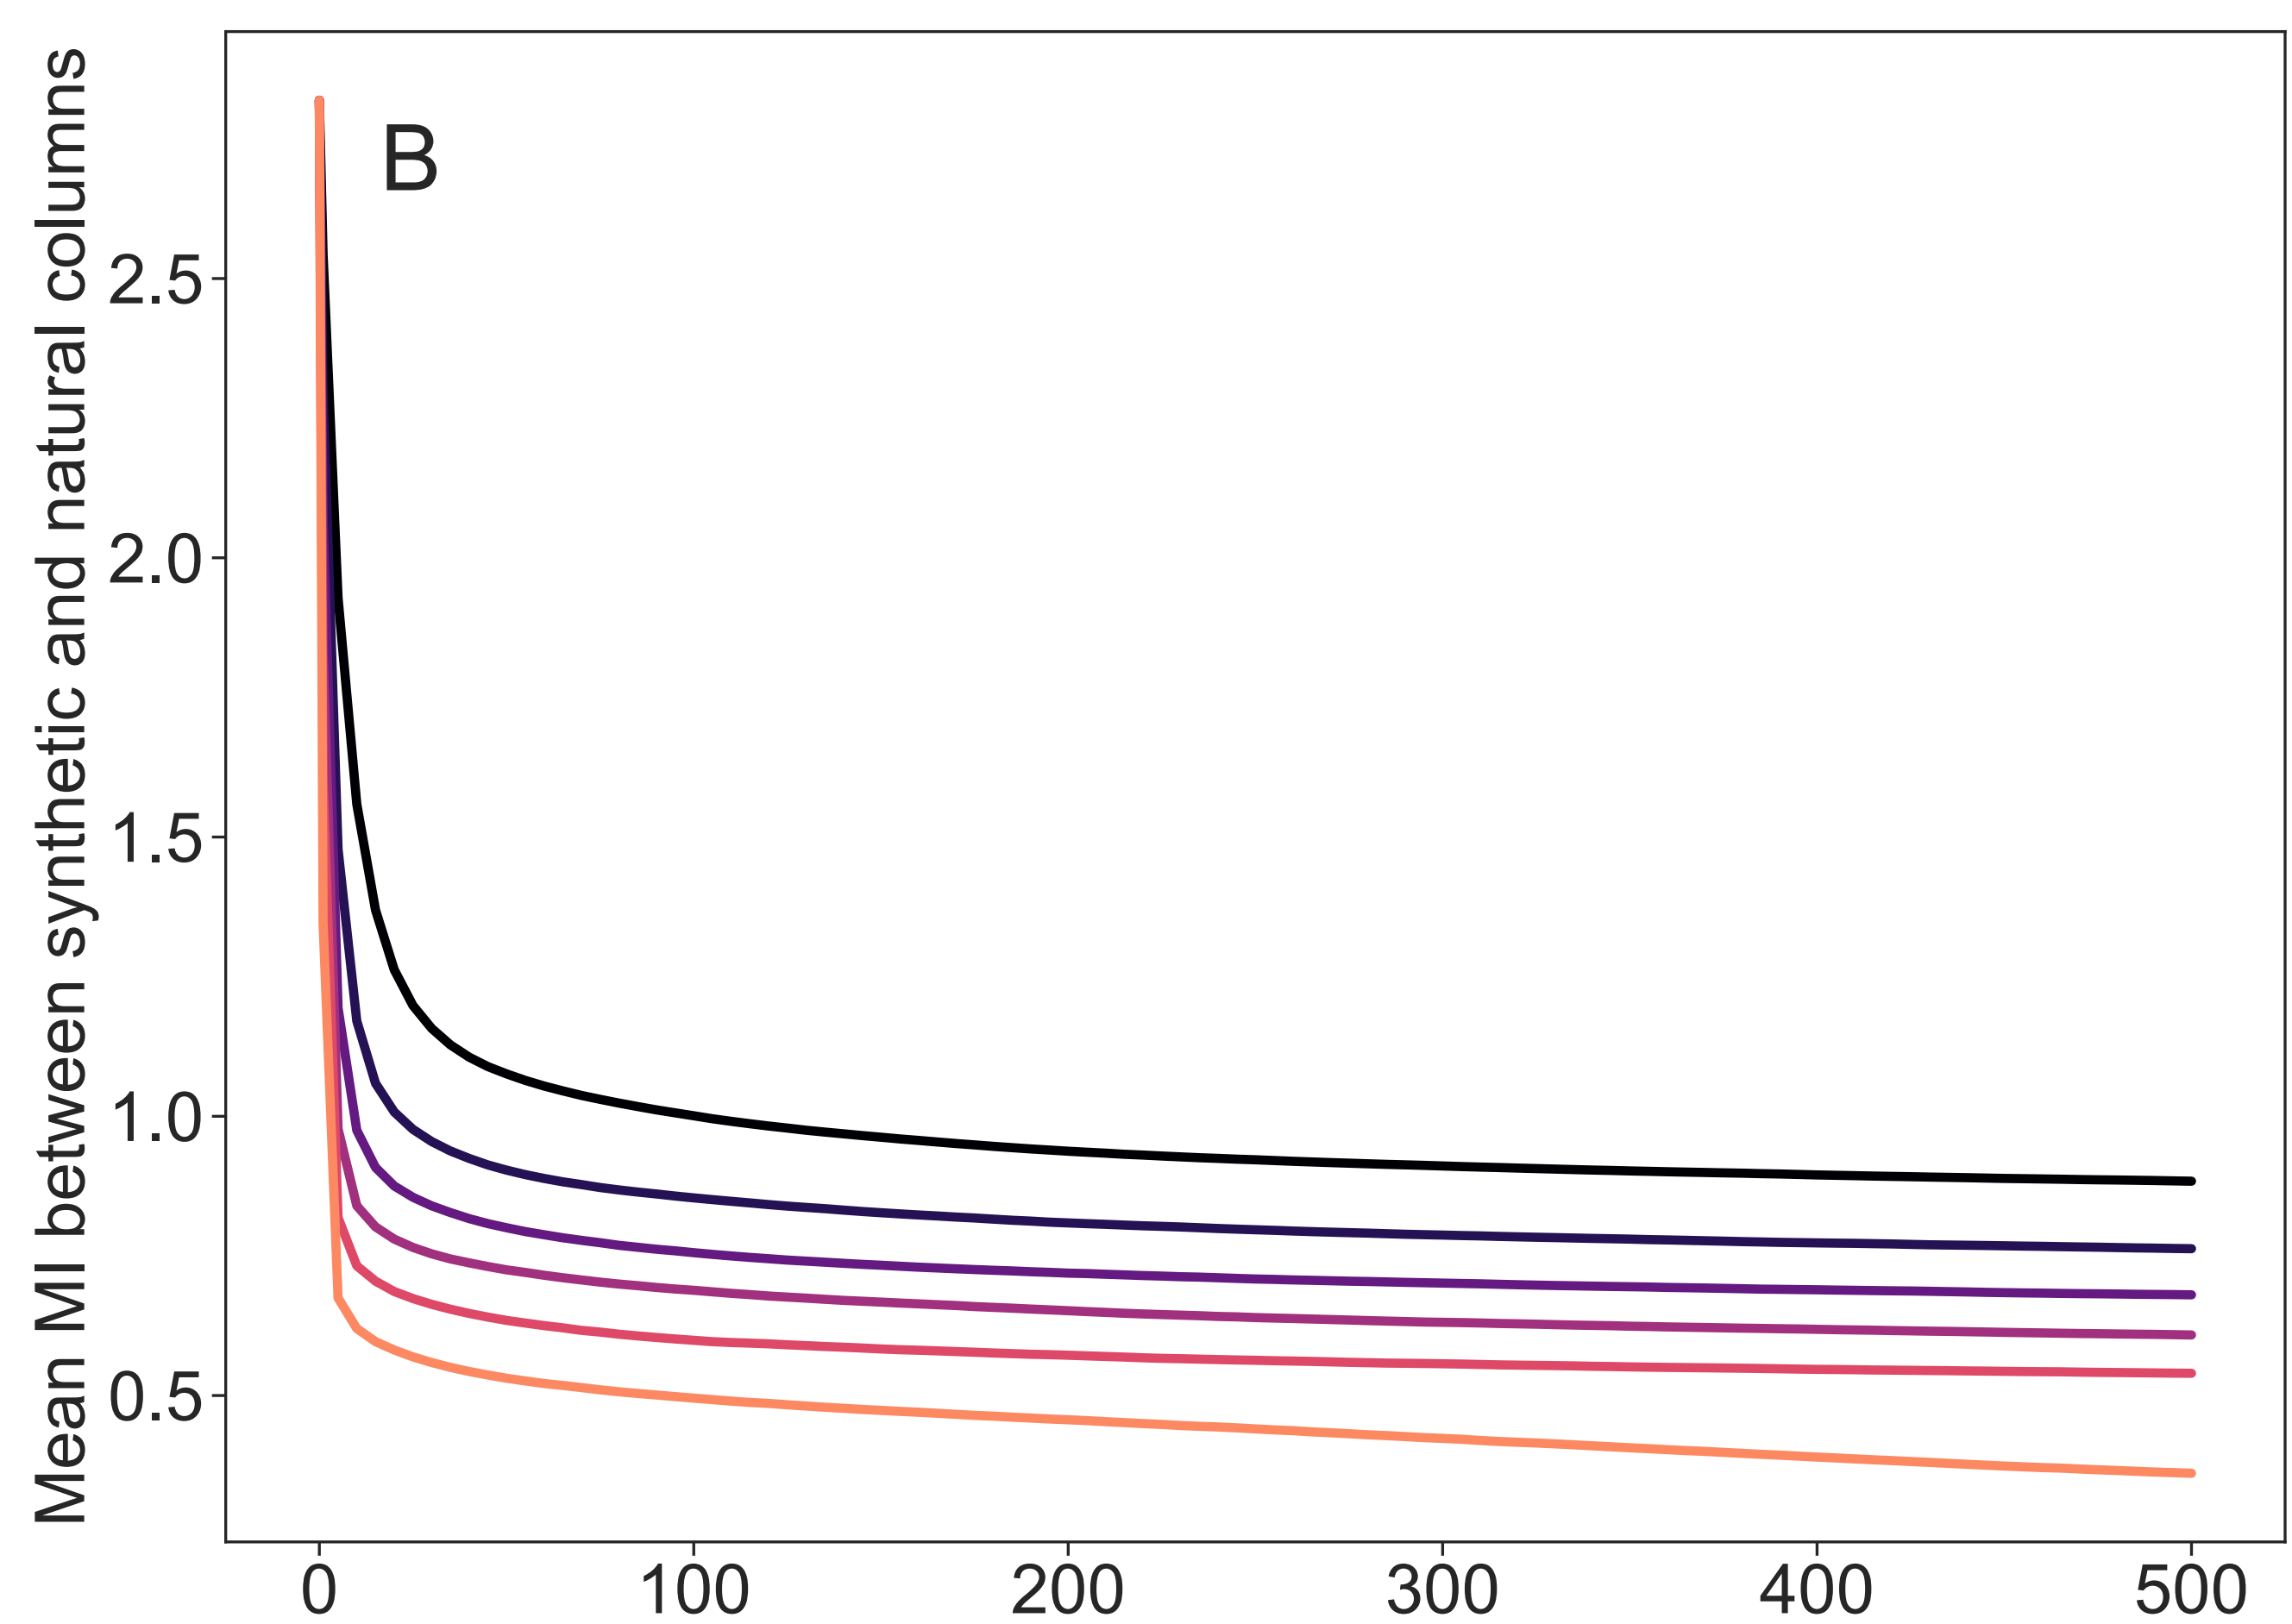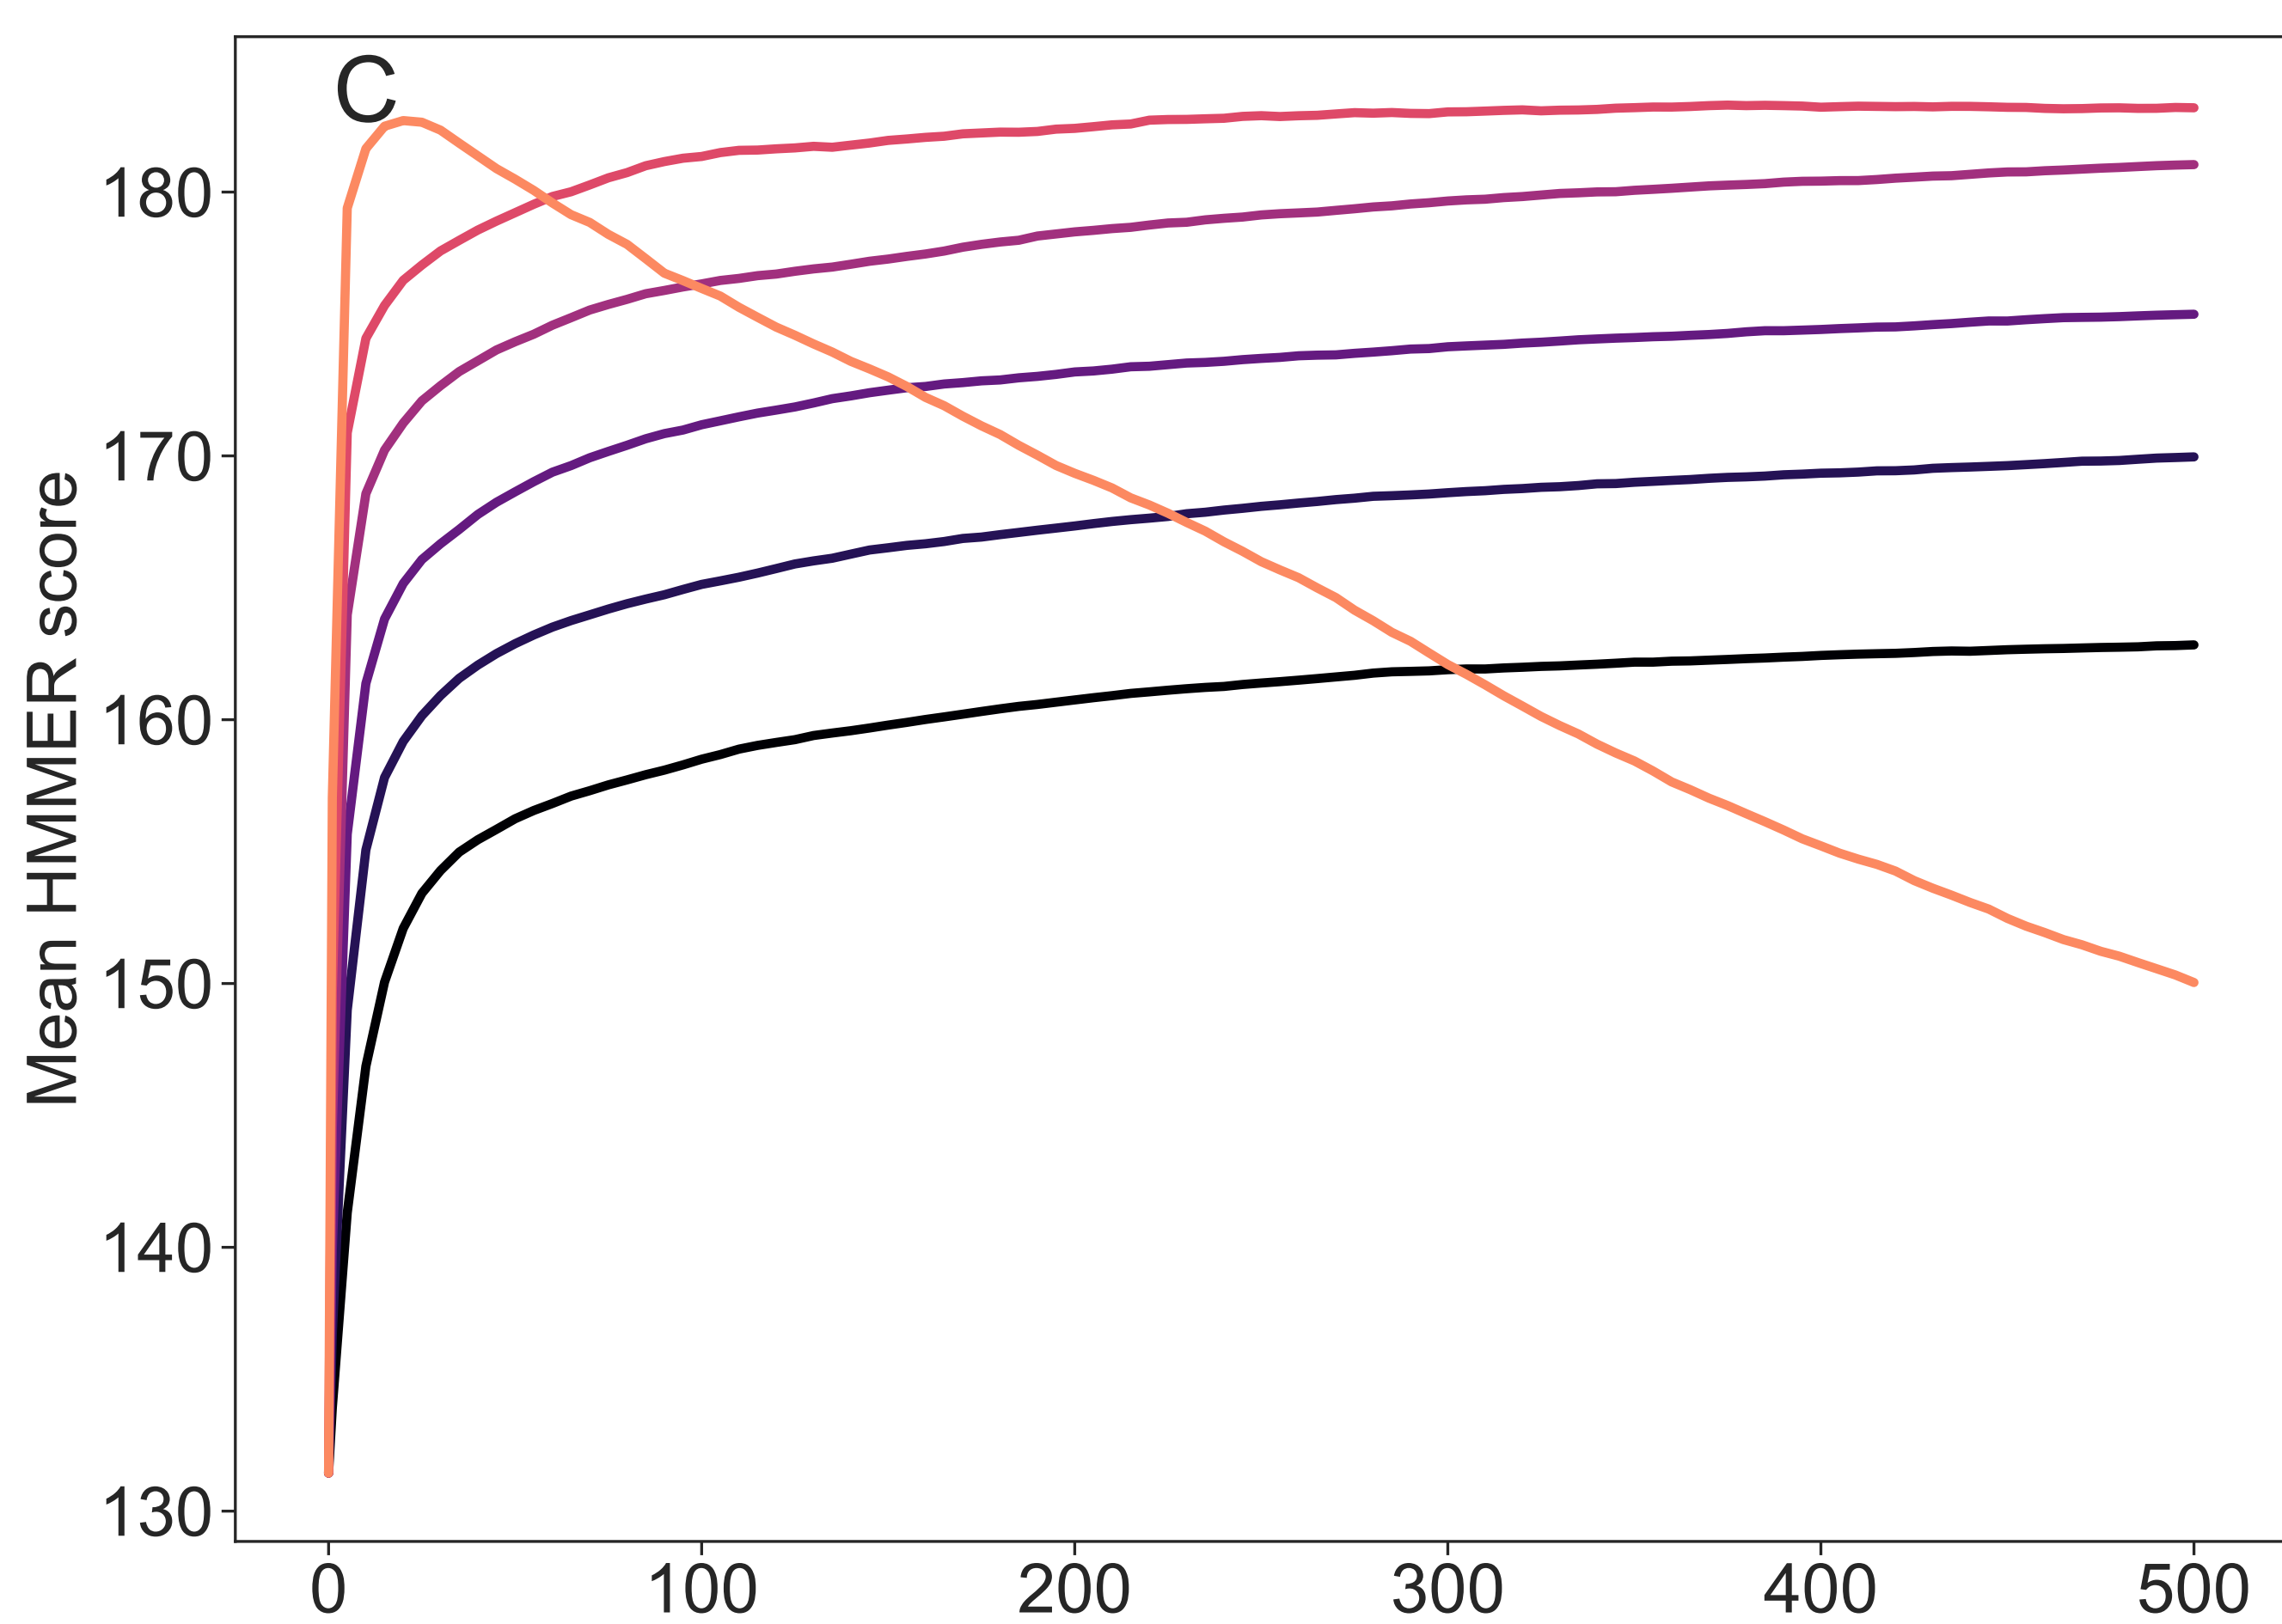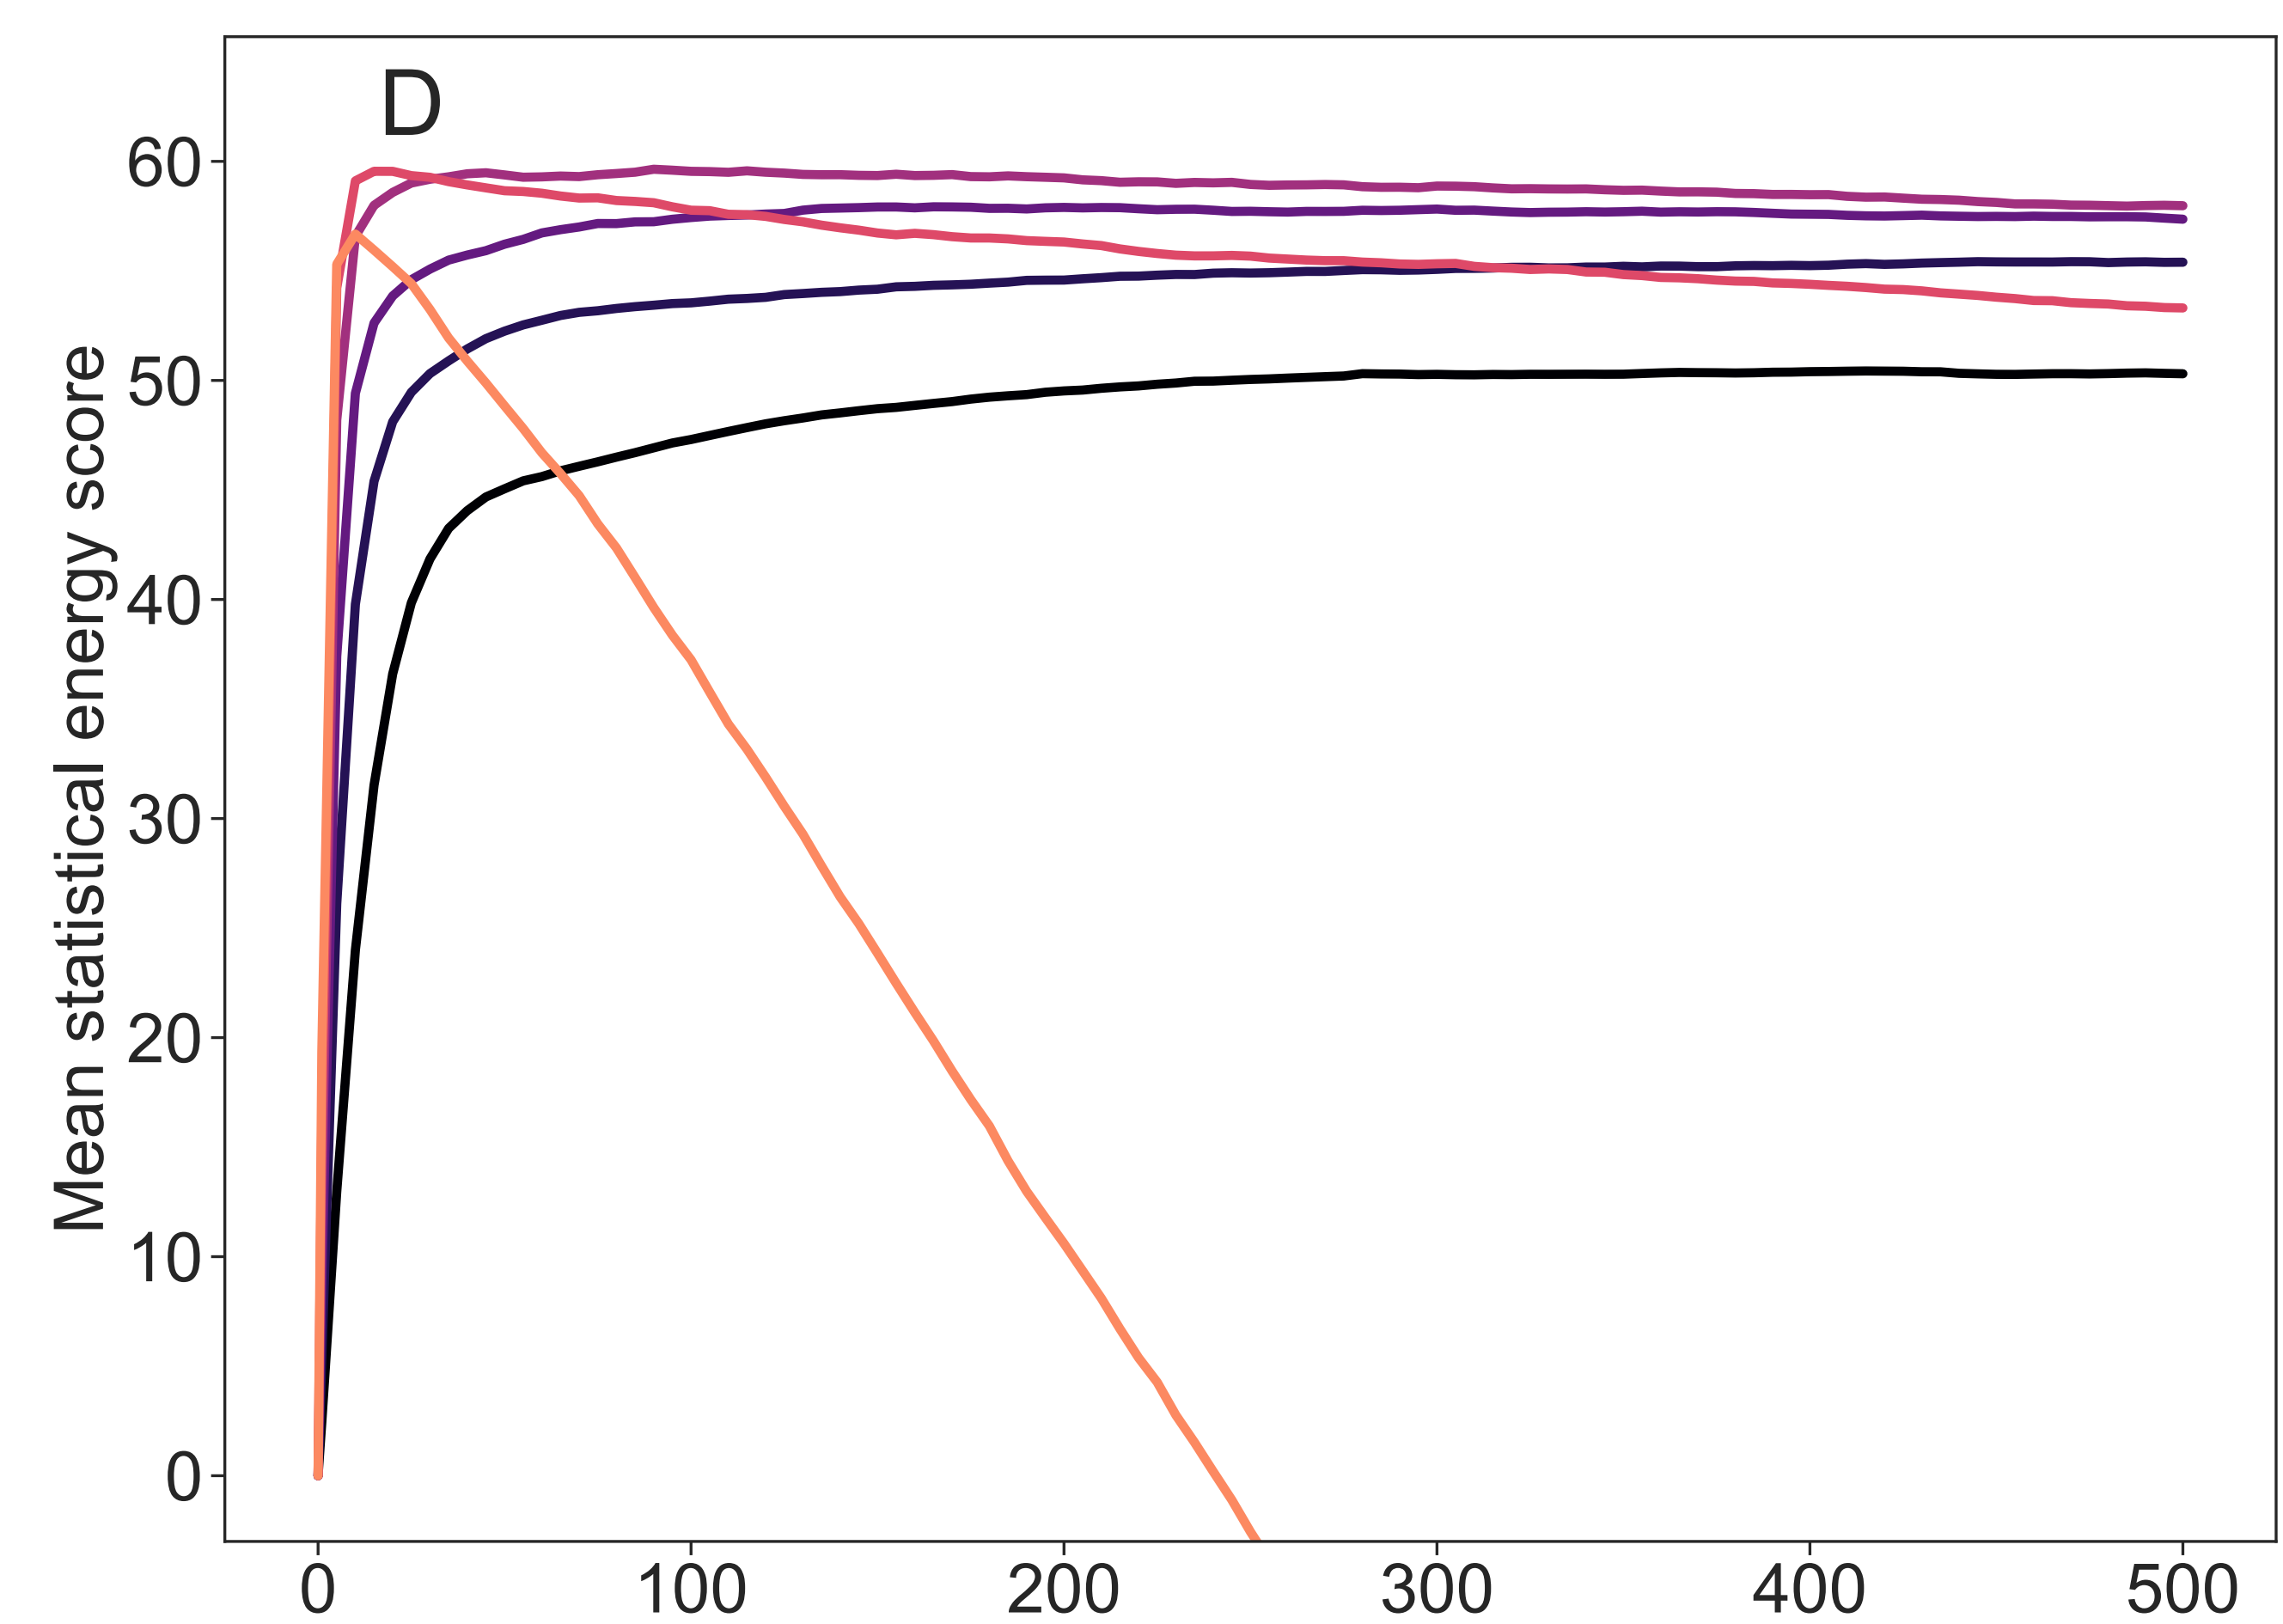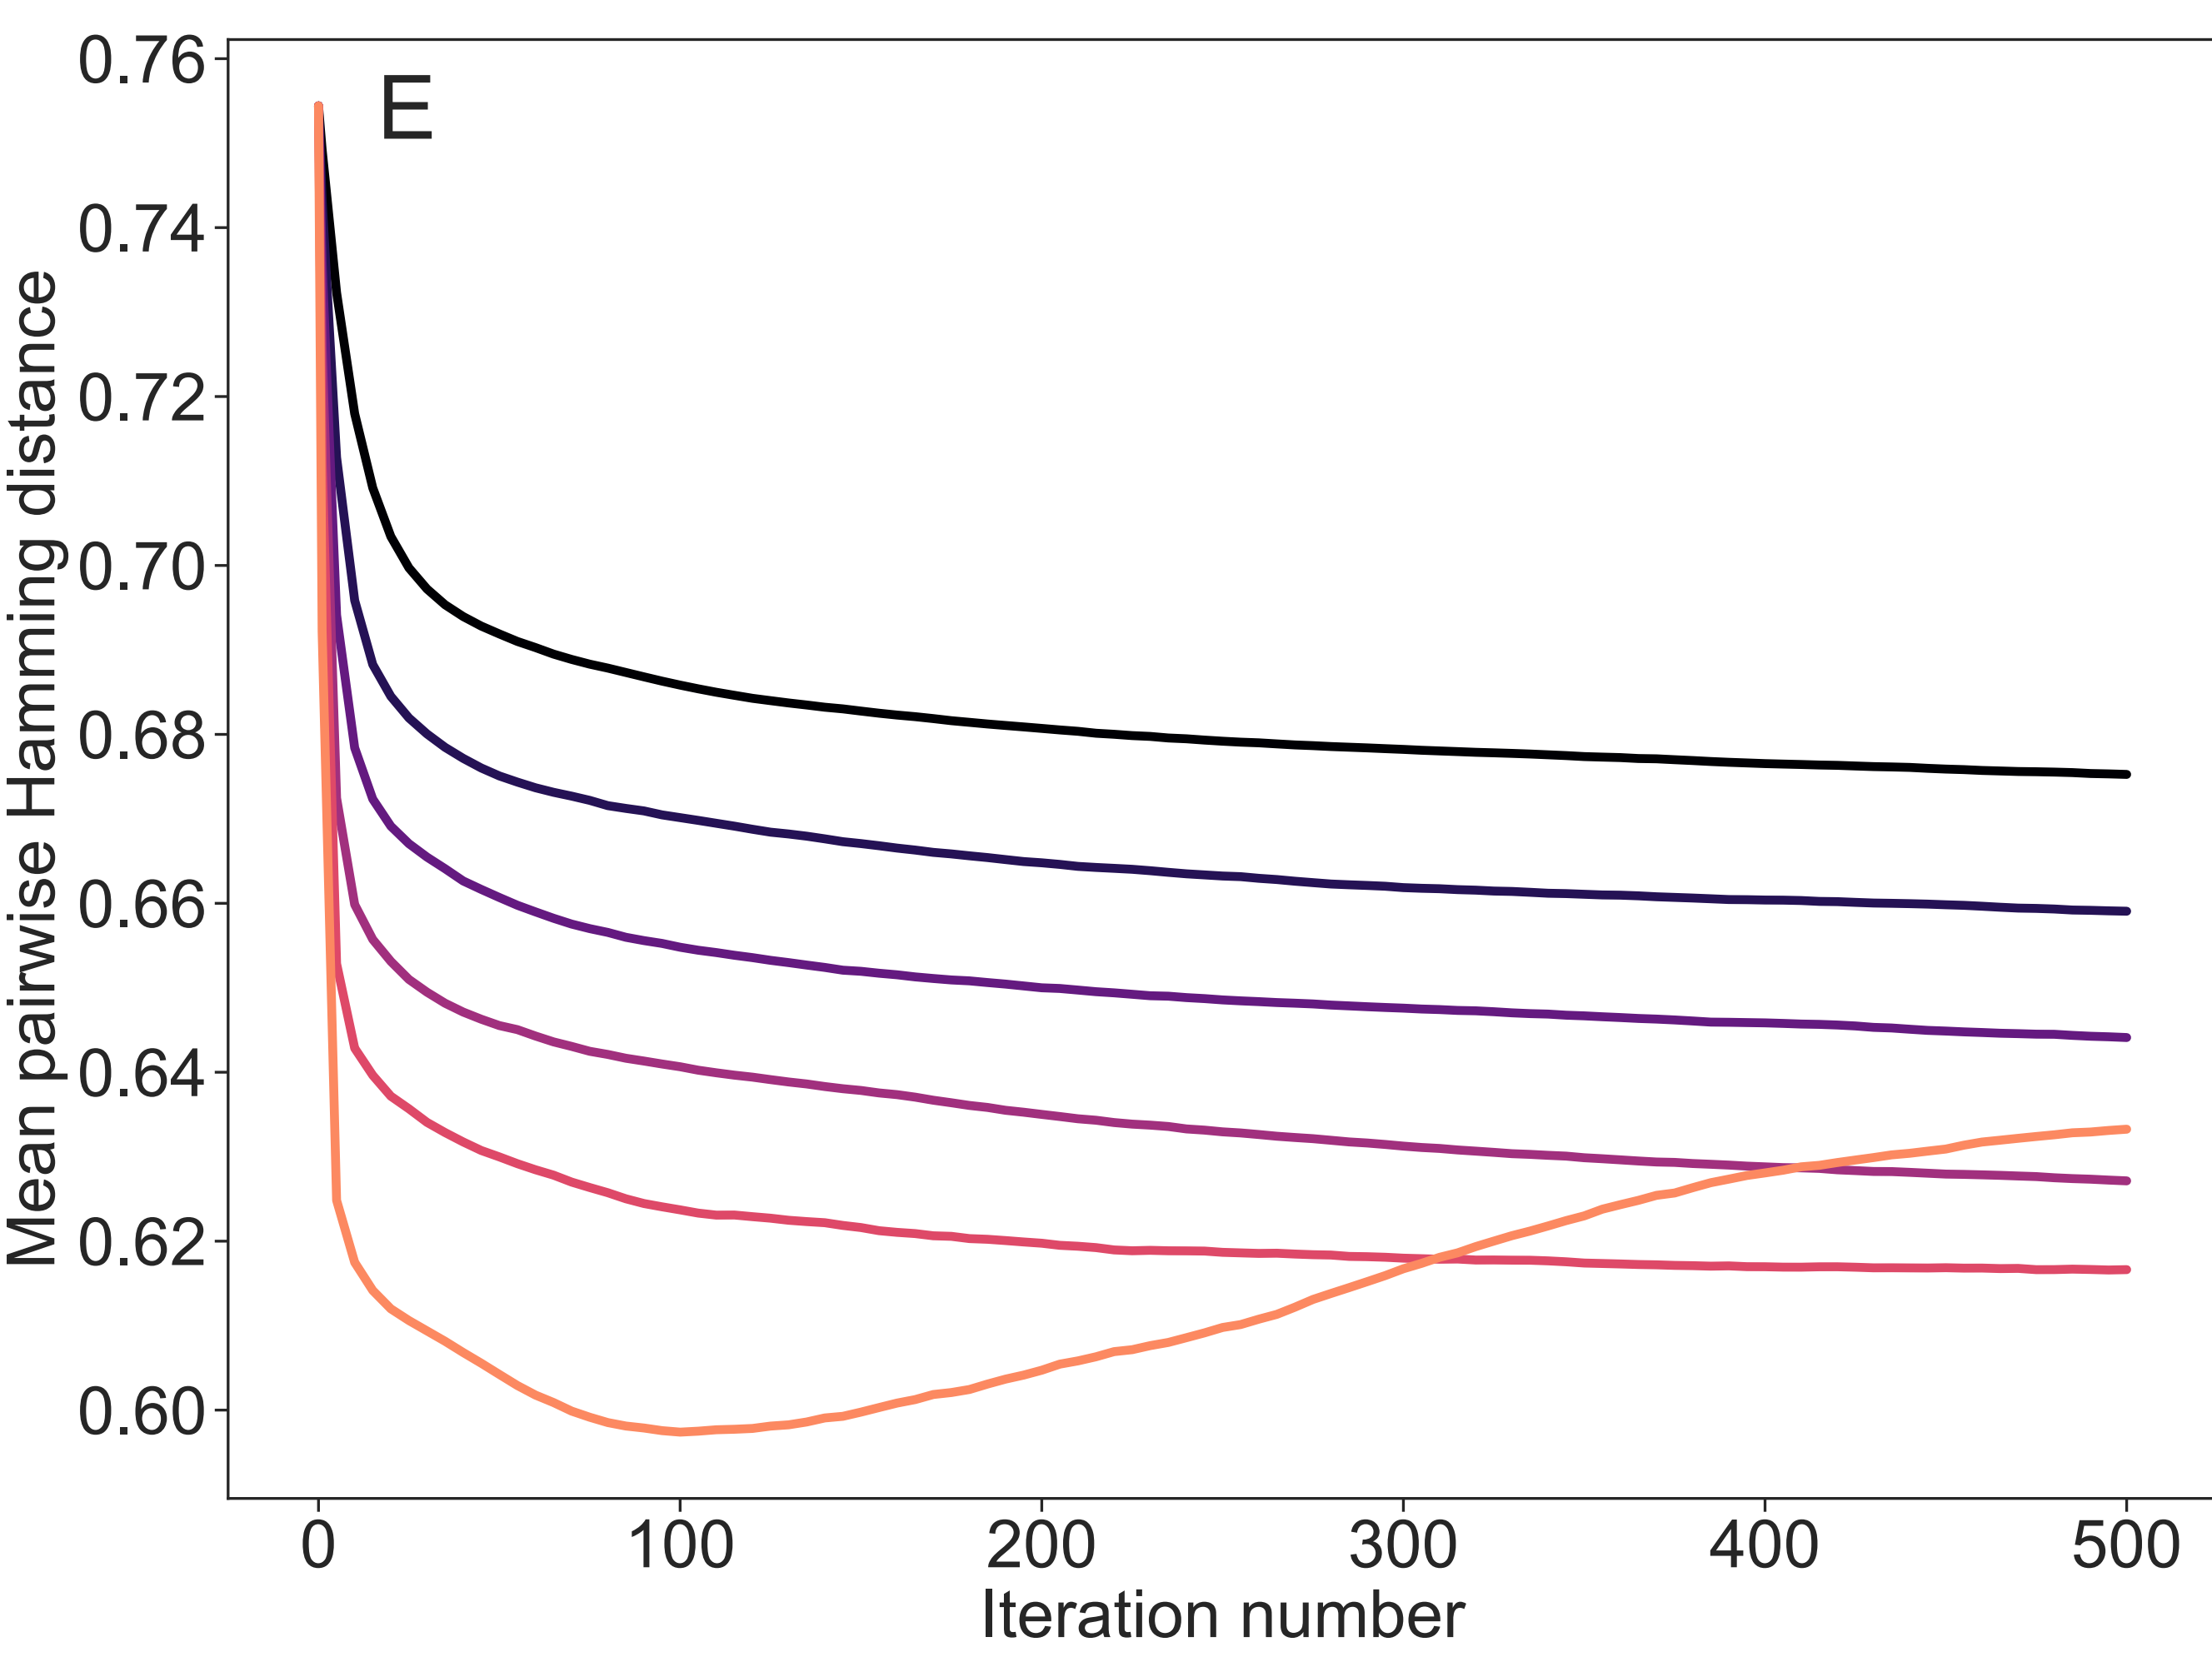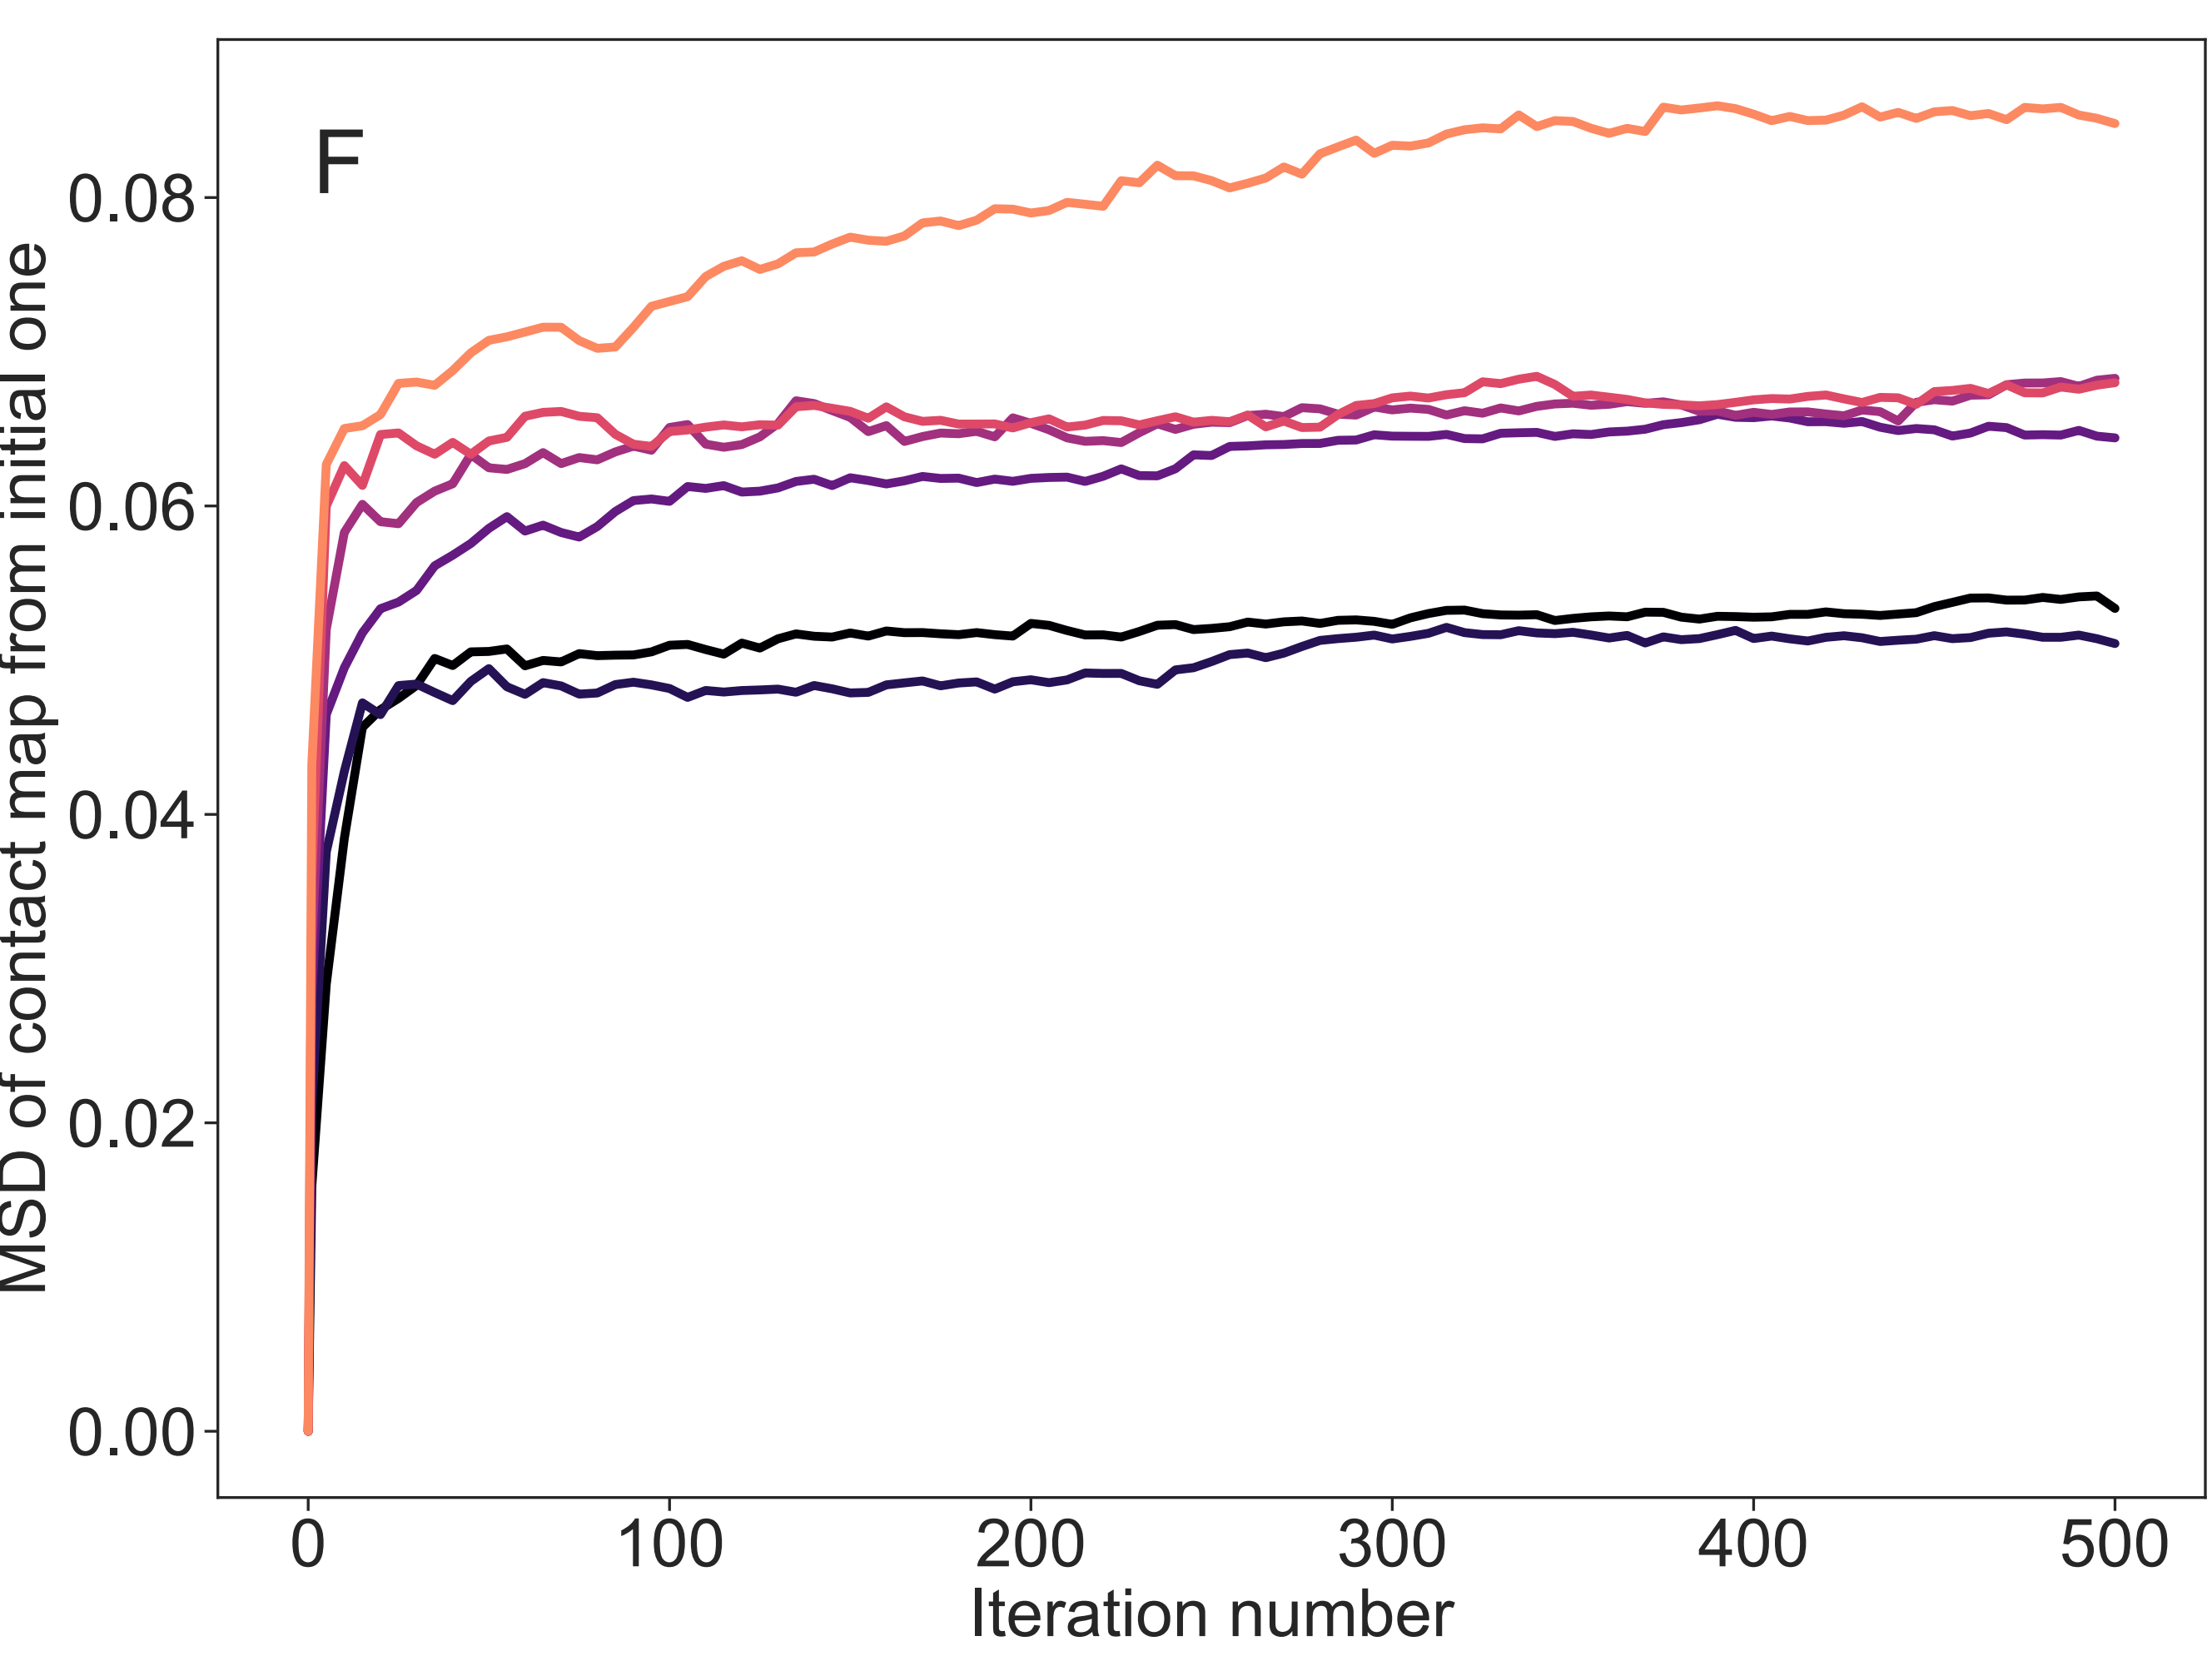

Supplement: supp [file elife-79854-supp-v1.zip]

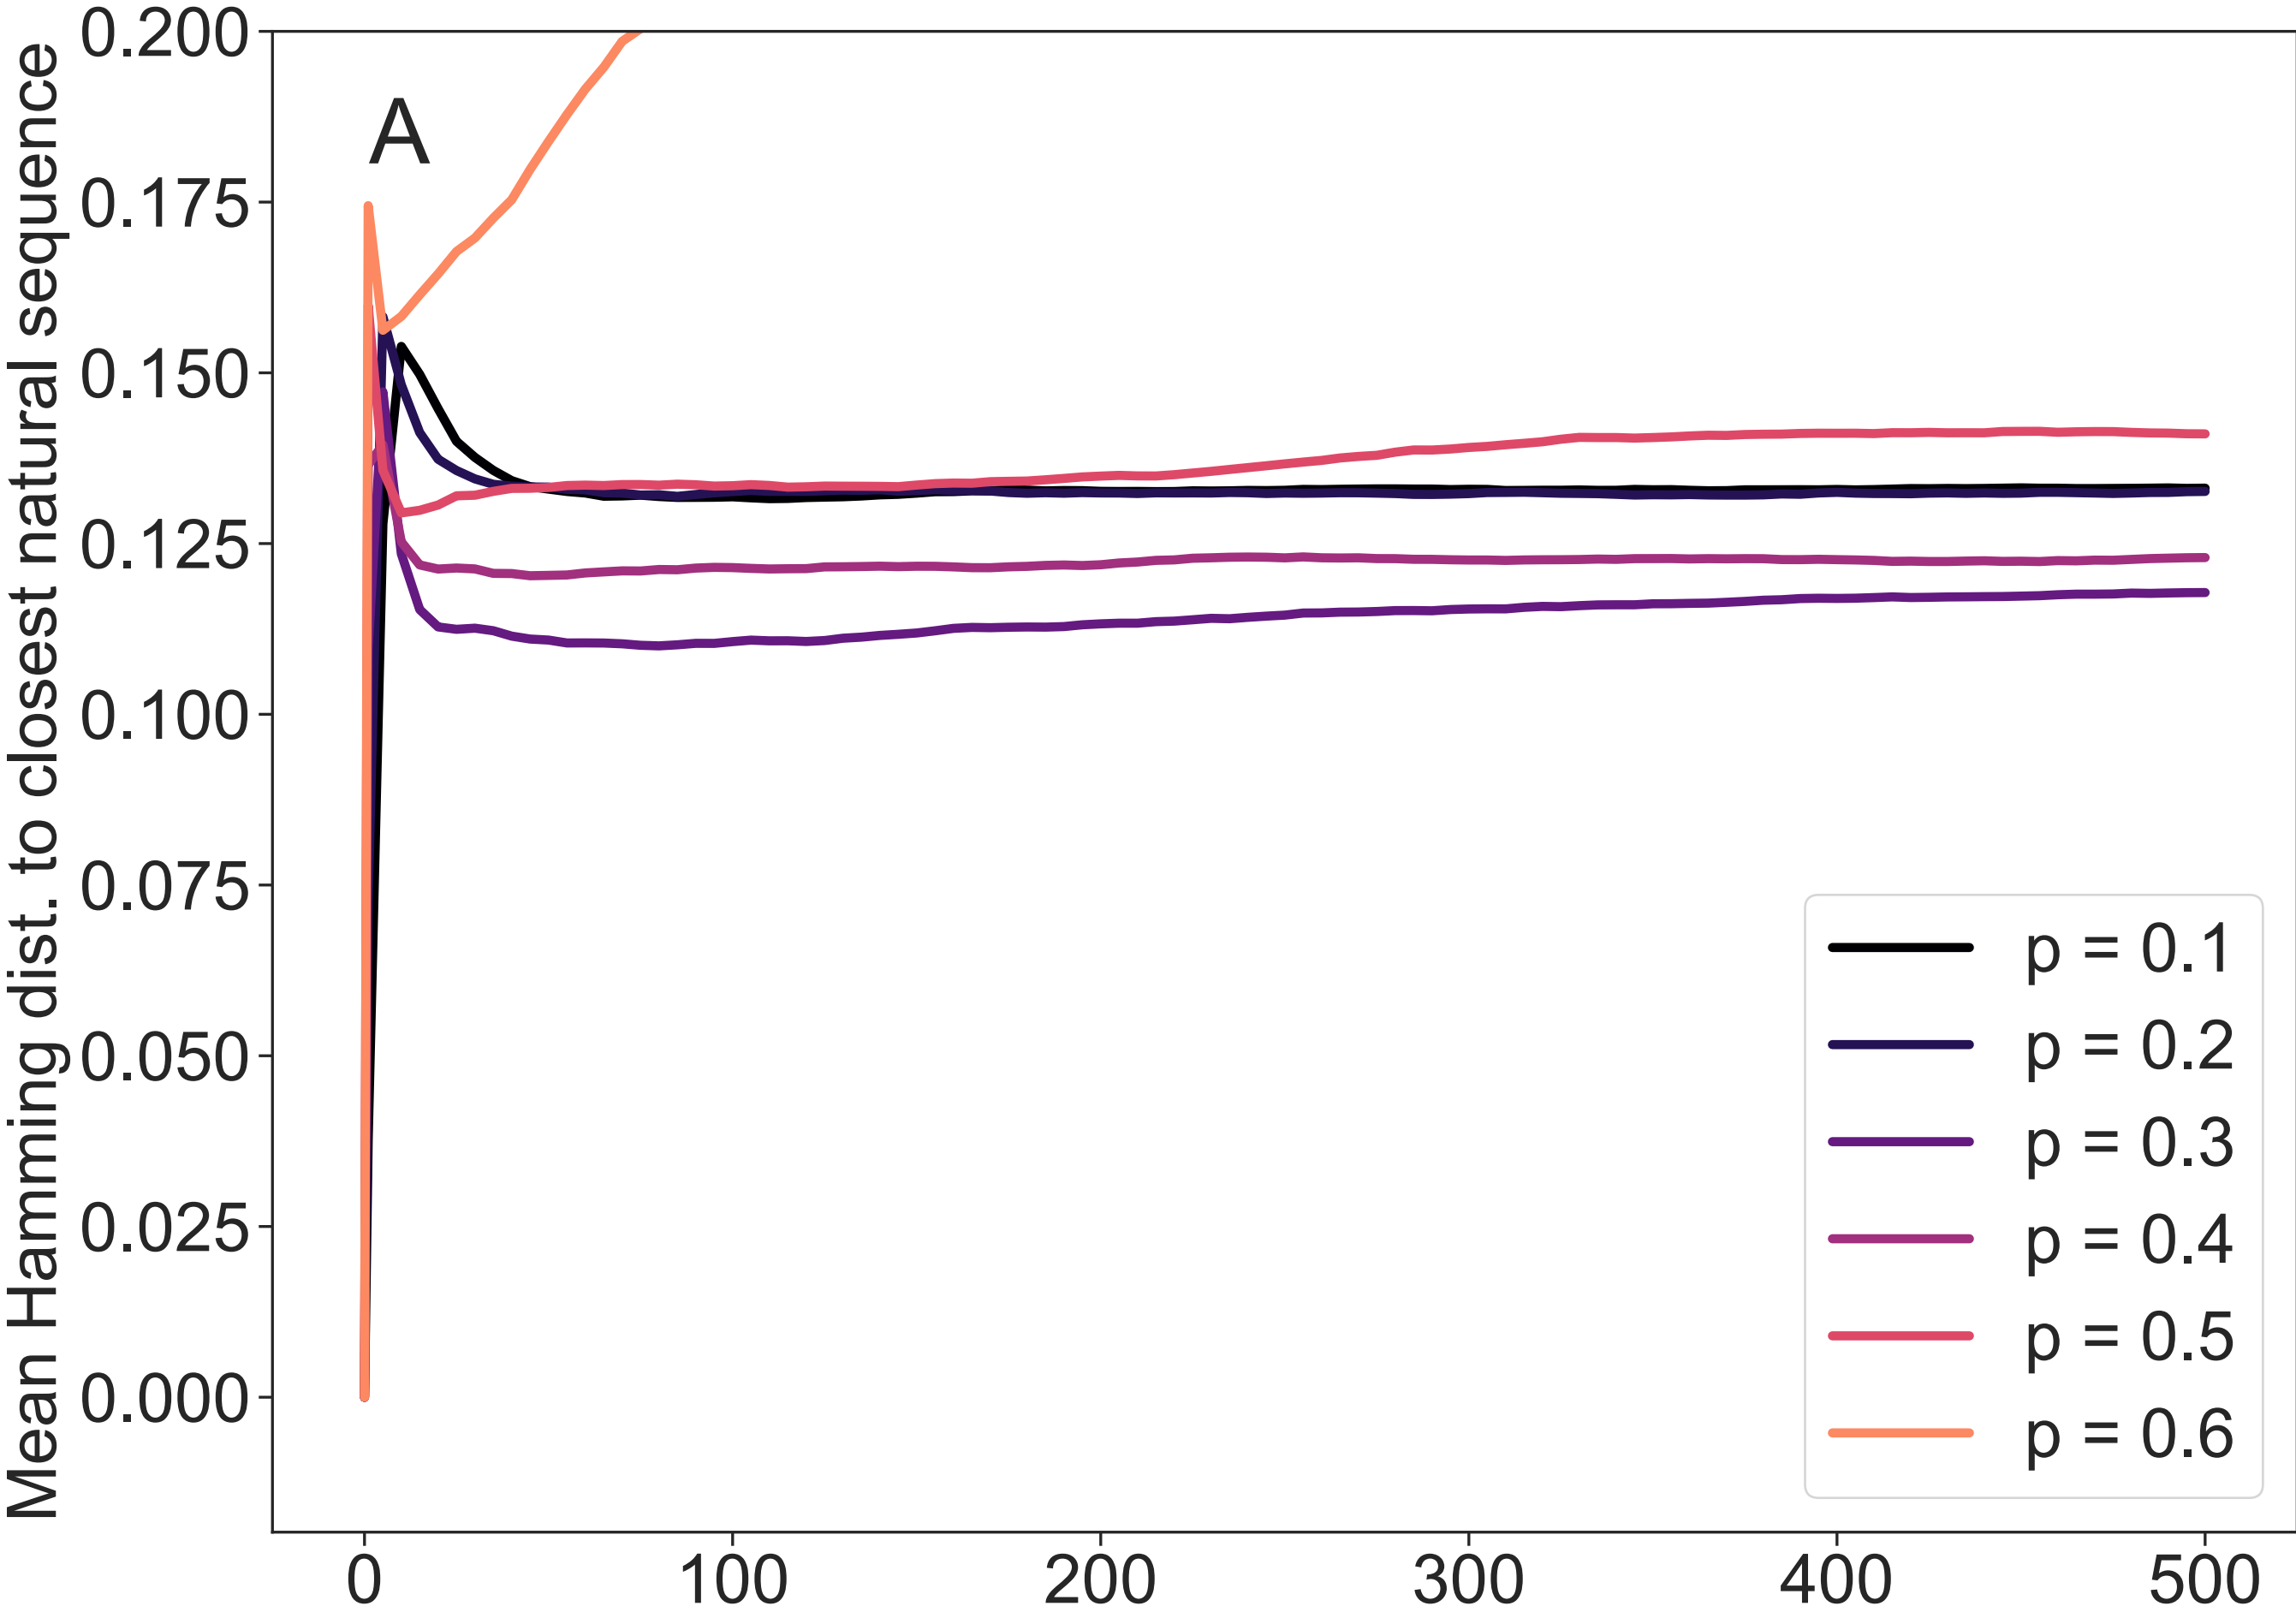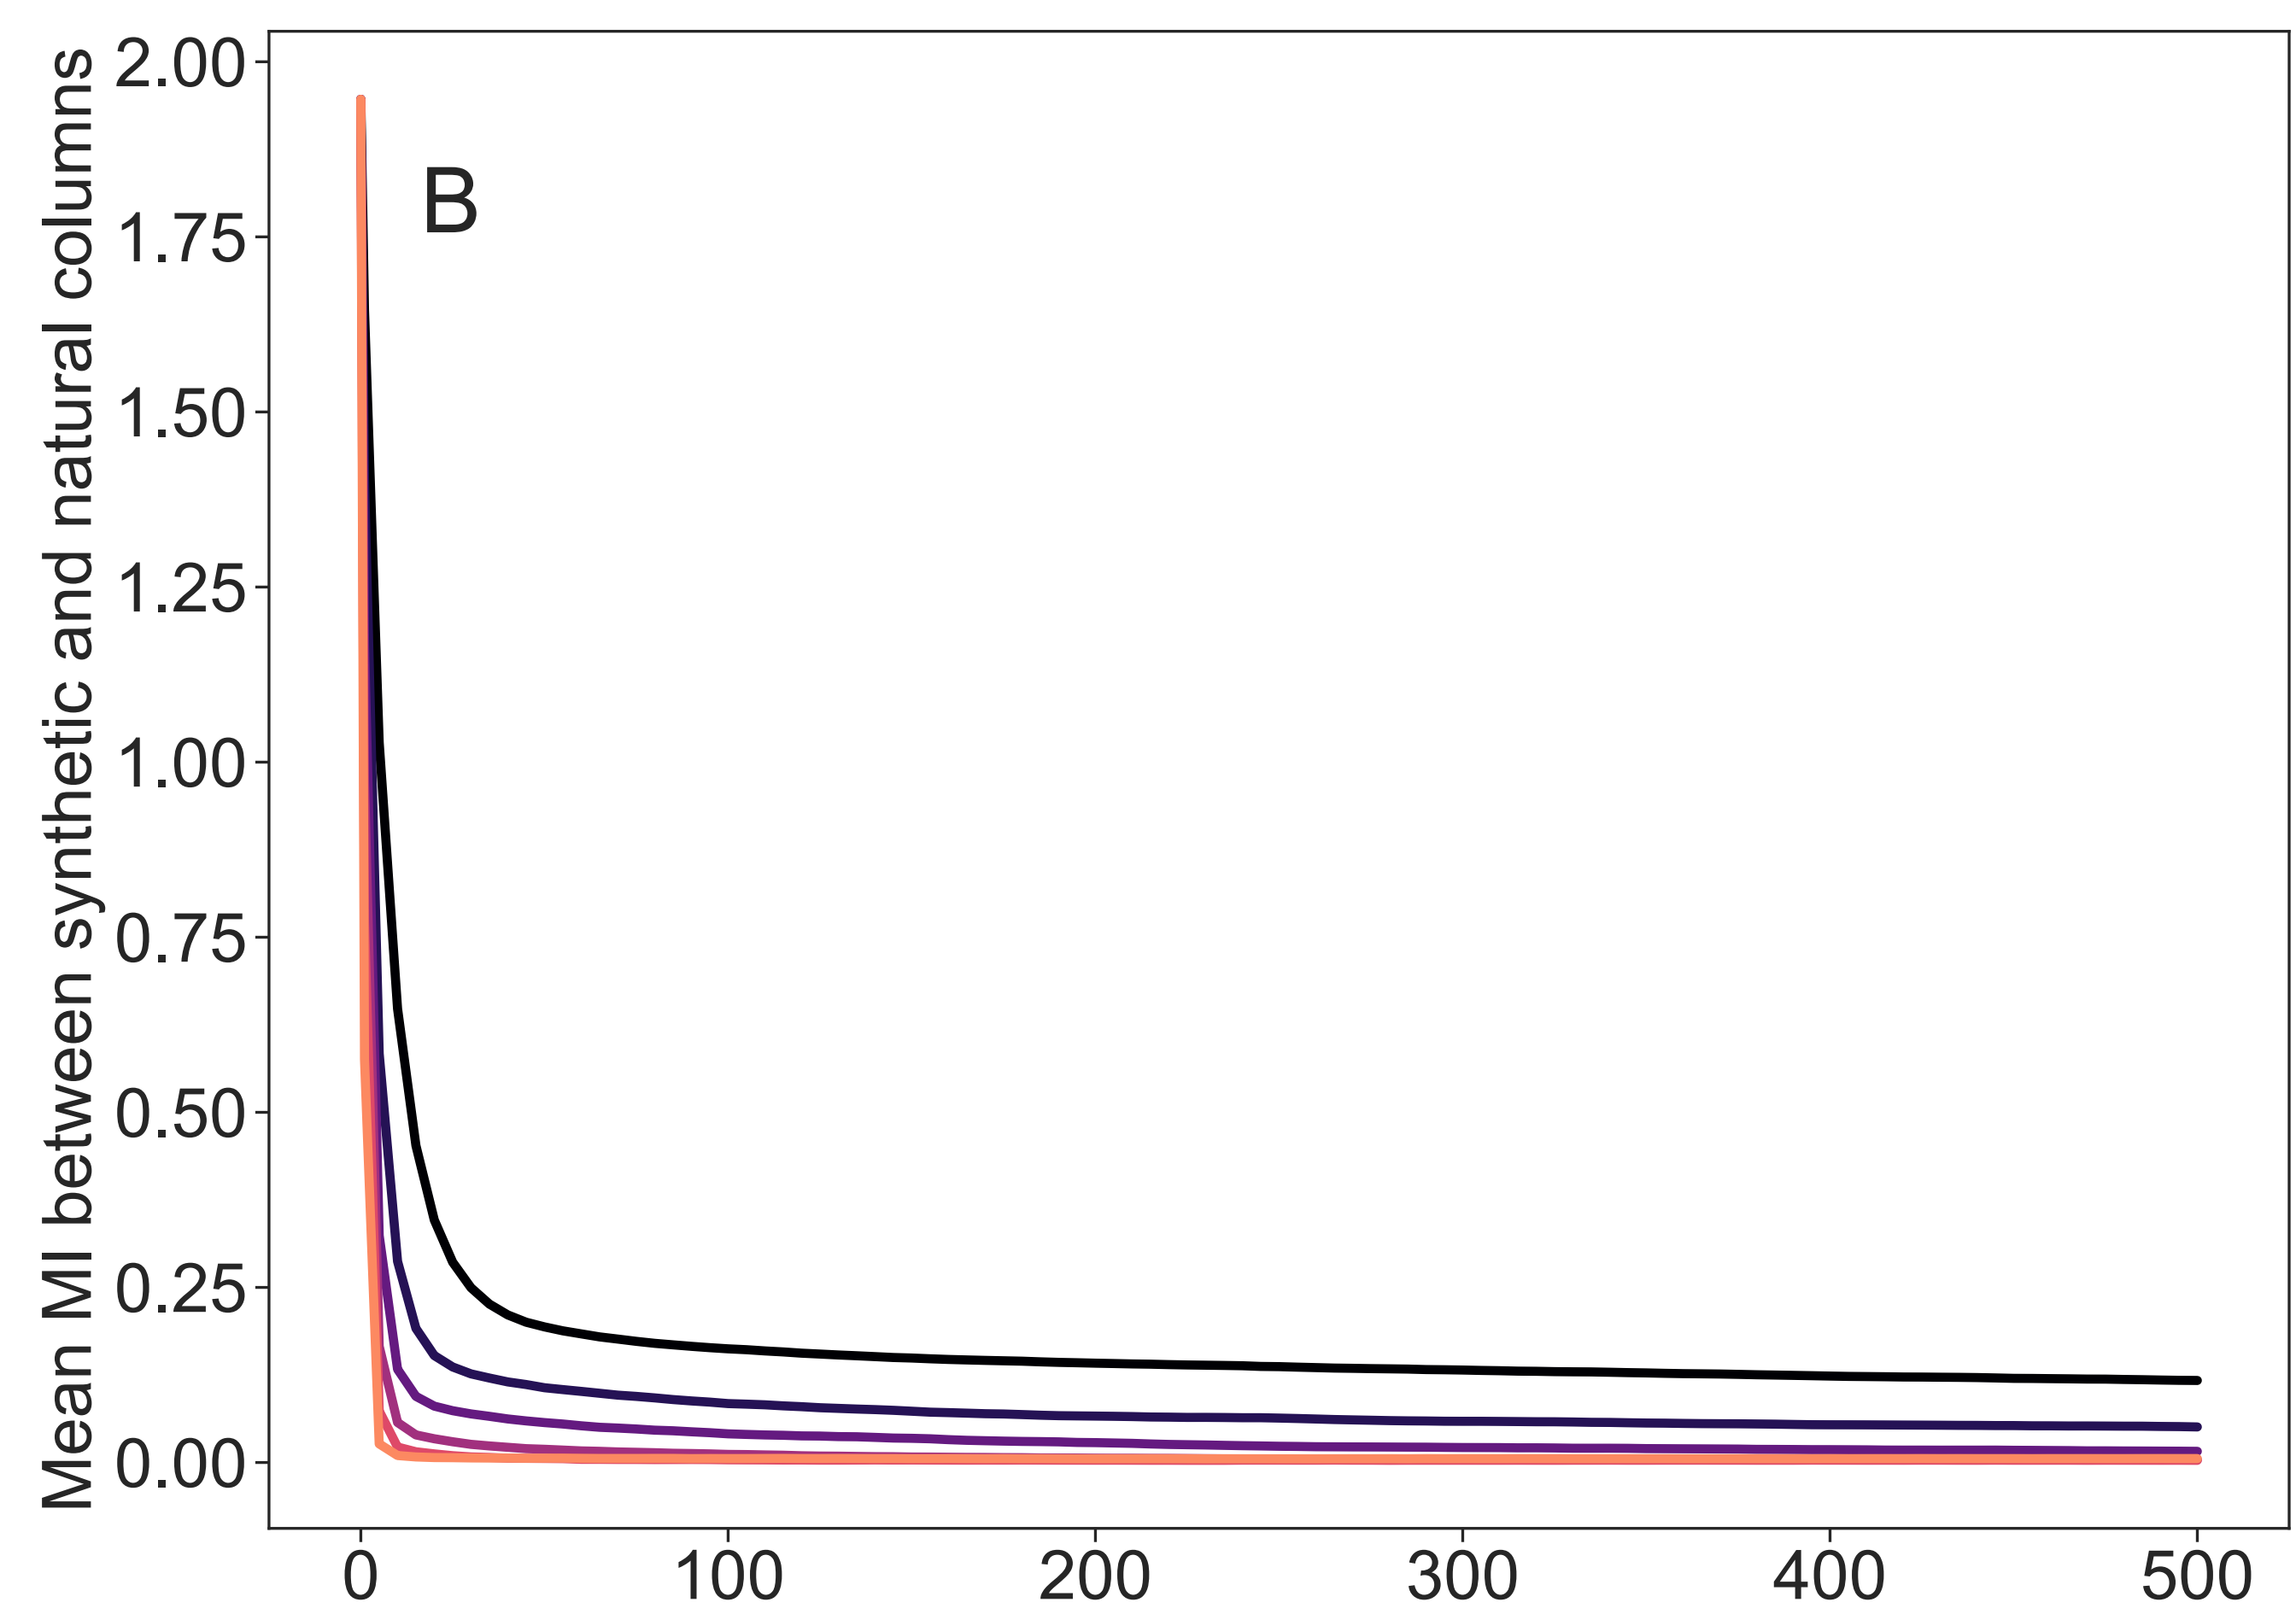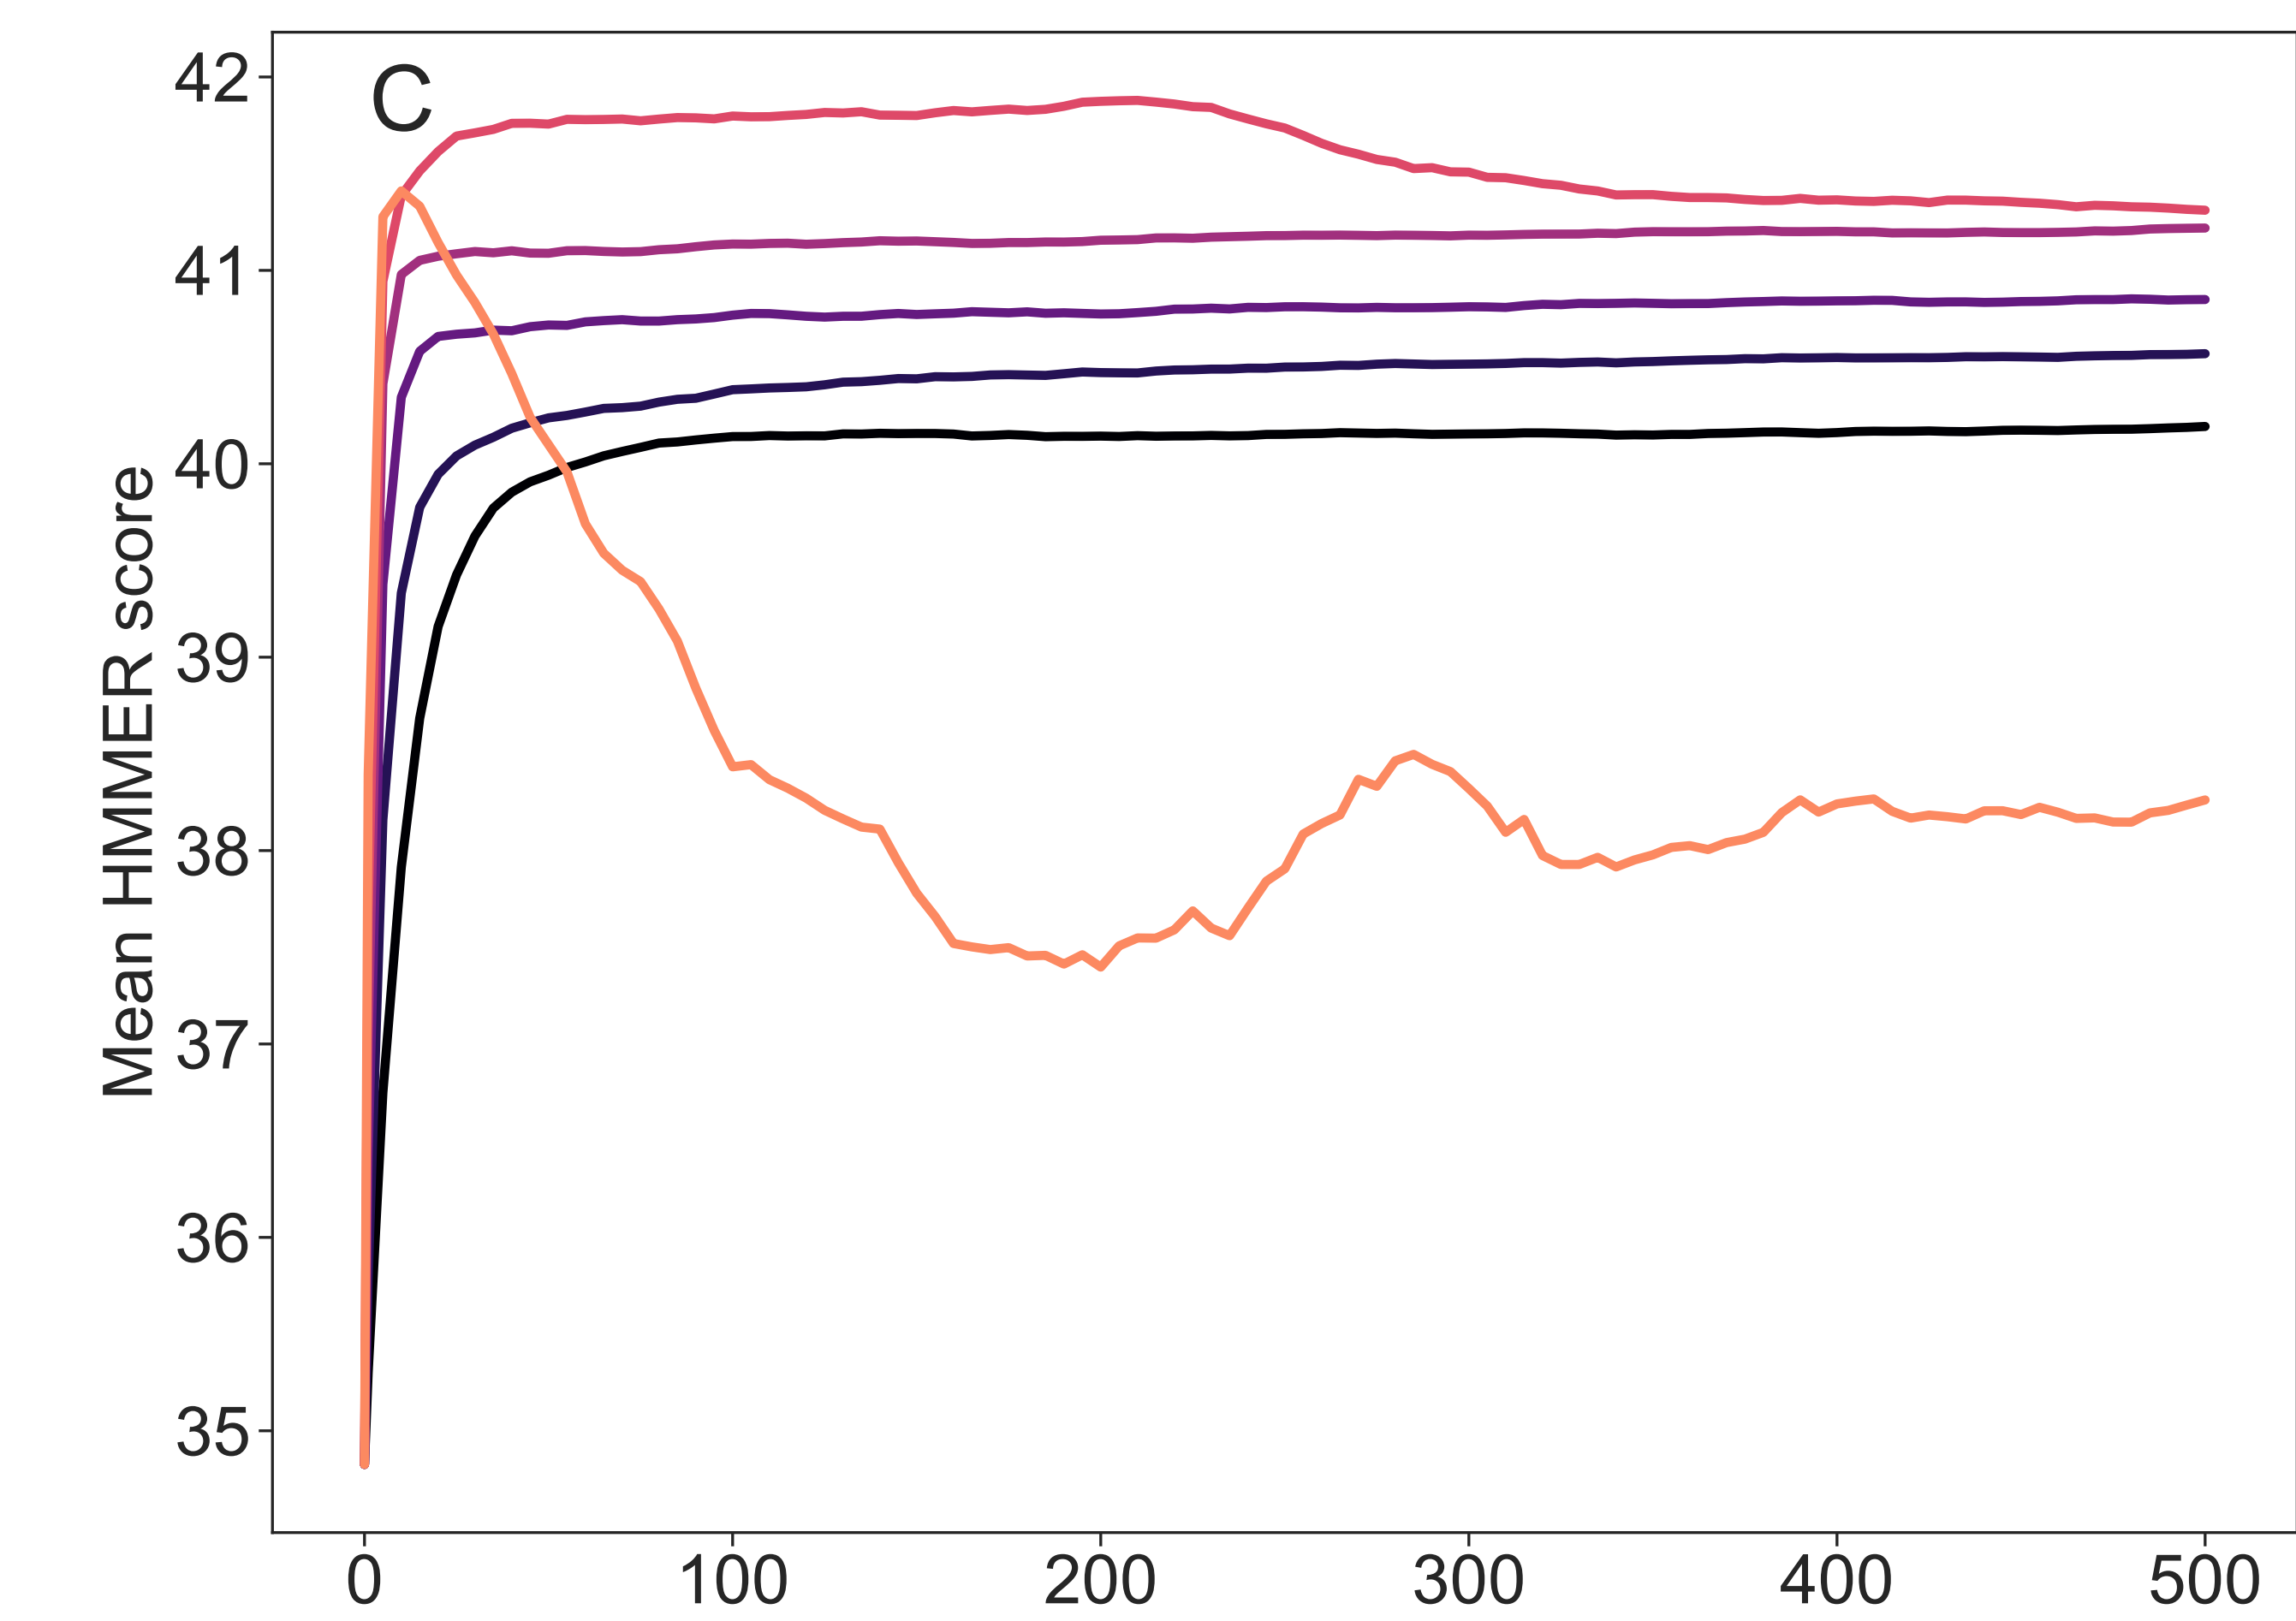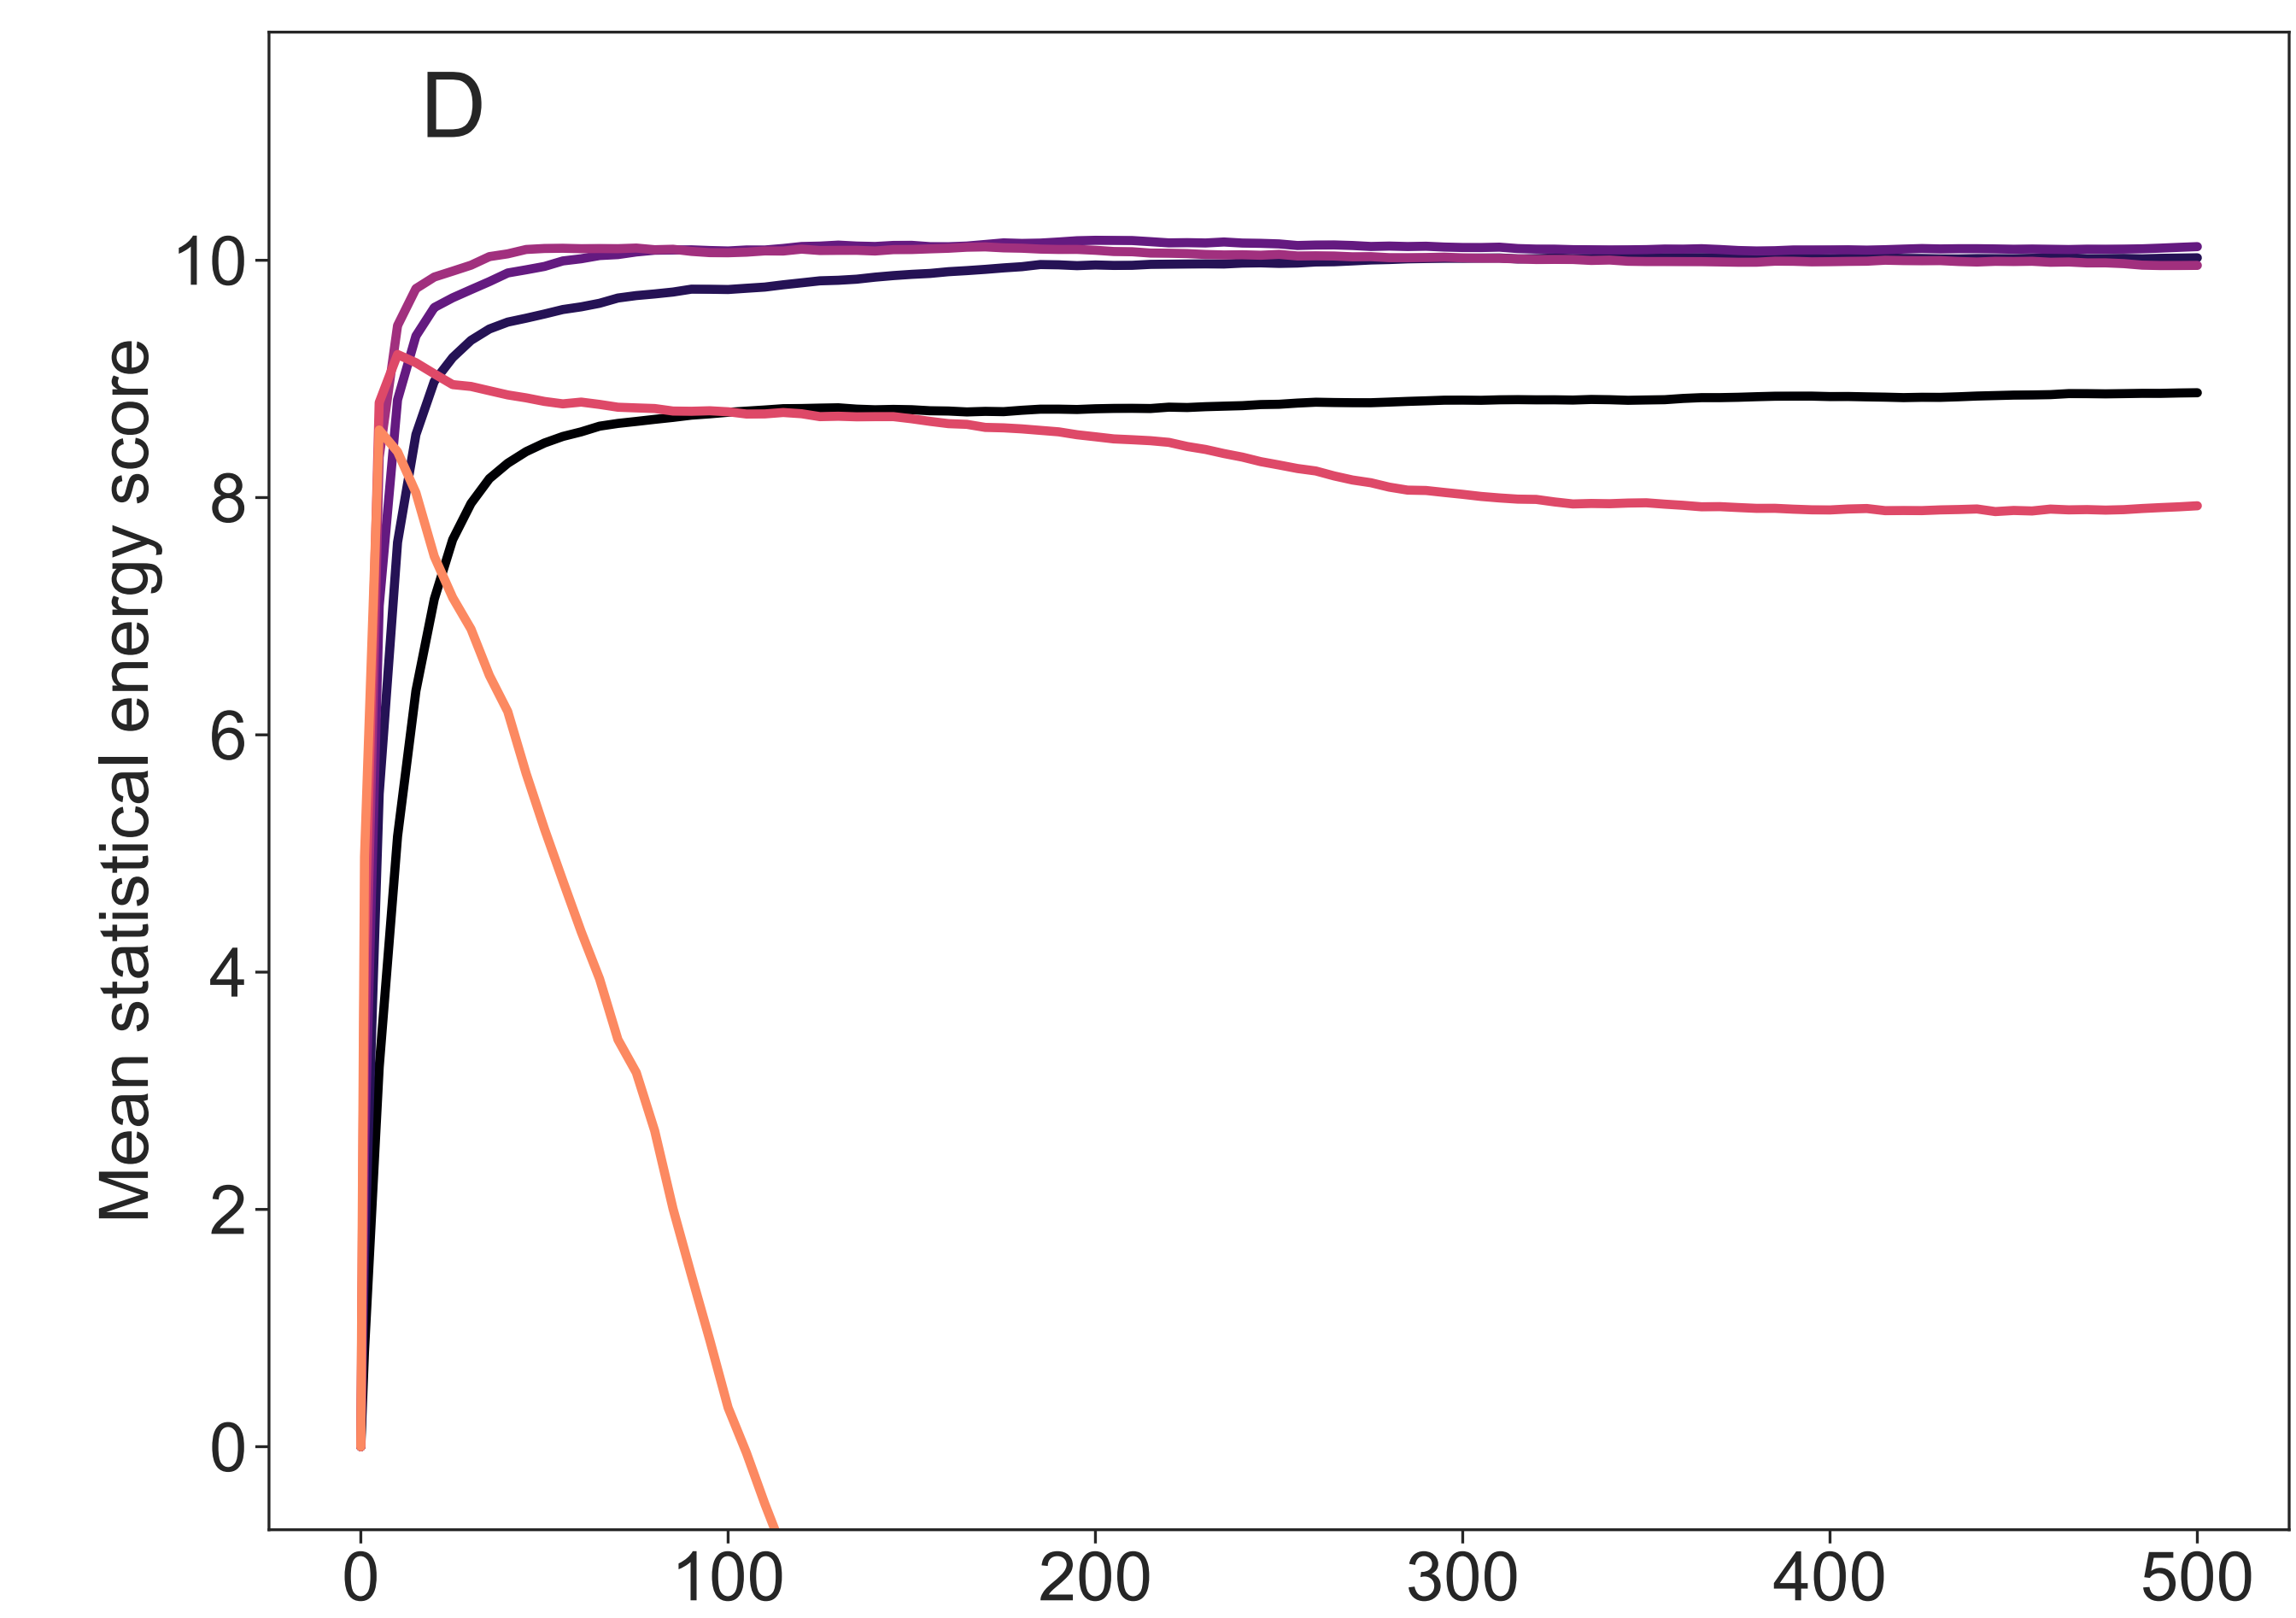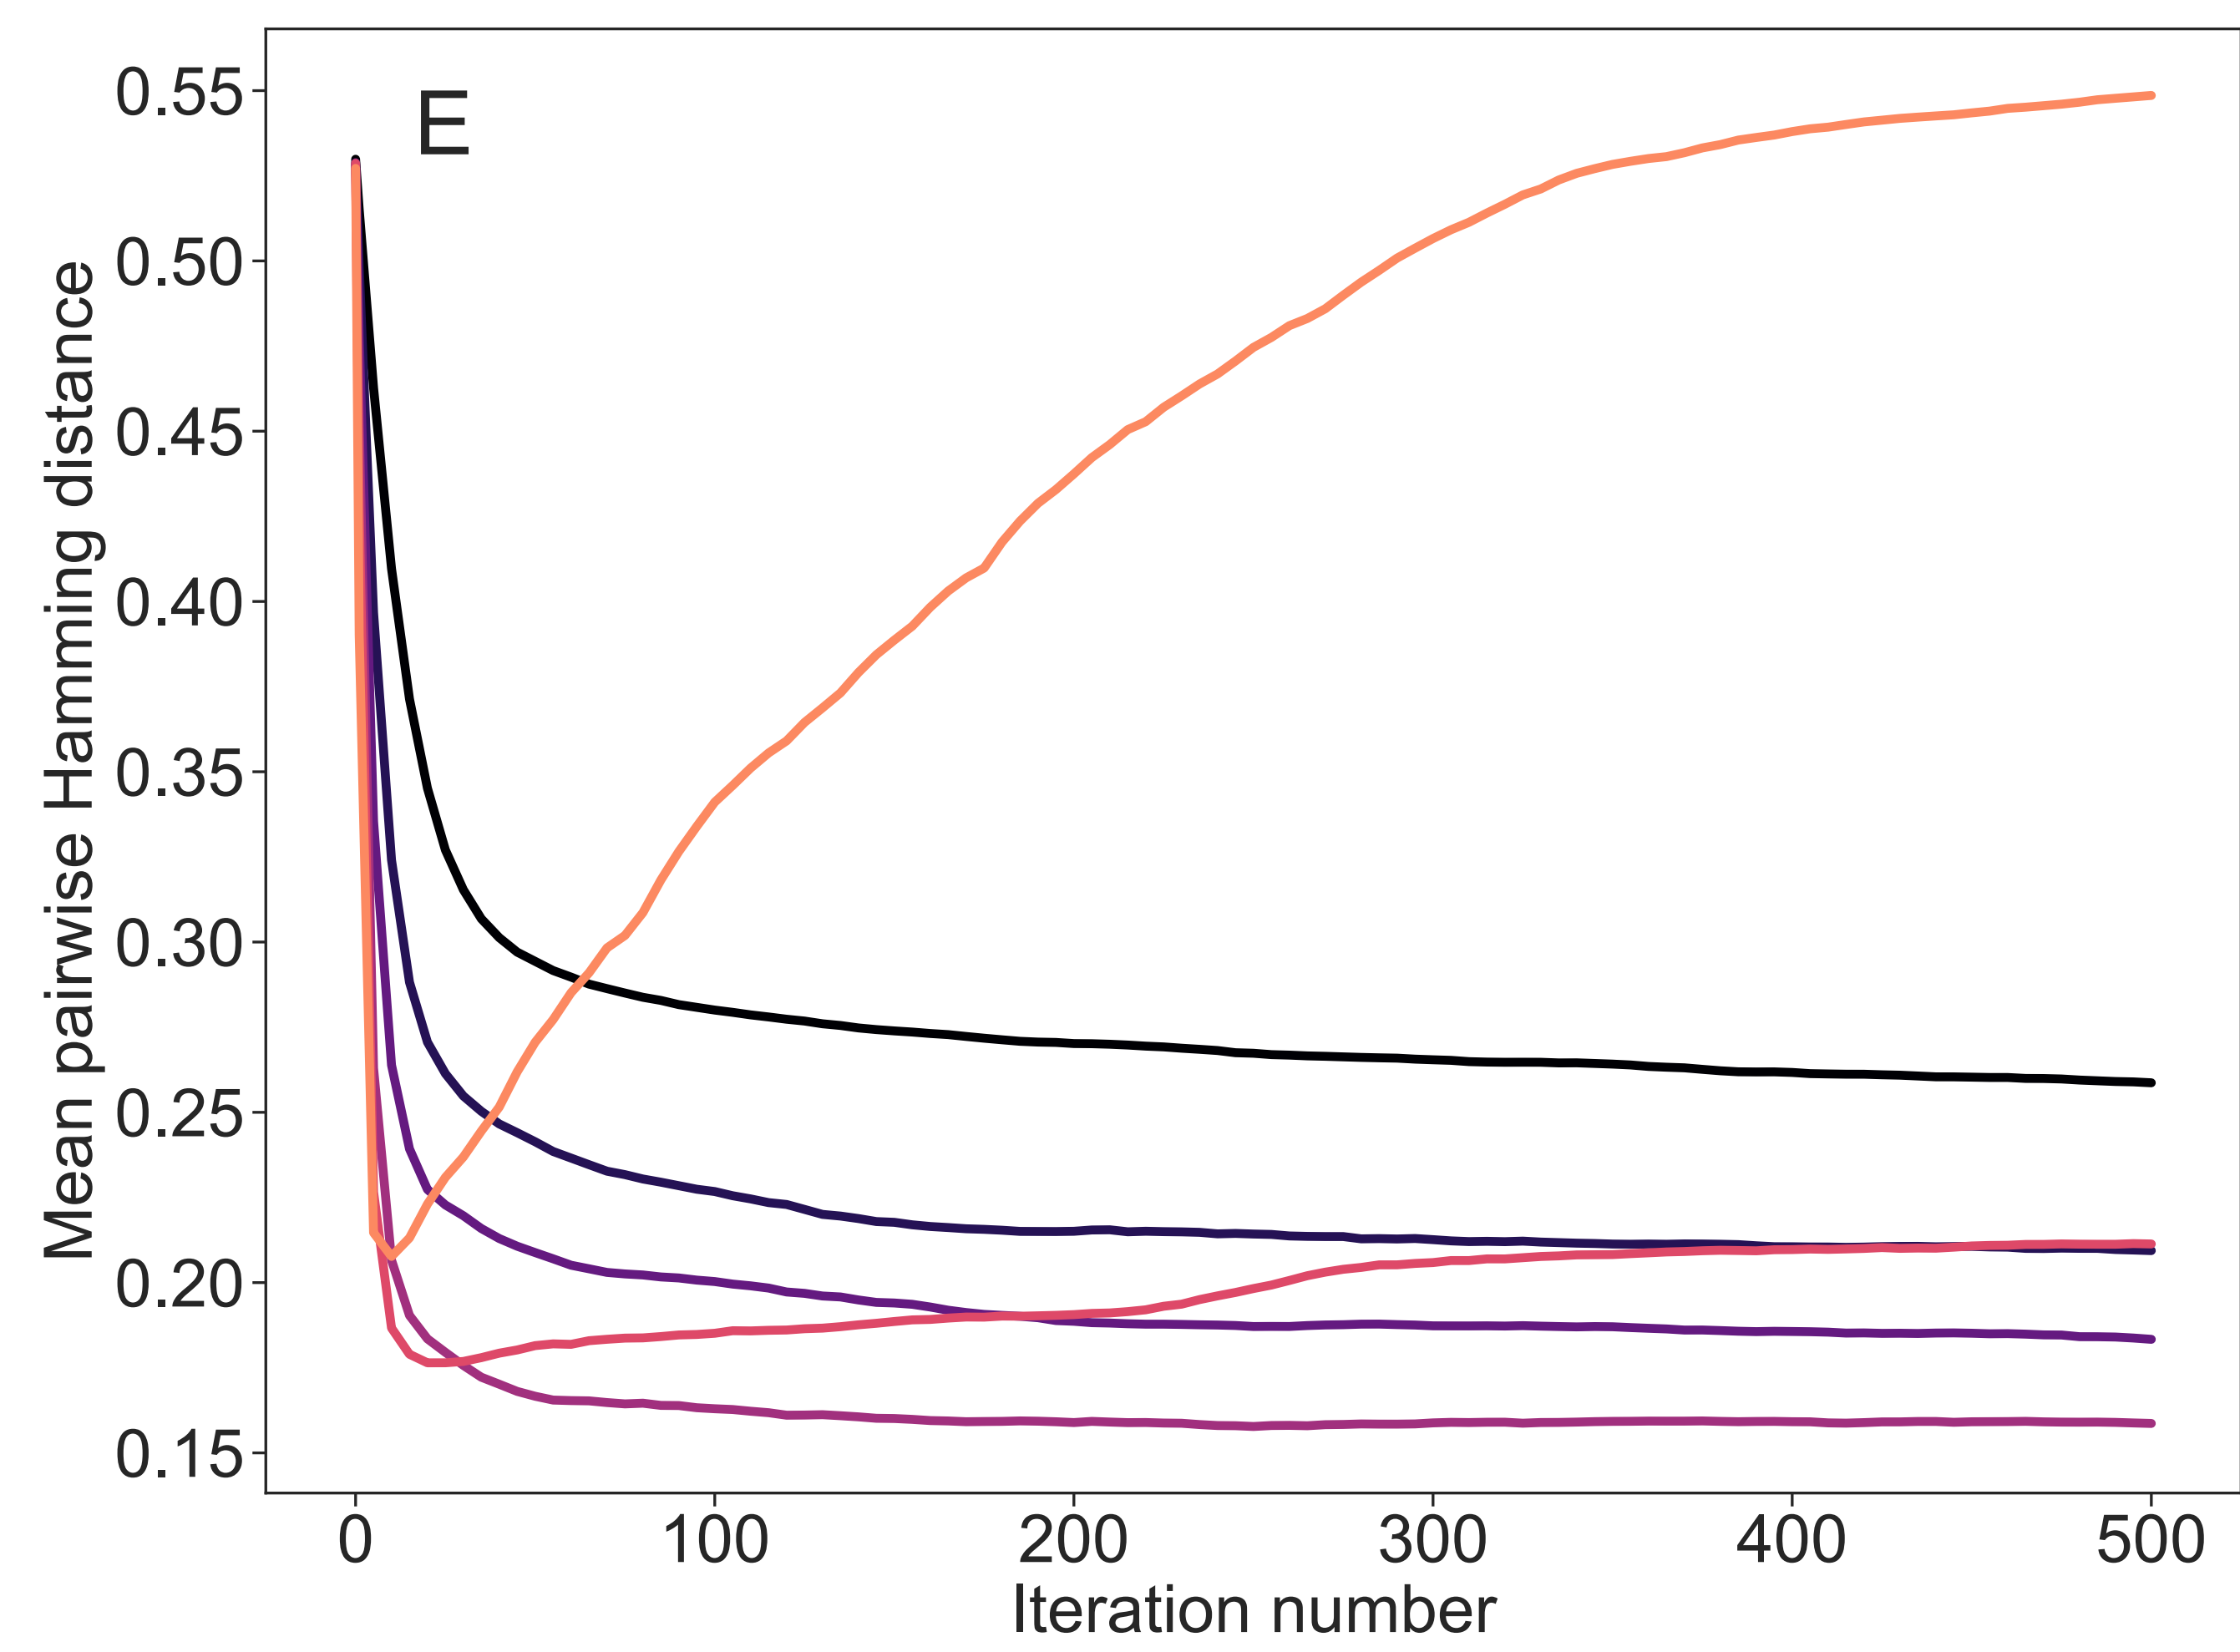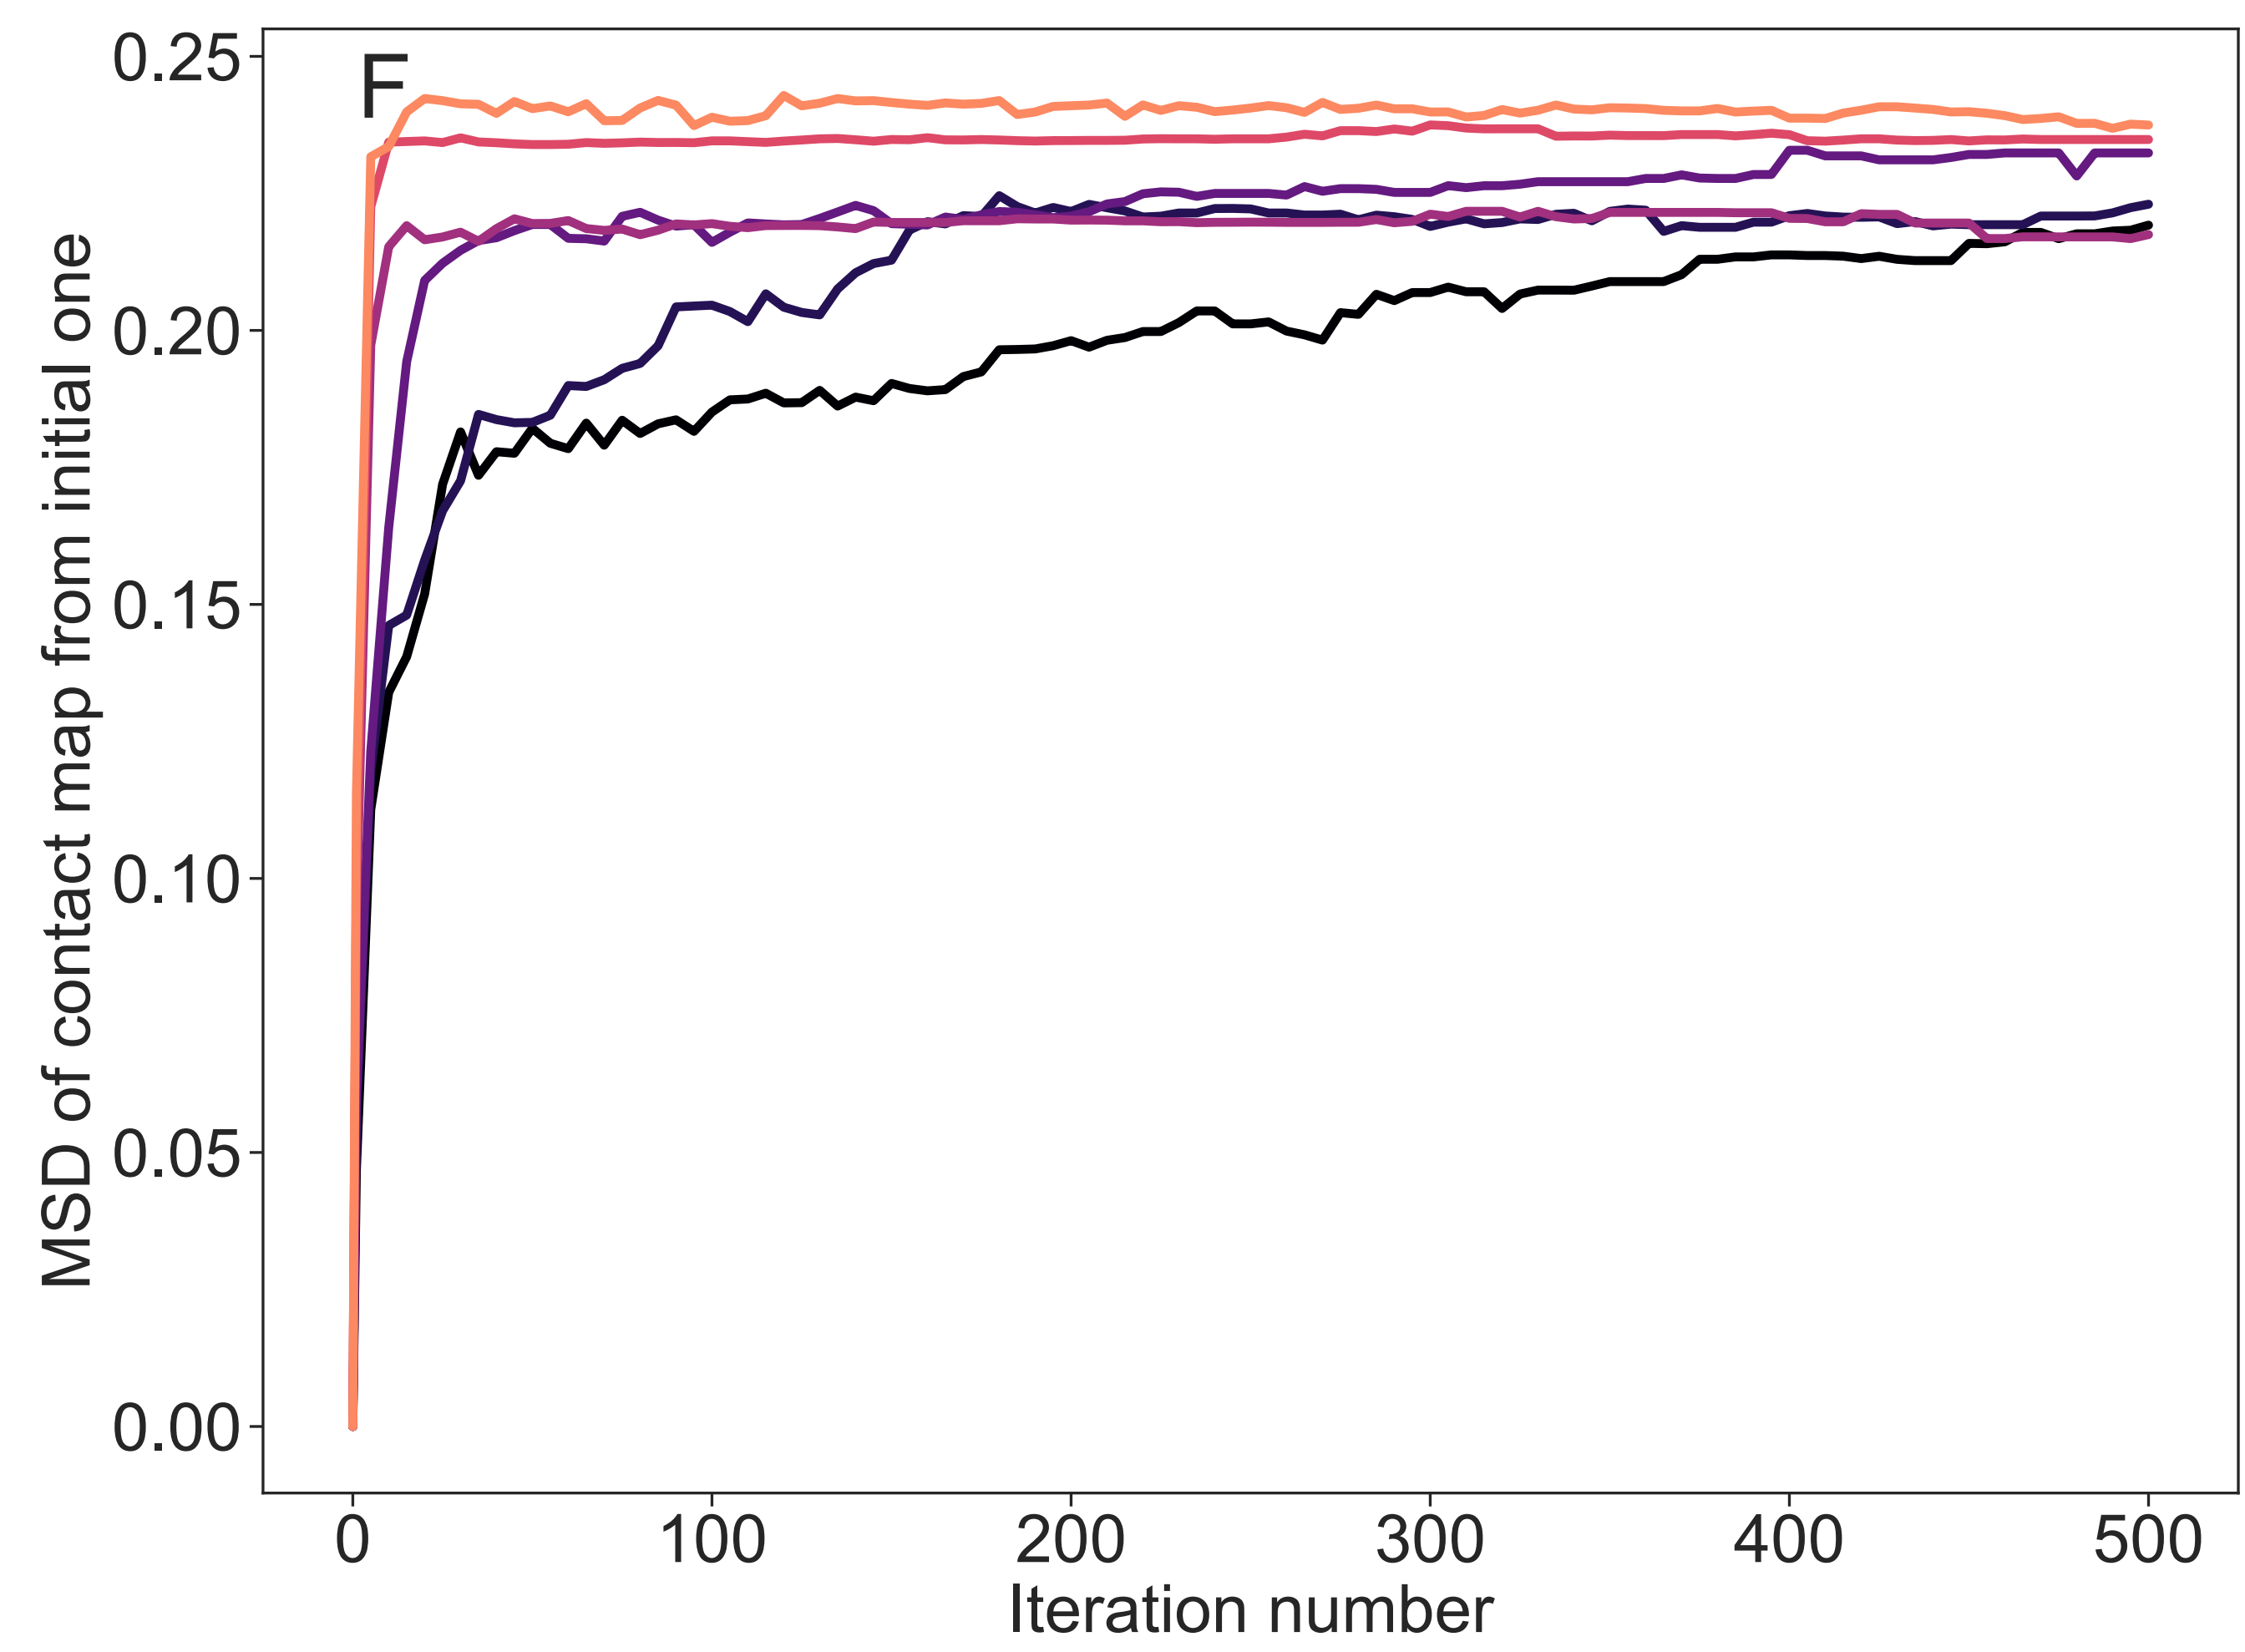

Supplement: supp [file elife-79854-supp-v1.zip]

PF00072

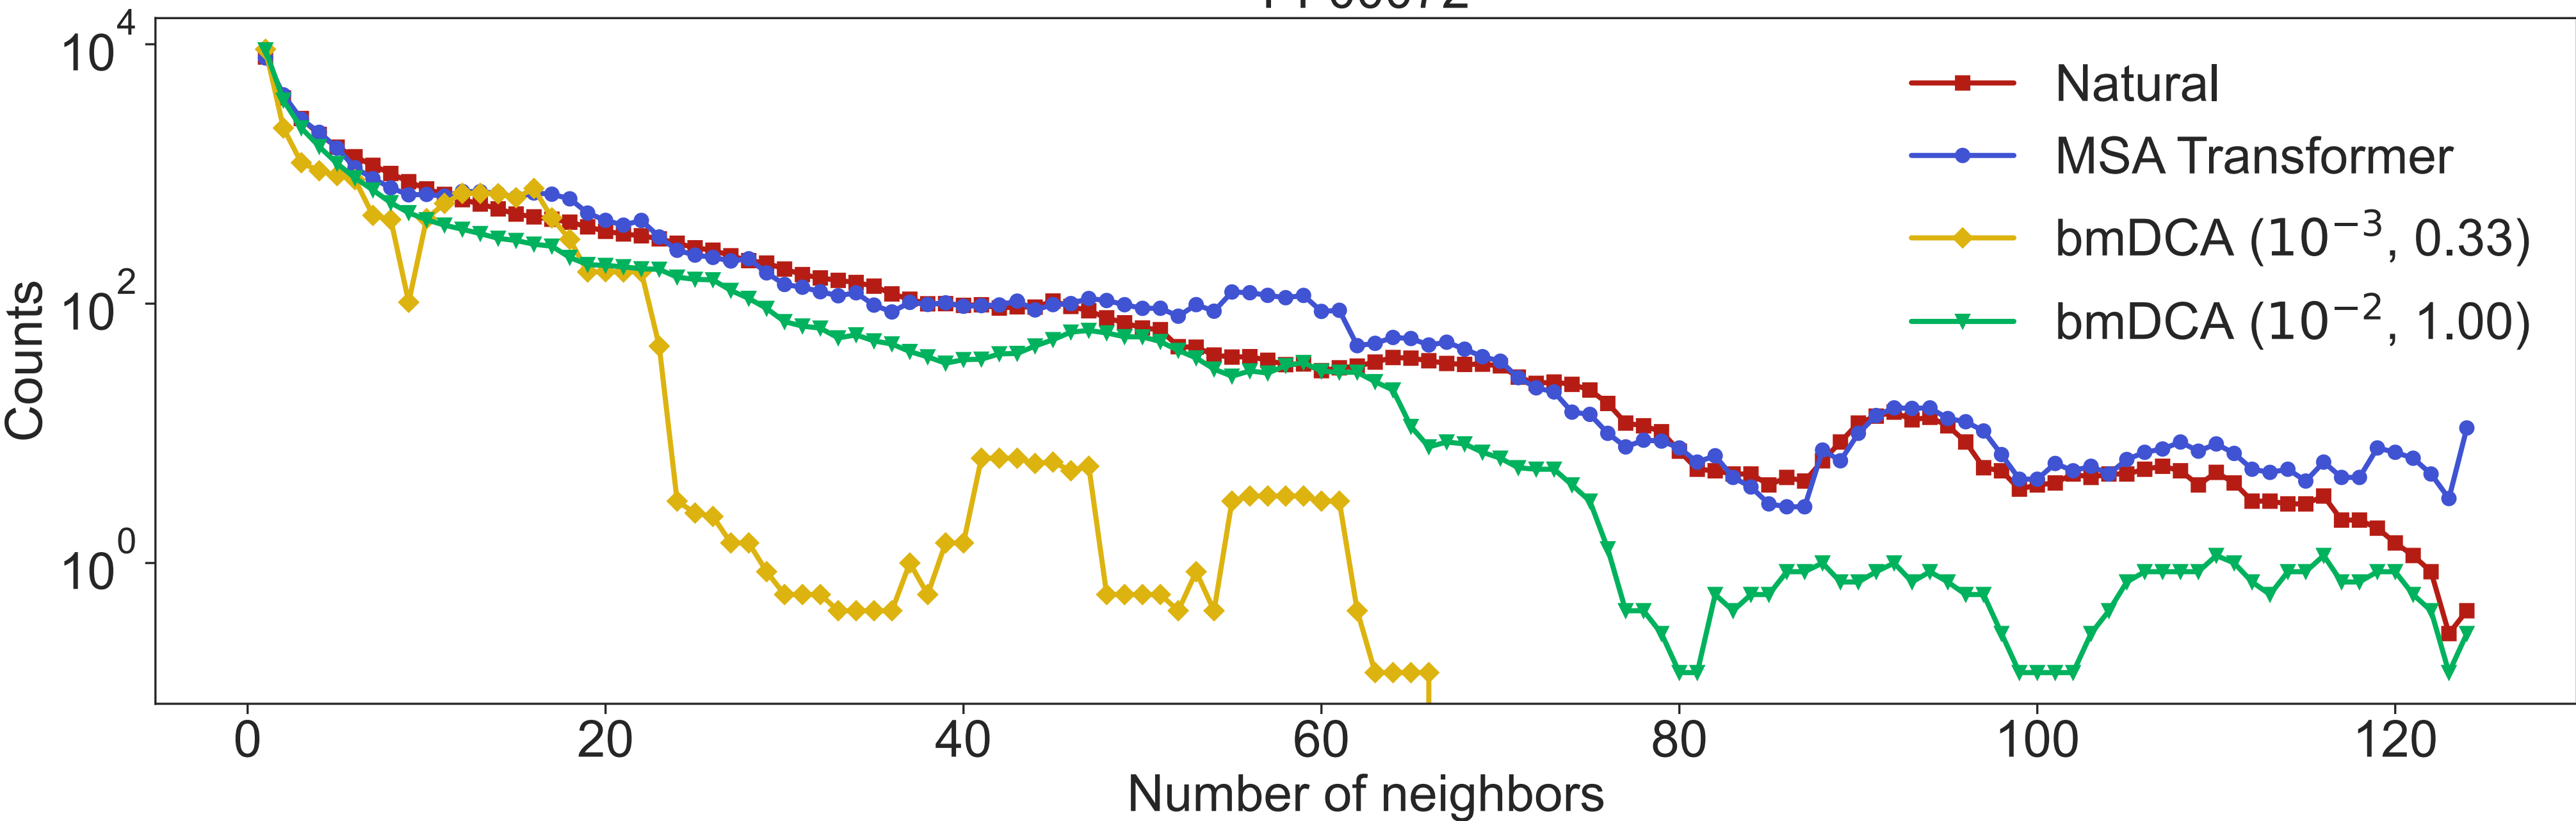

PF00153

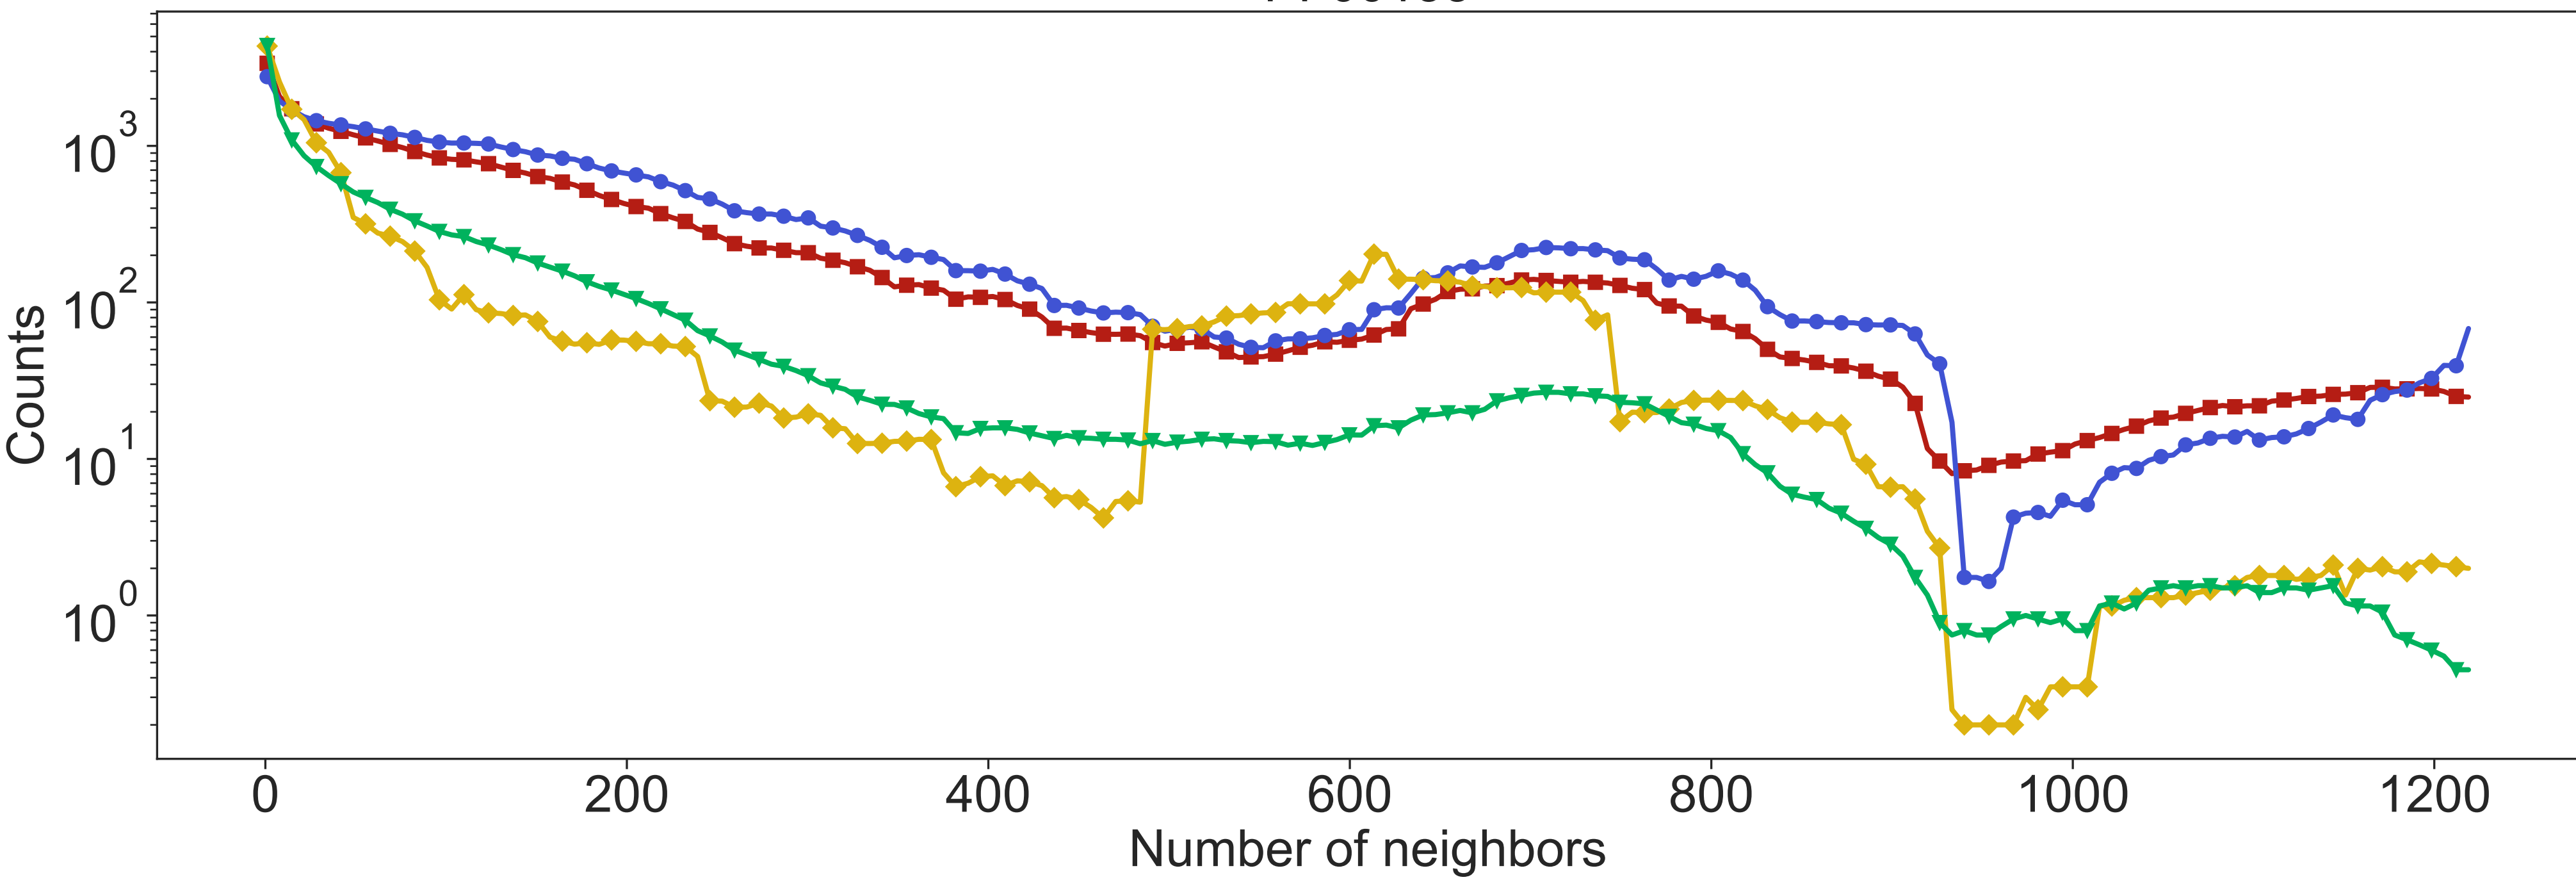

Supplement: supp [file elife-79854-supp-v1.zip]

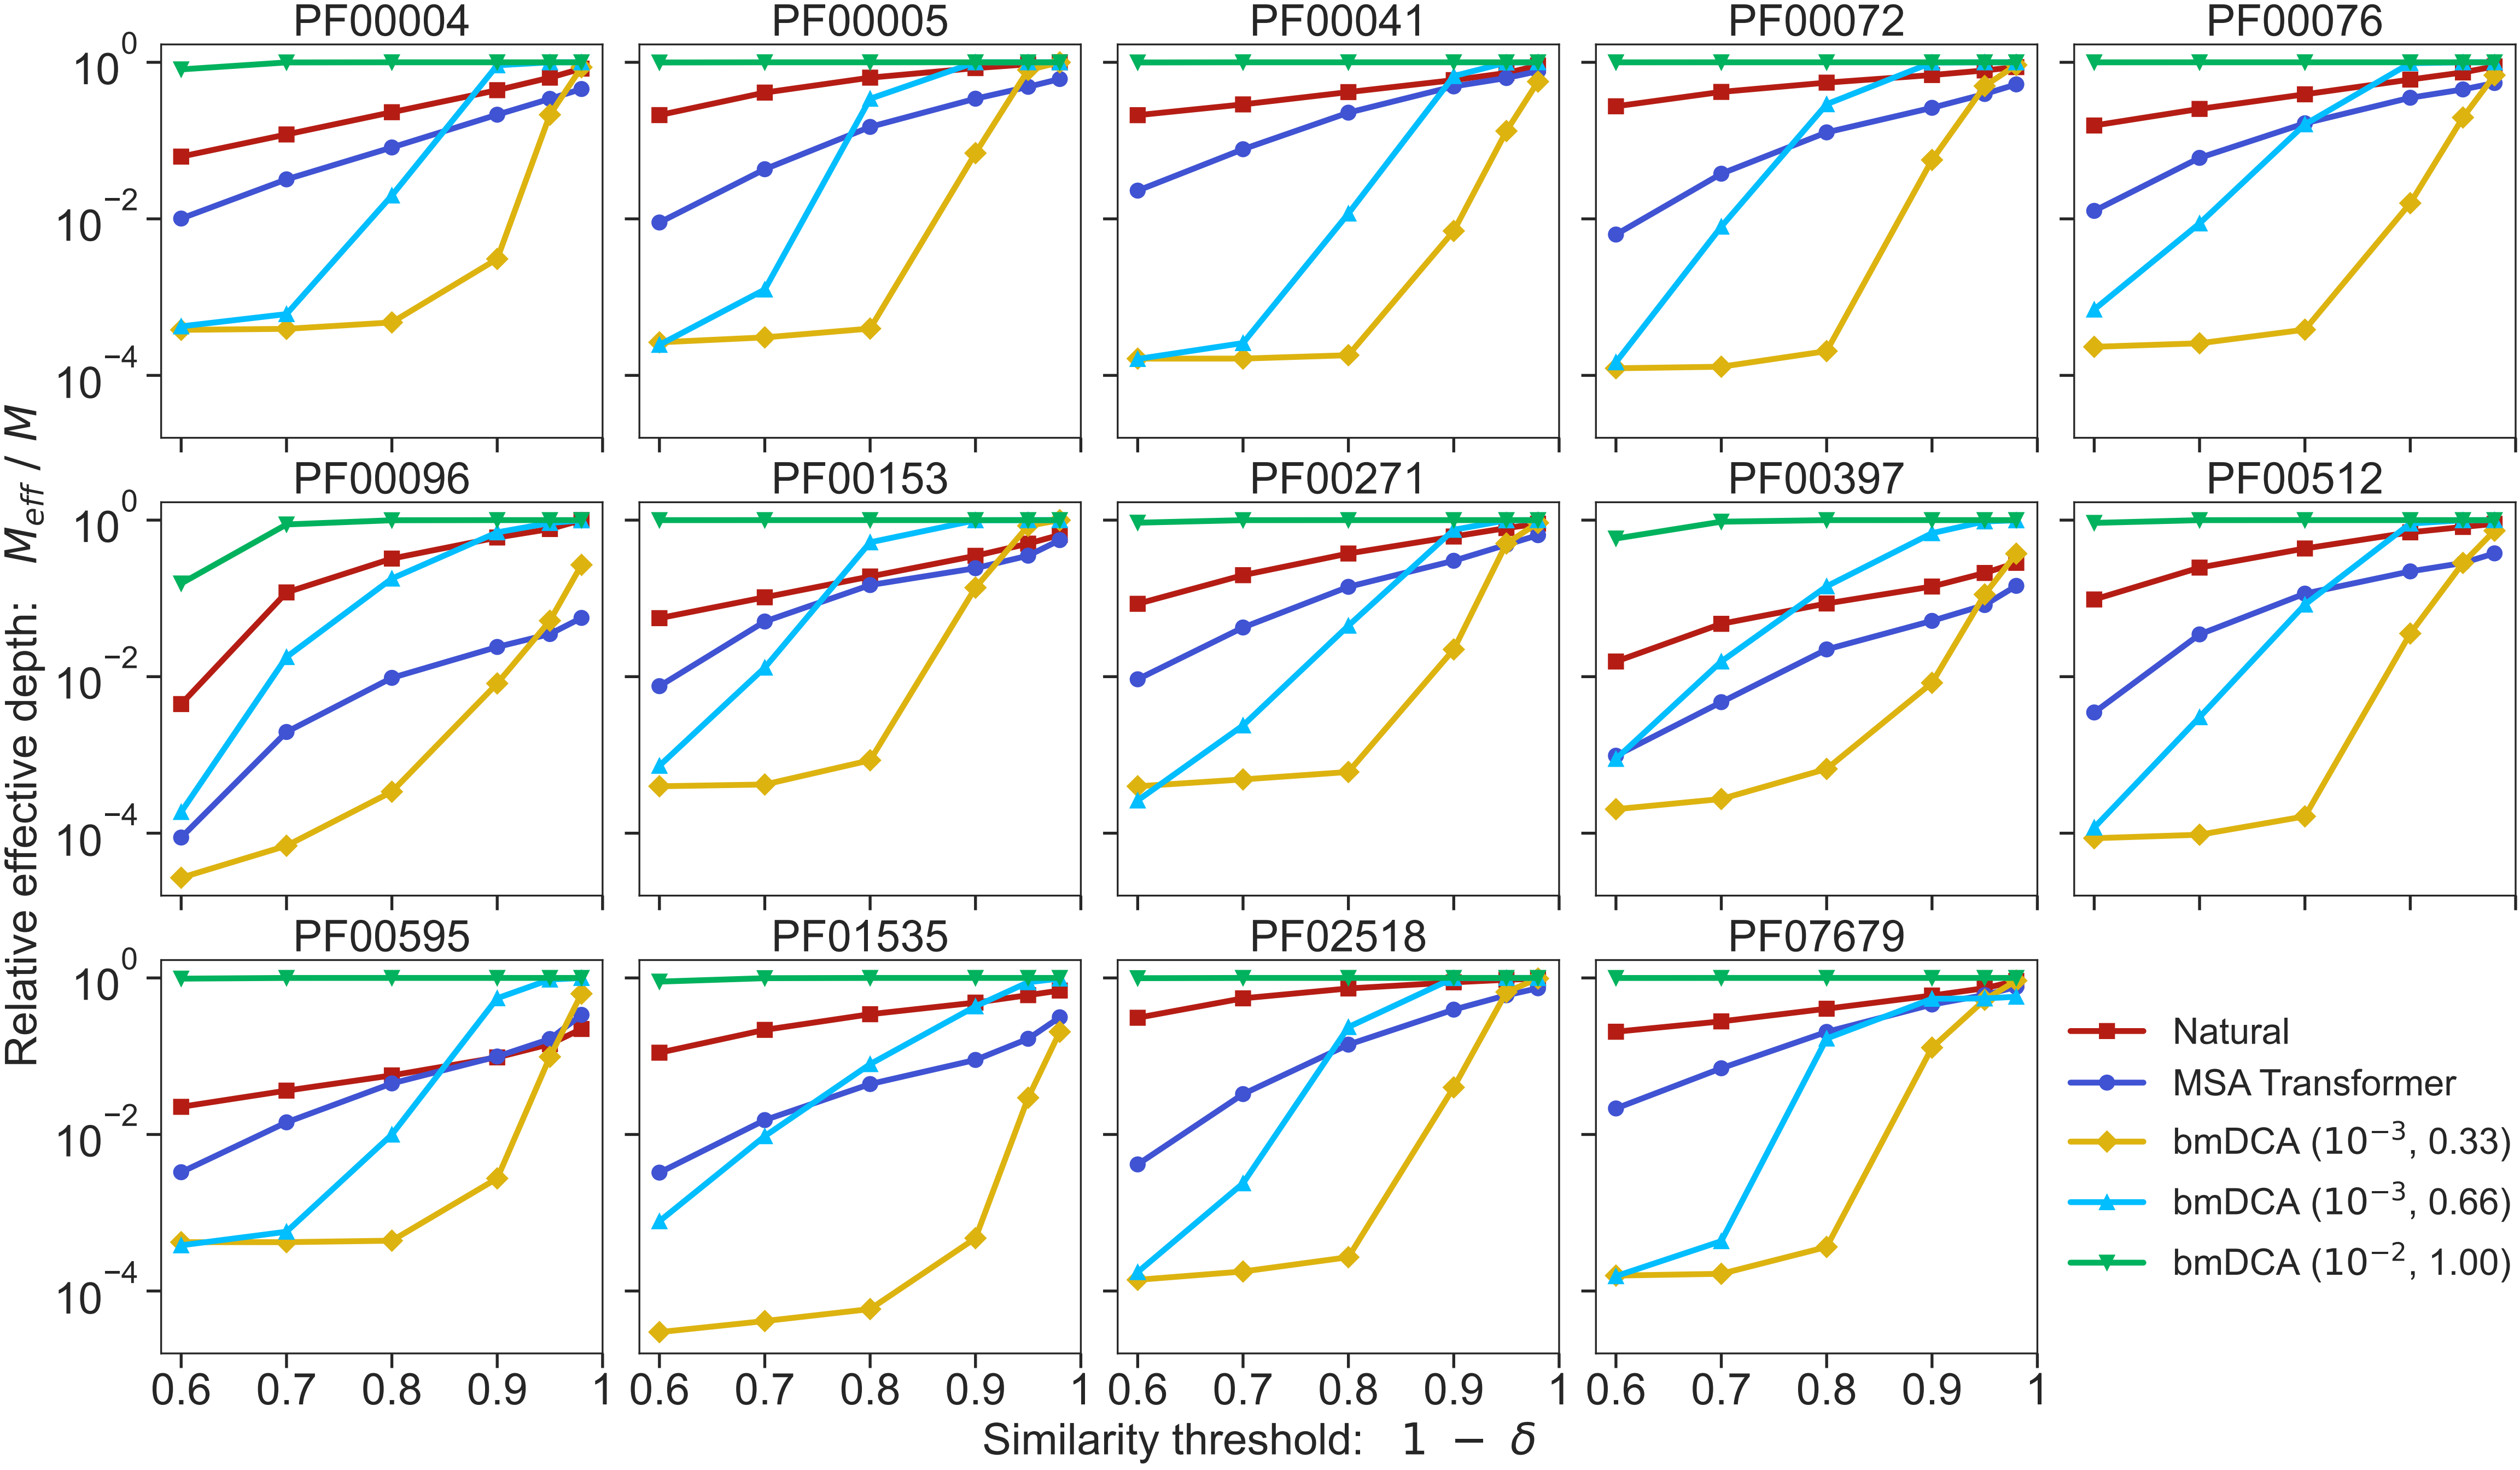

Supplement: supp [file elife-79854-supp-v1.zip]

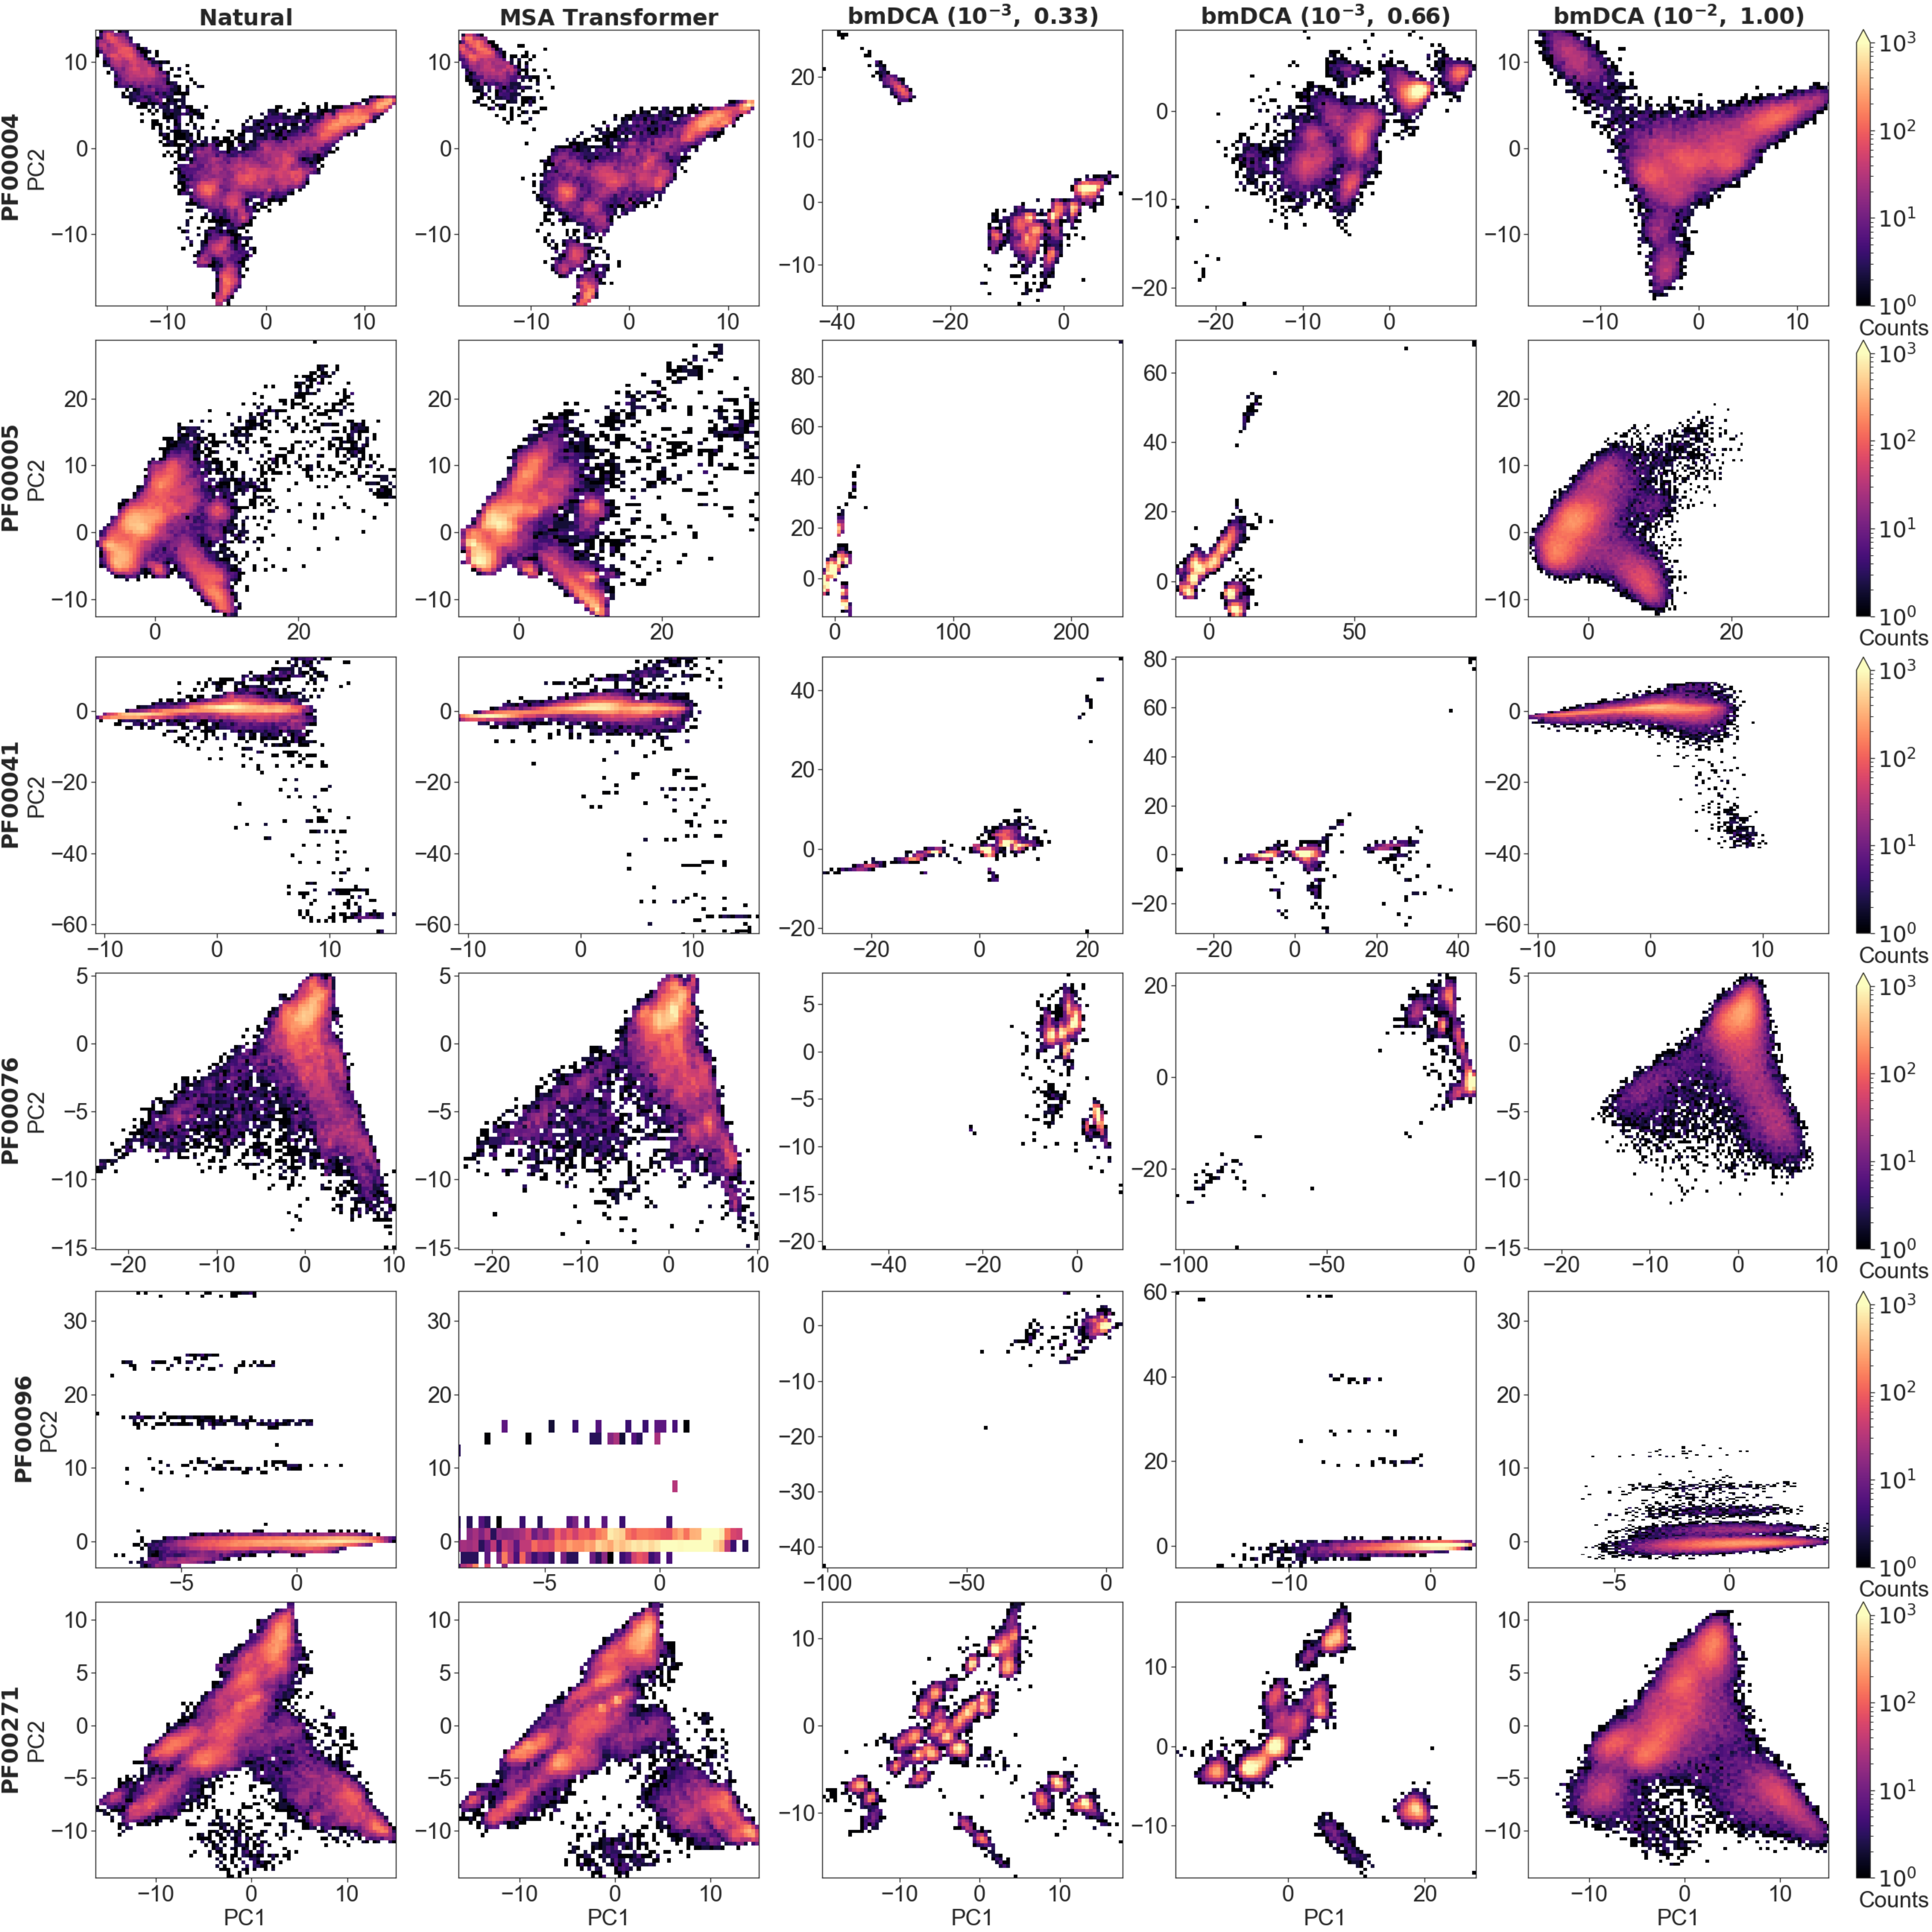

Supplement: supp [file elife-79854-supp-v1.zip]

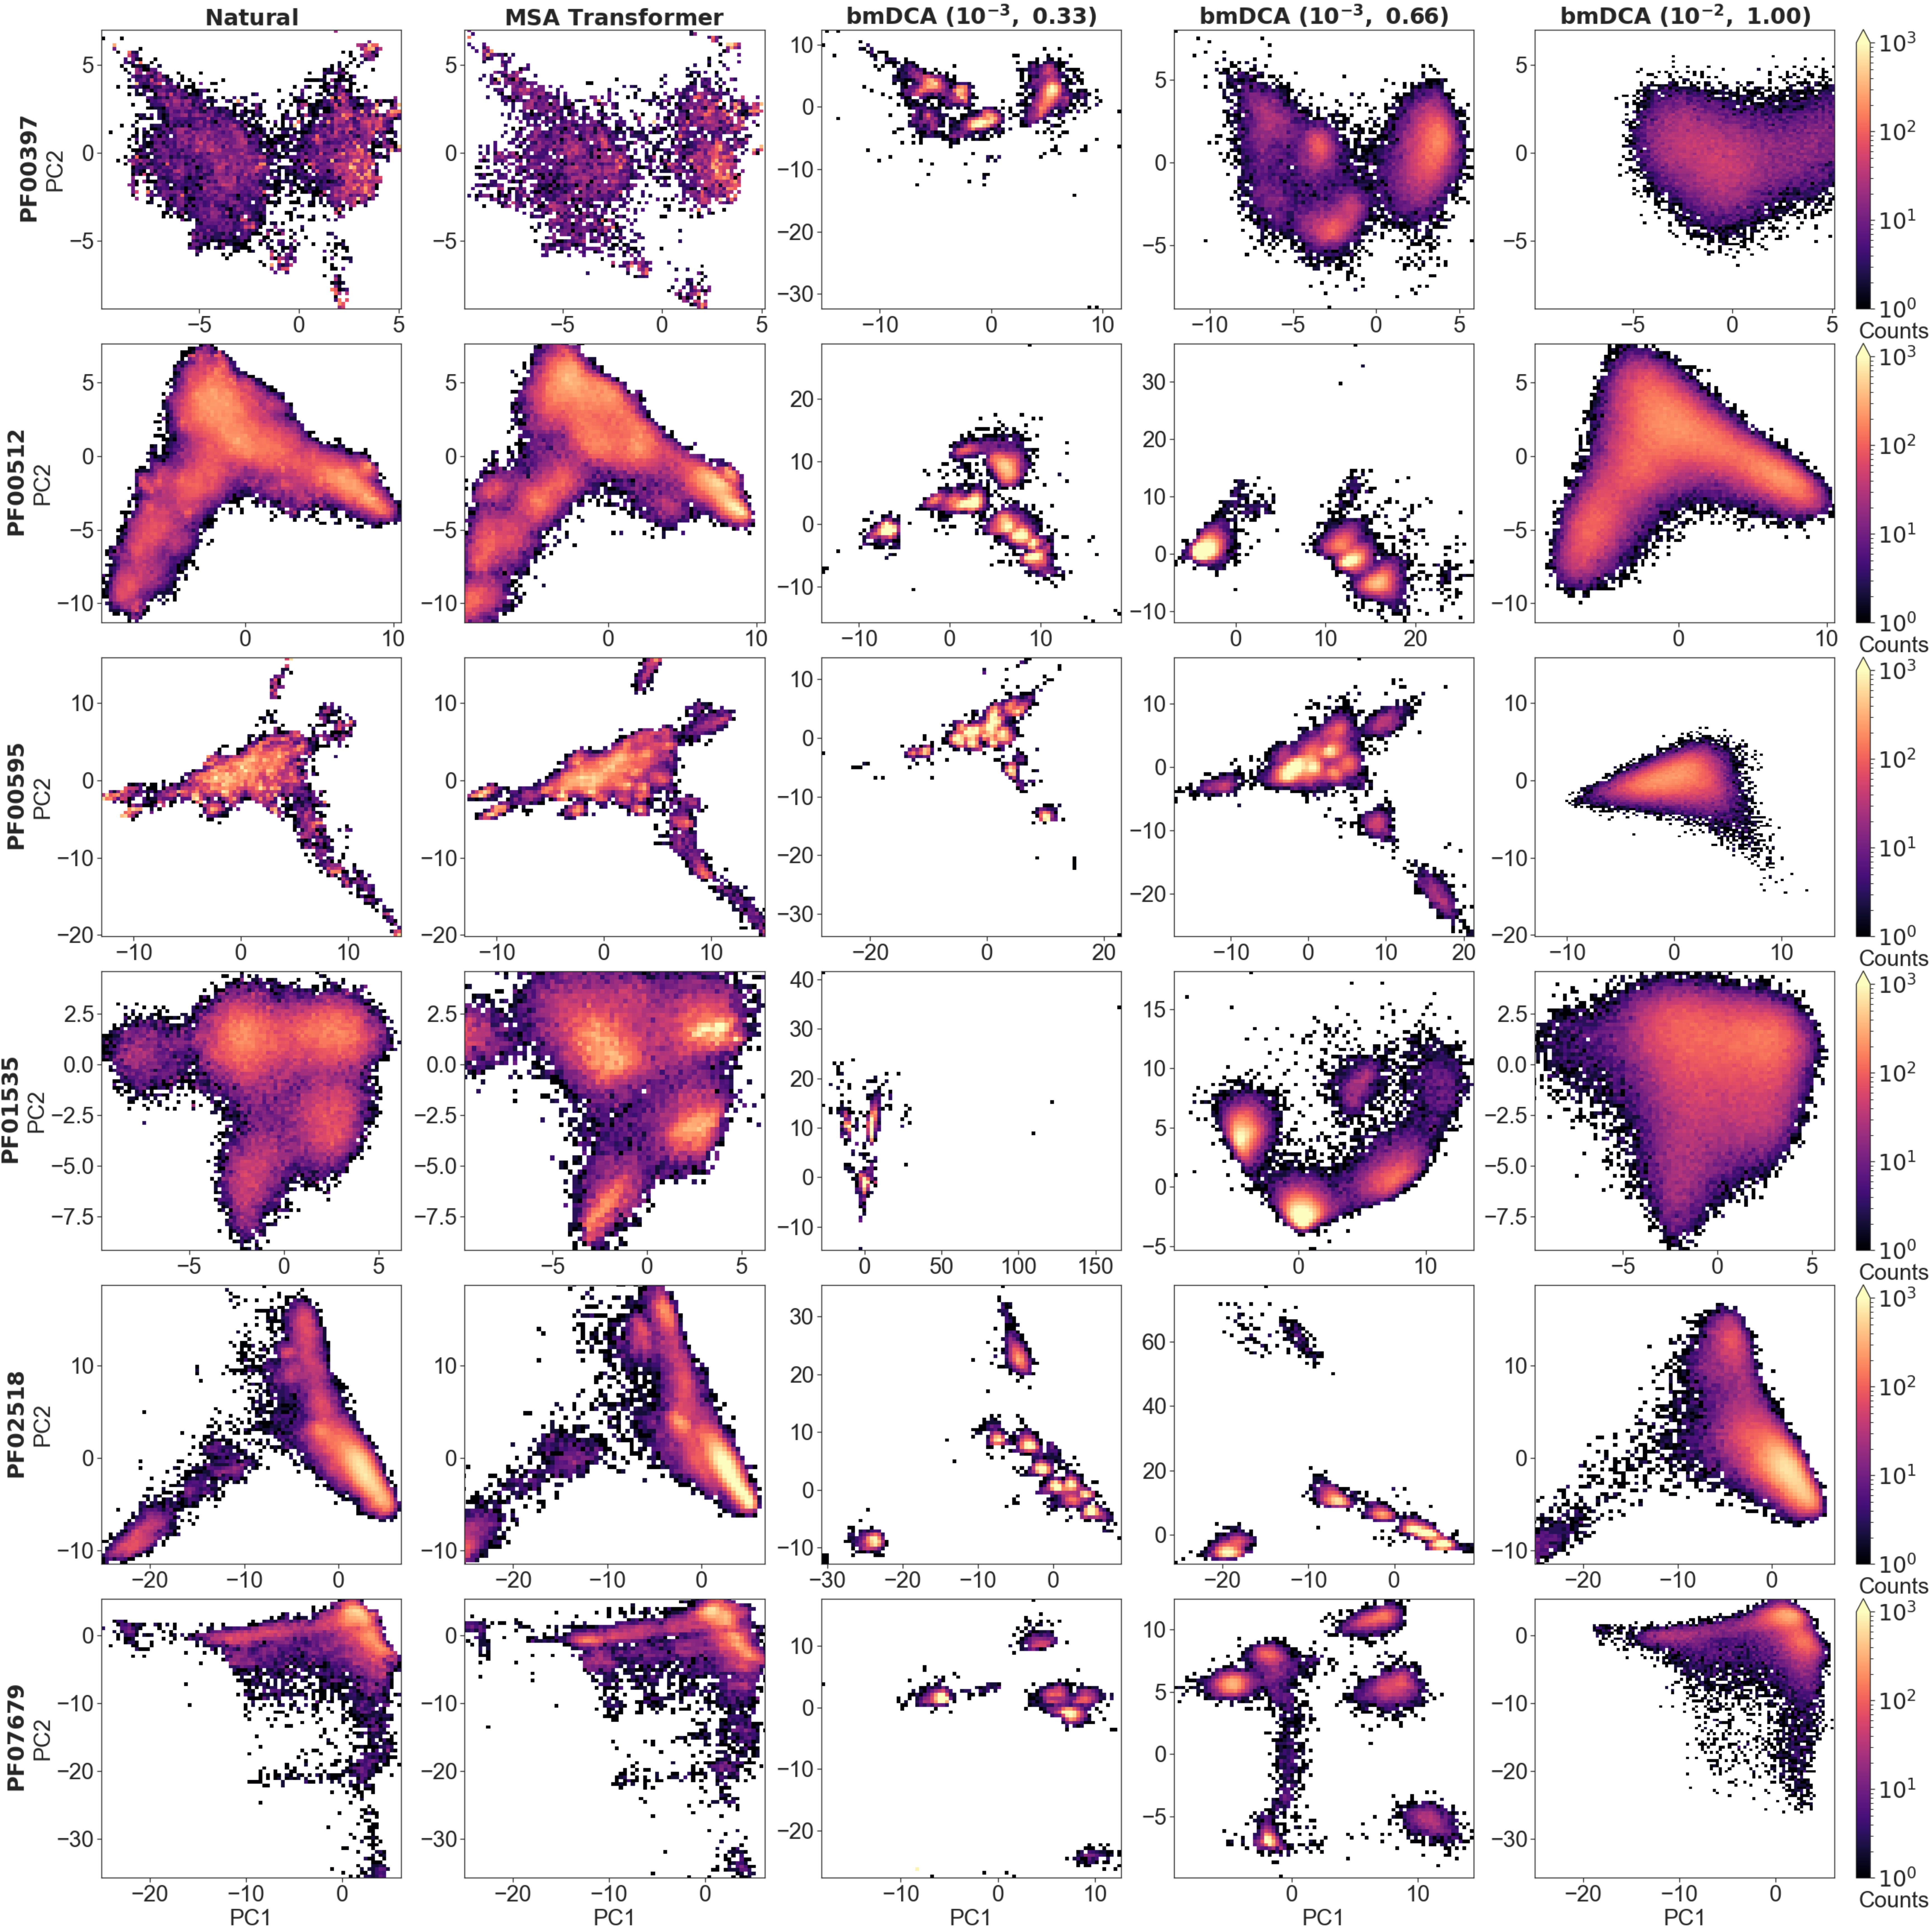

Supplement: supp [file elife-79854-supp-v1.zip]

## Two – body Correlations

$C_{i,j}(x, y)$ , generated data

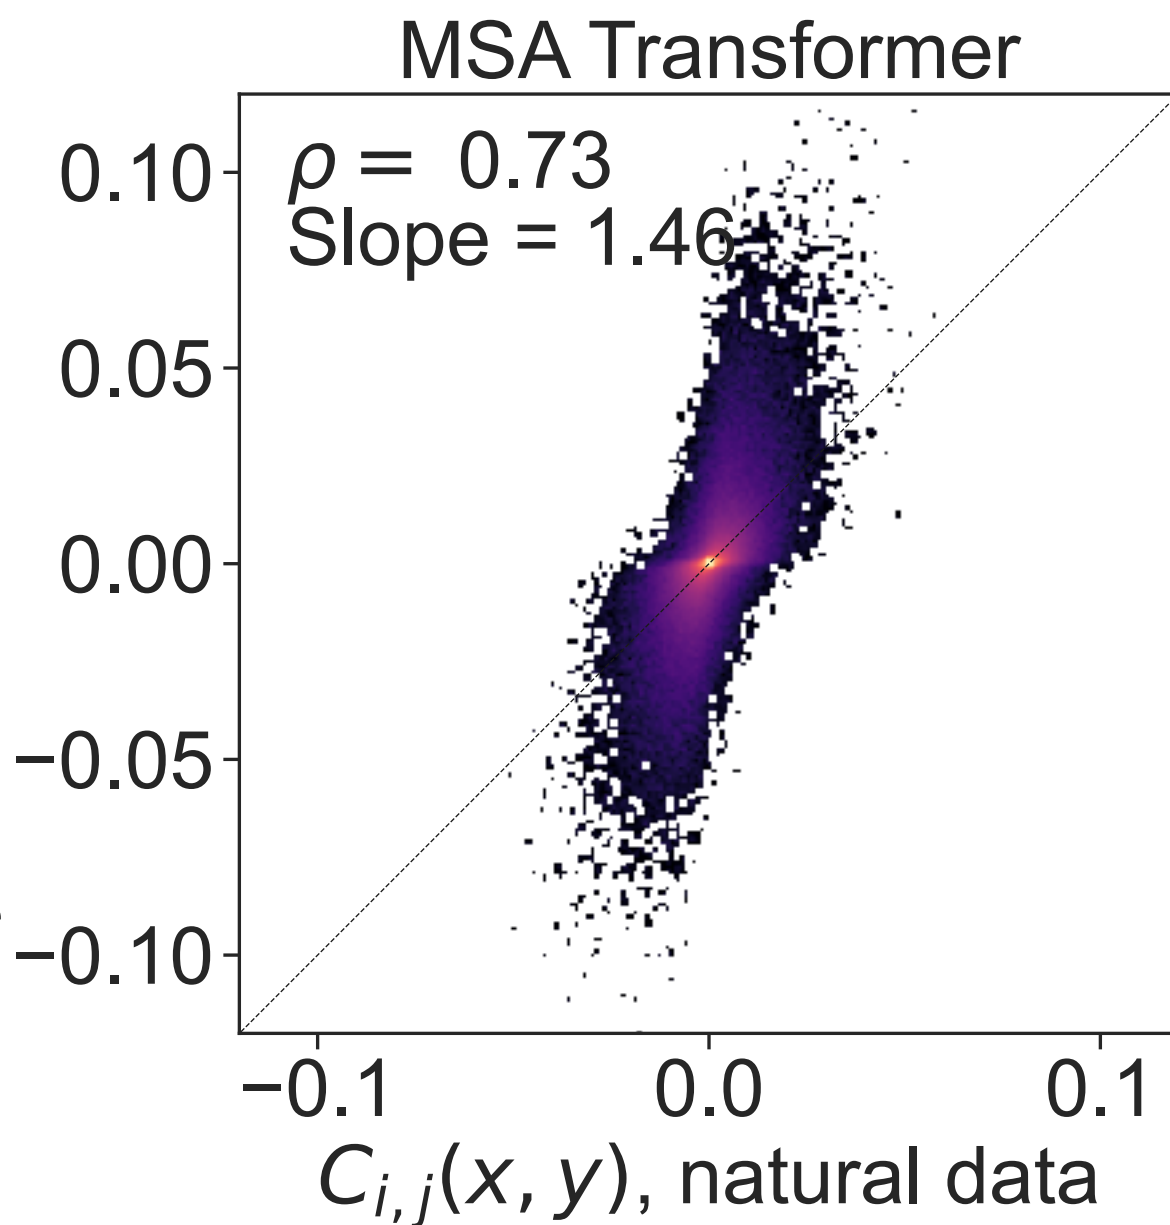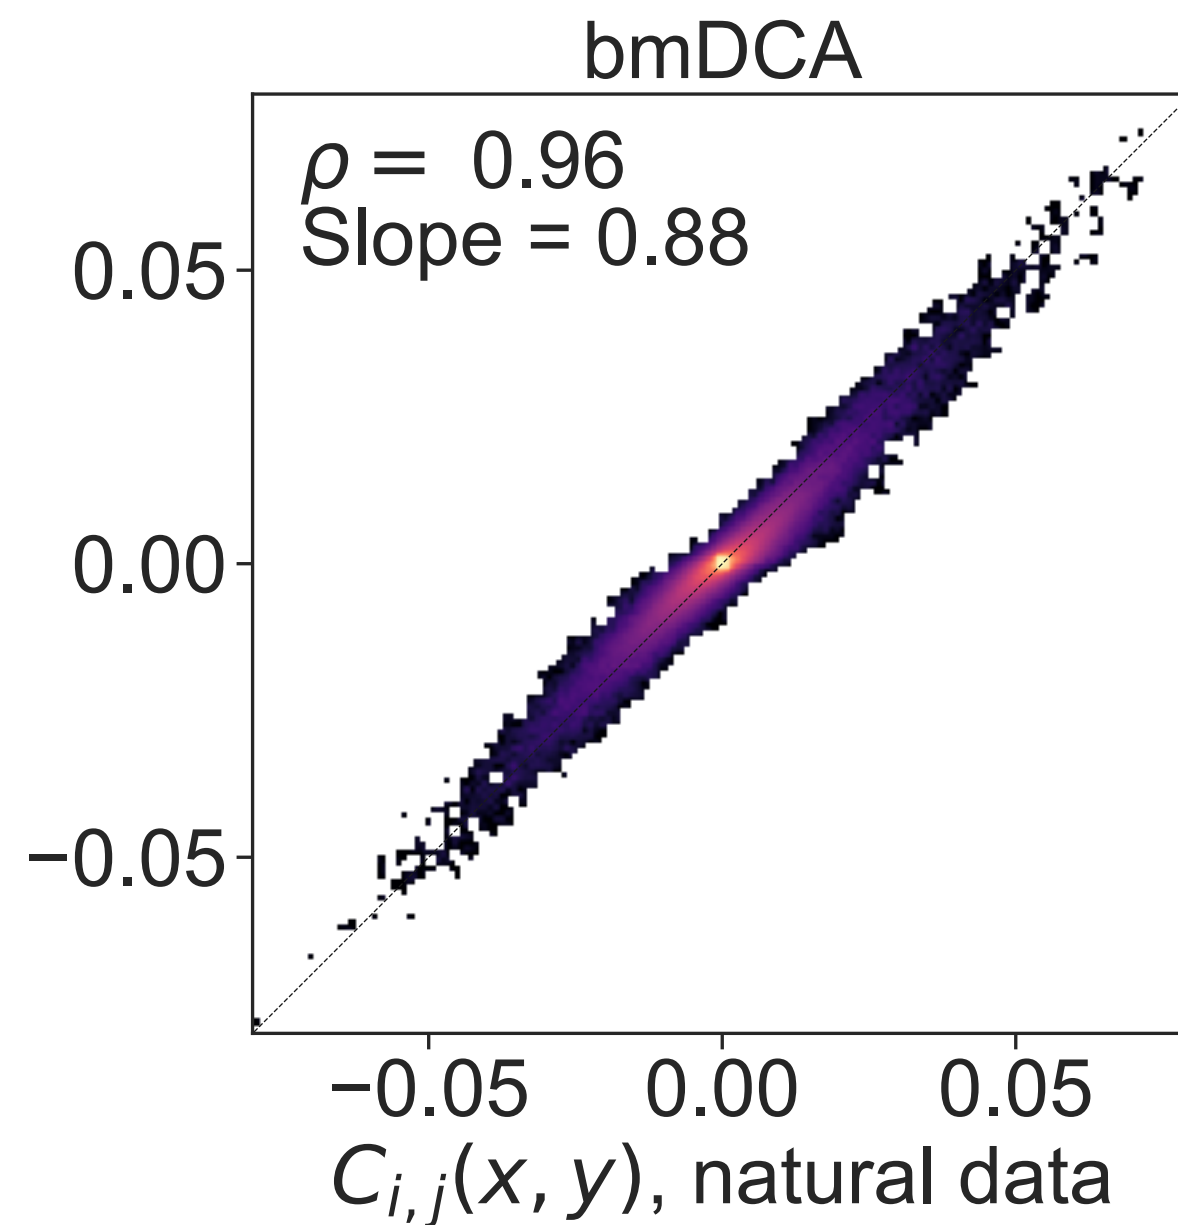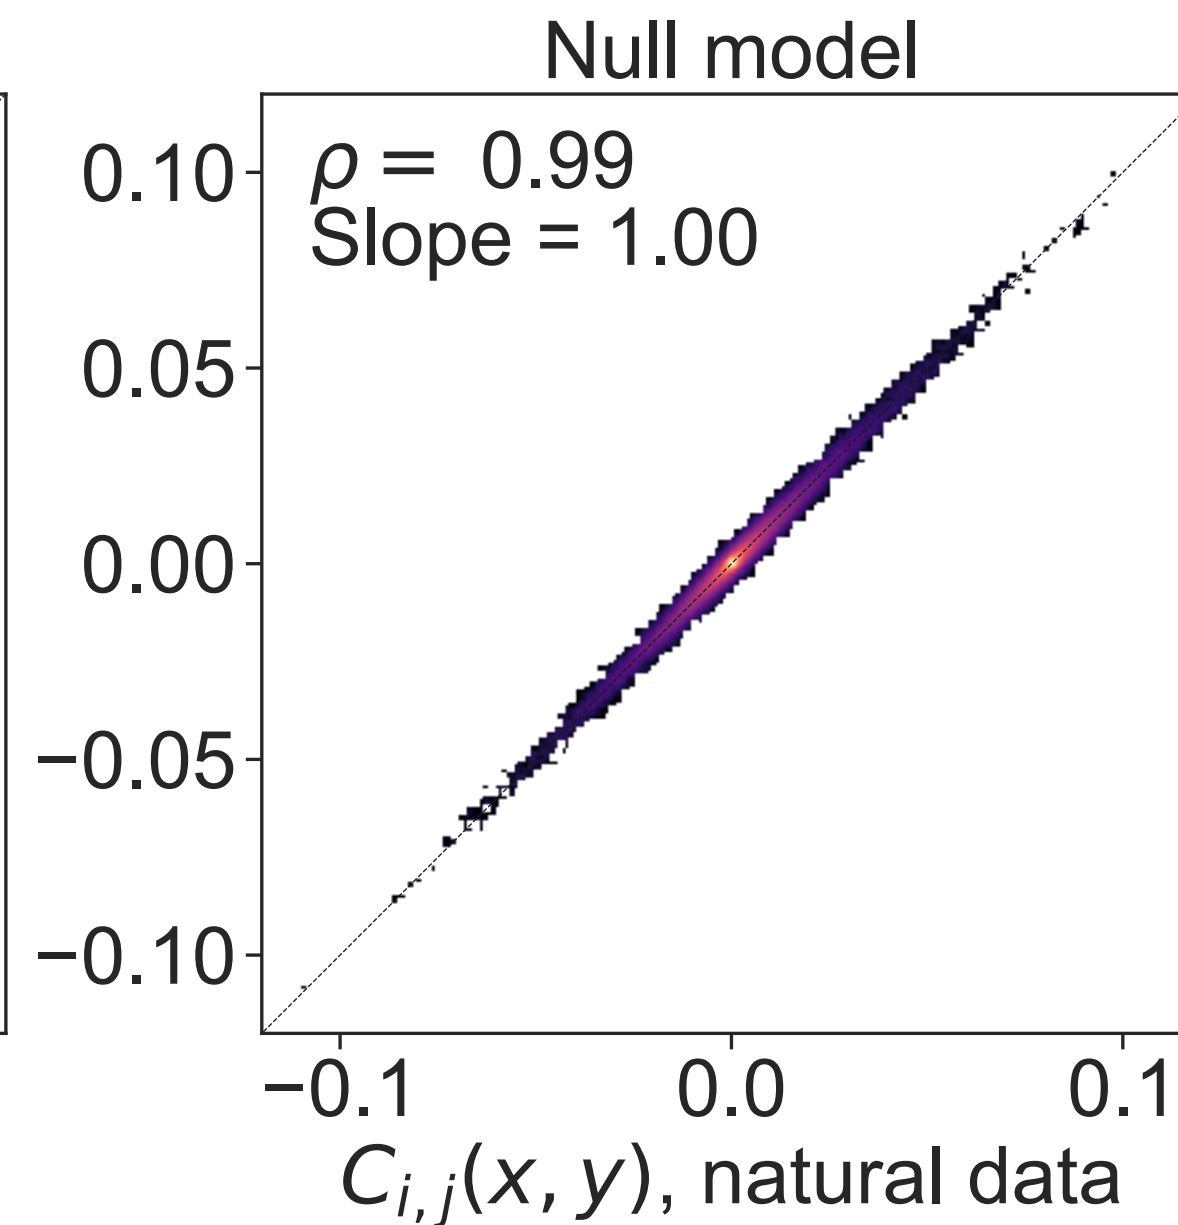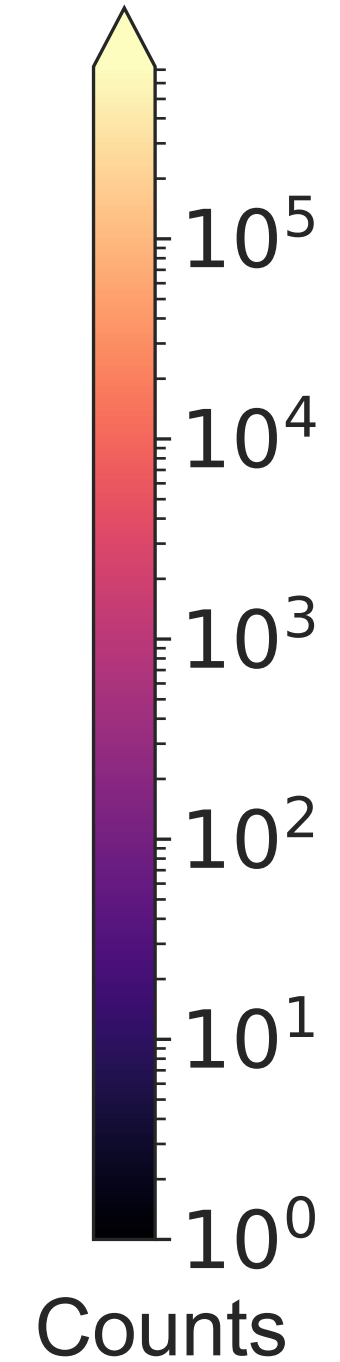

## Three – body Correlations

$C_{i,j,k}(x, y, z)$ , generated data

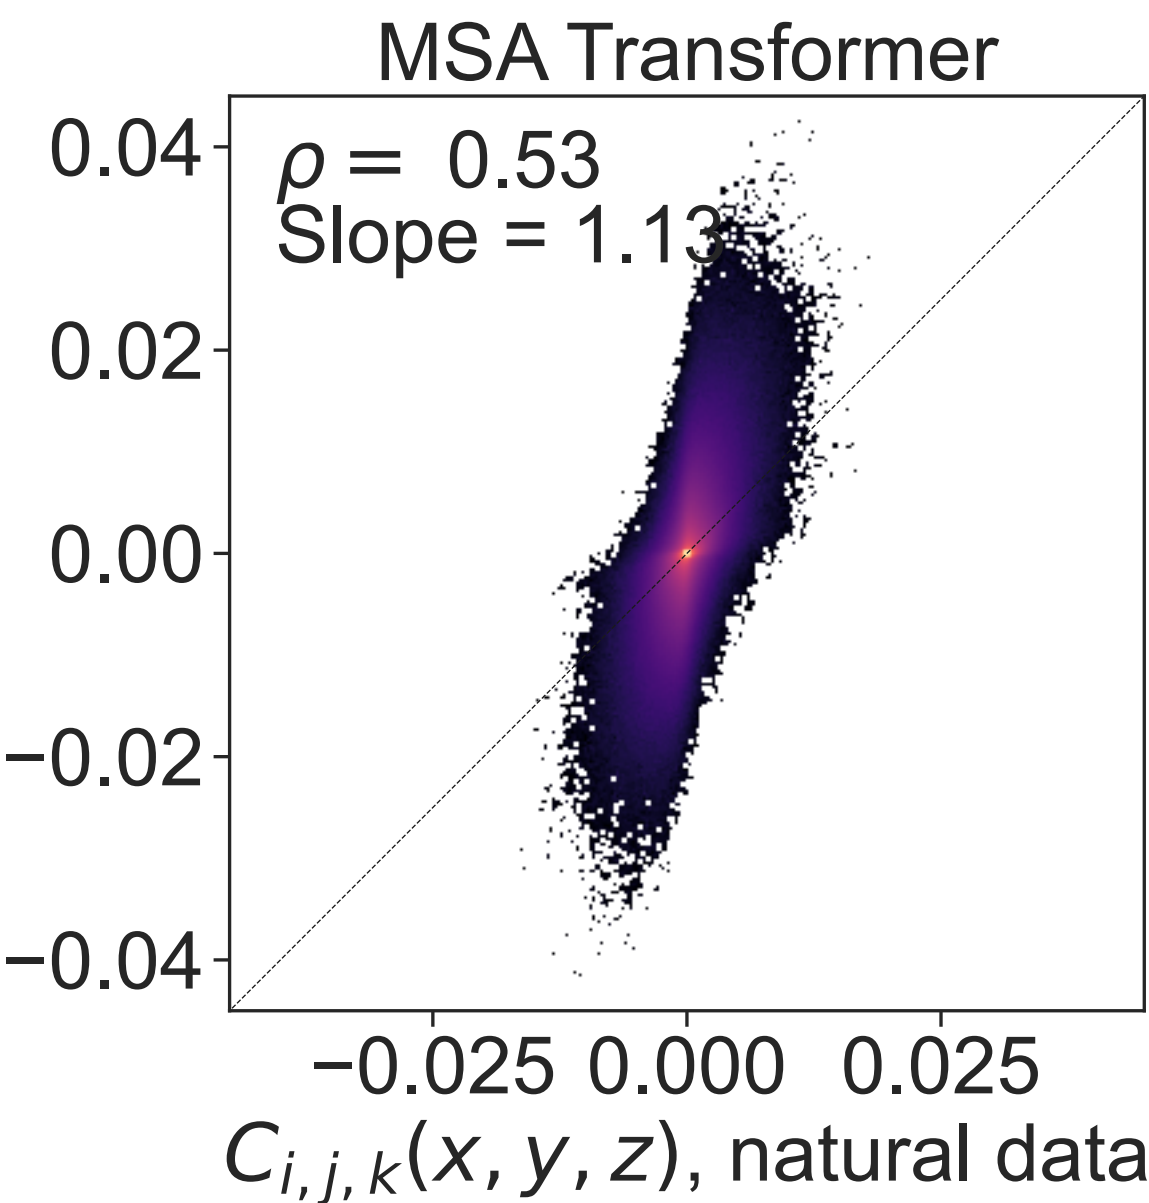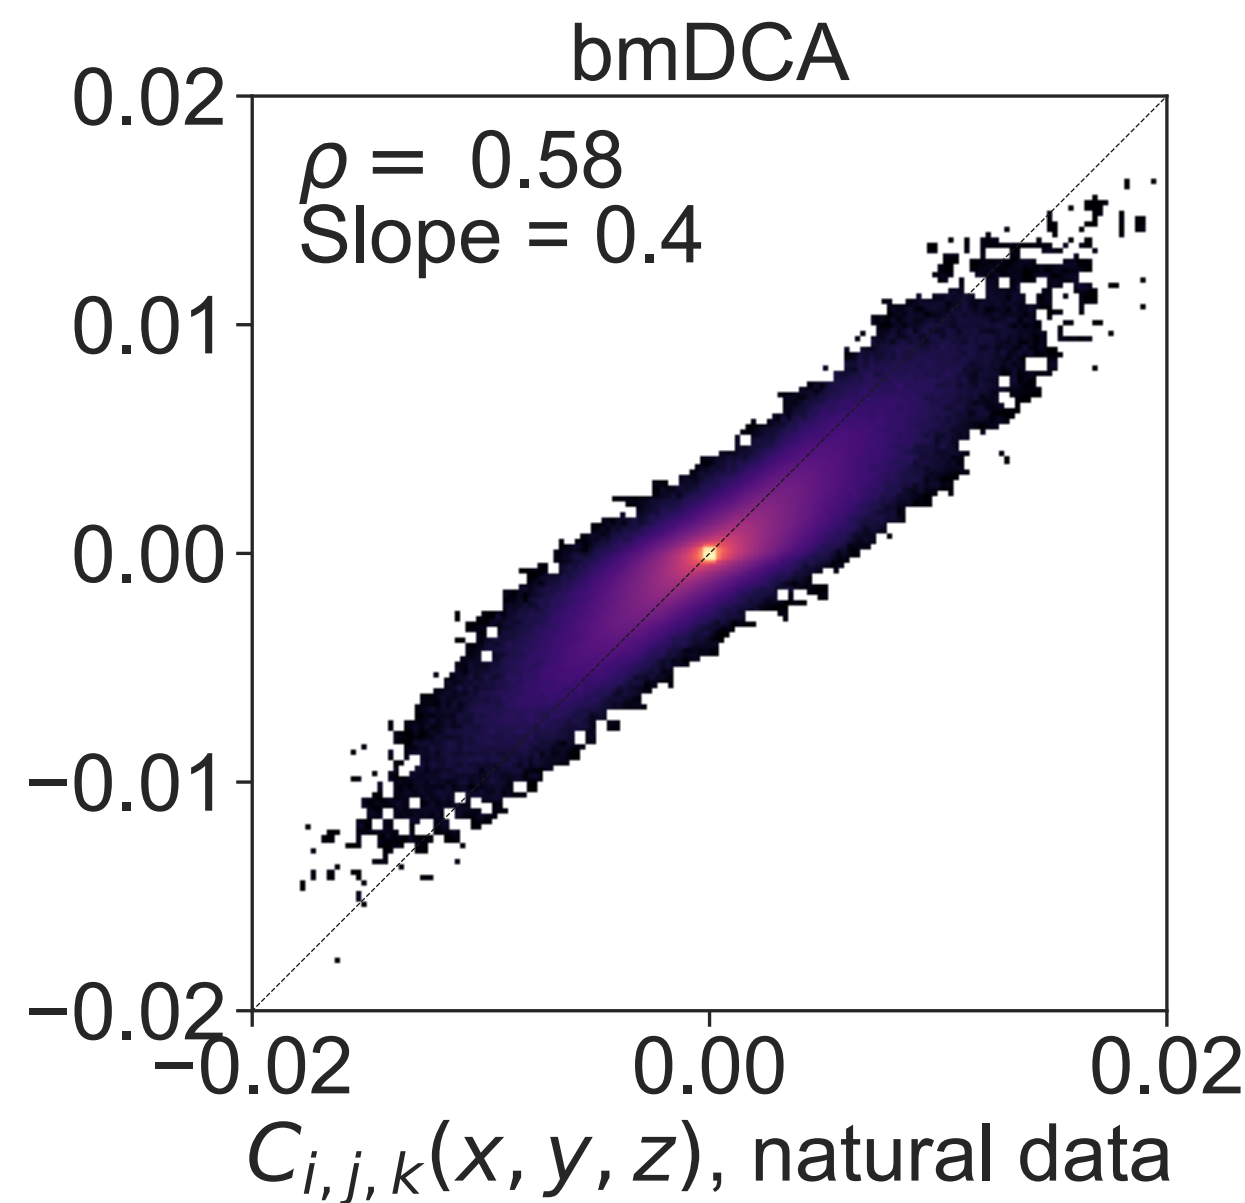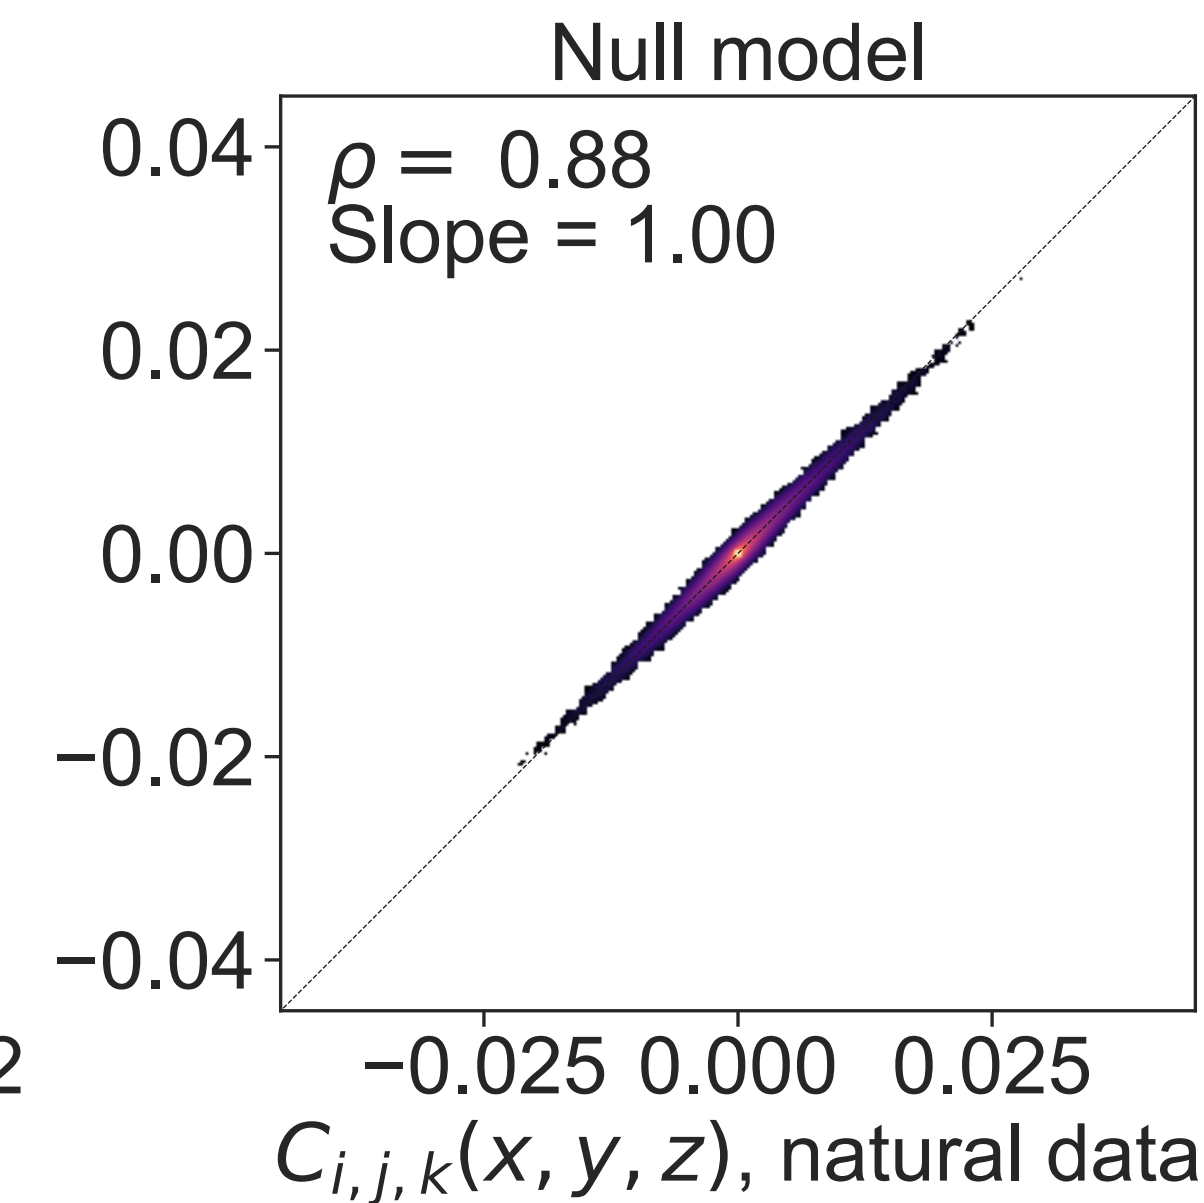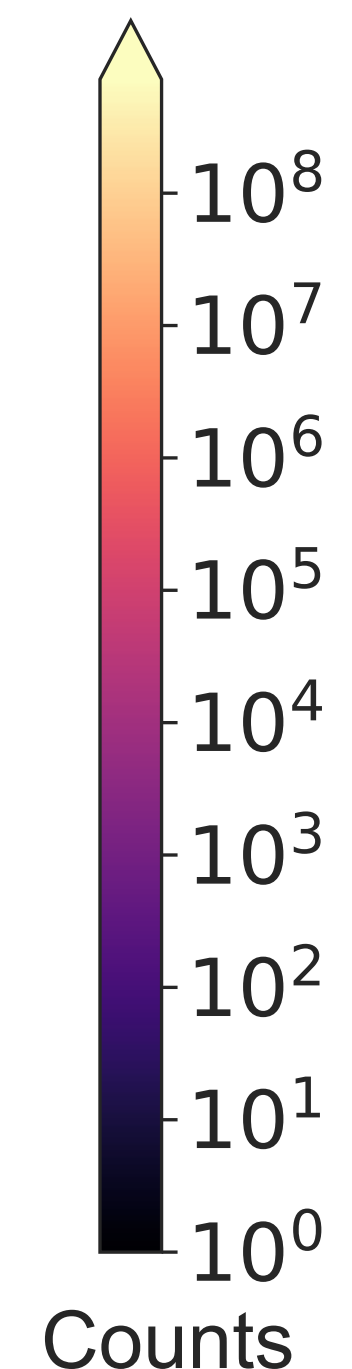

Supplement: supp [file elife-79854-supp-v1.zip]

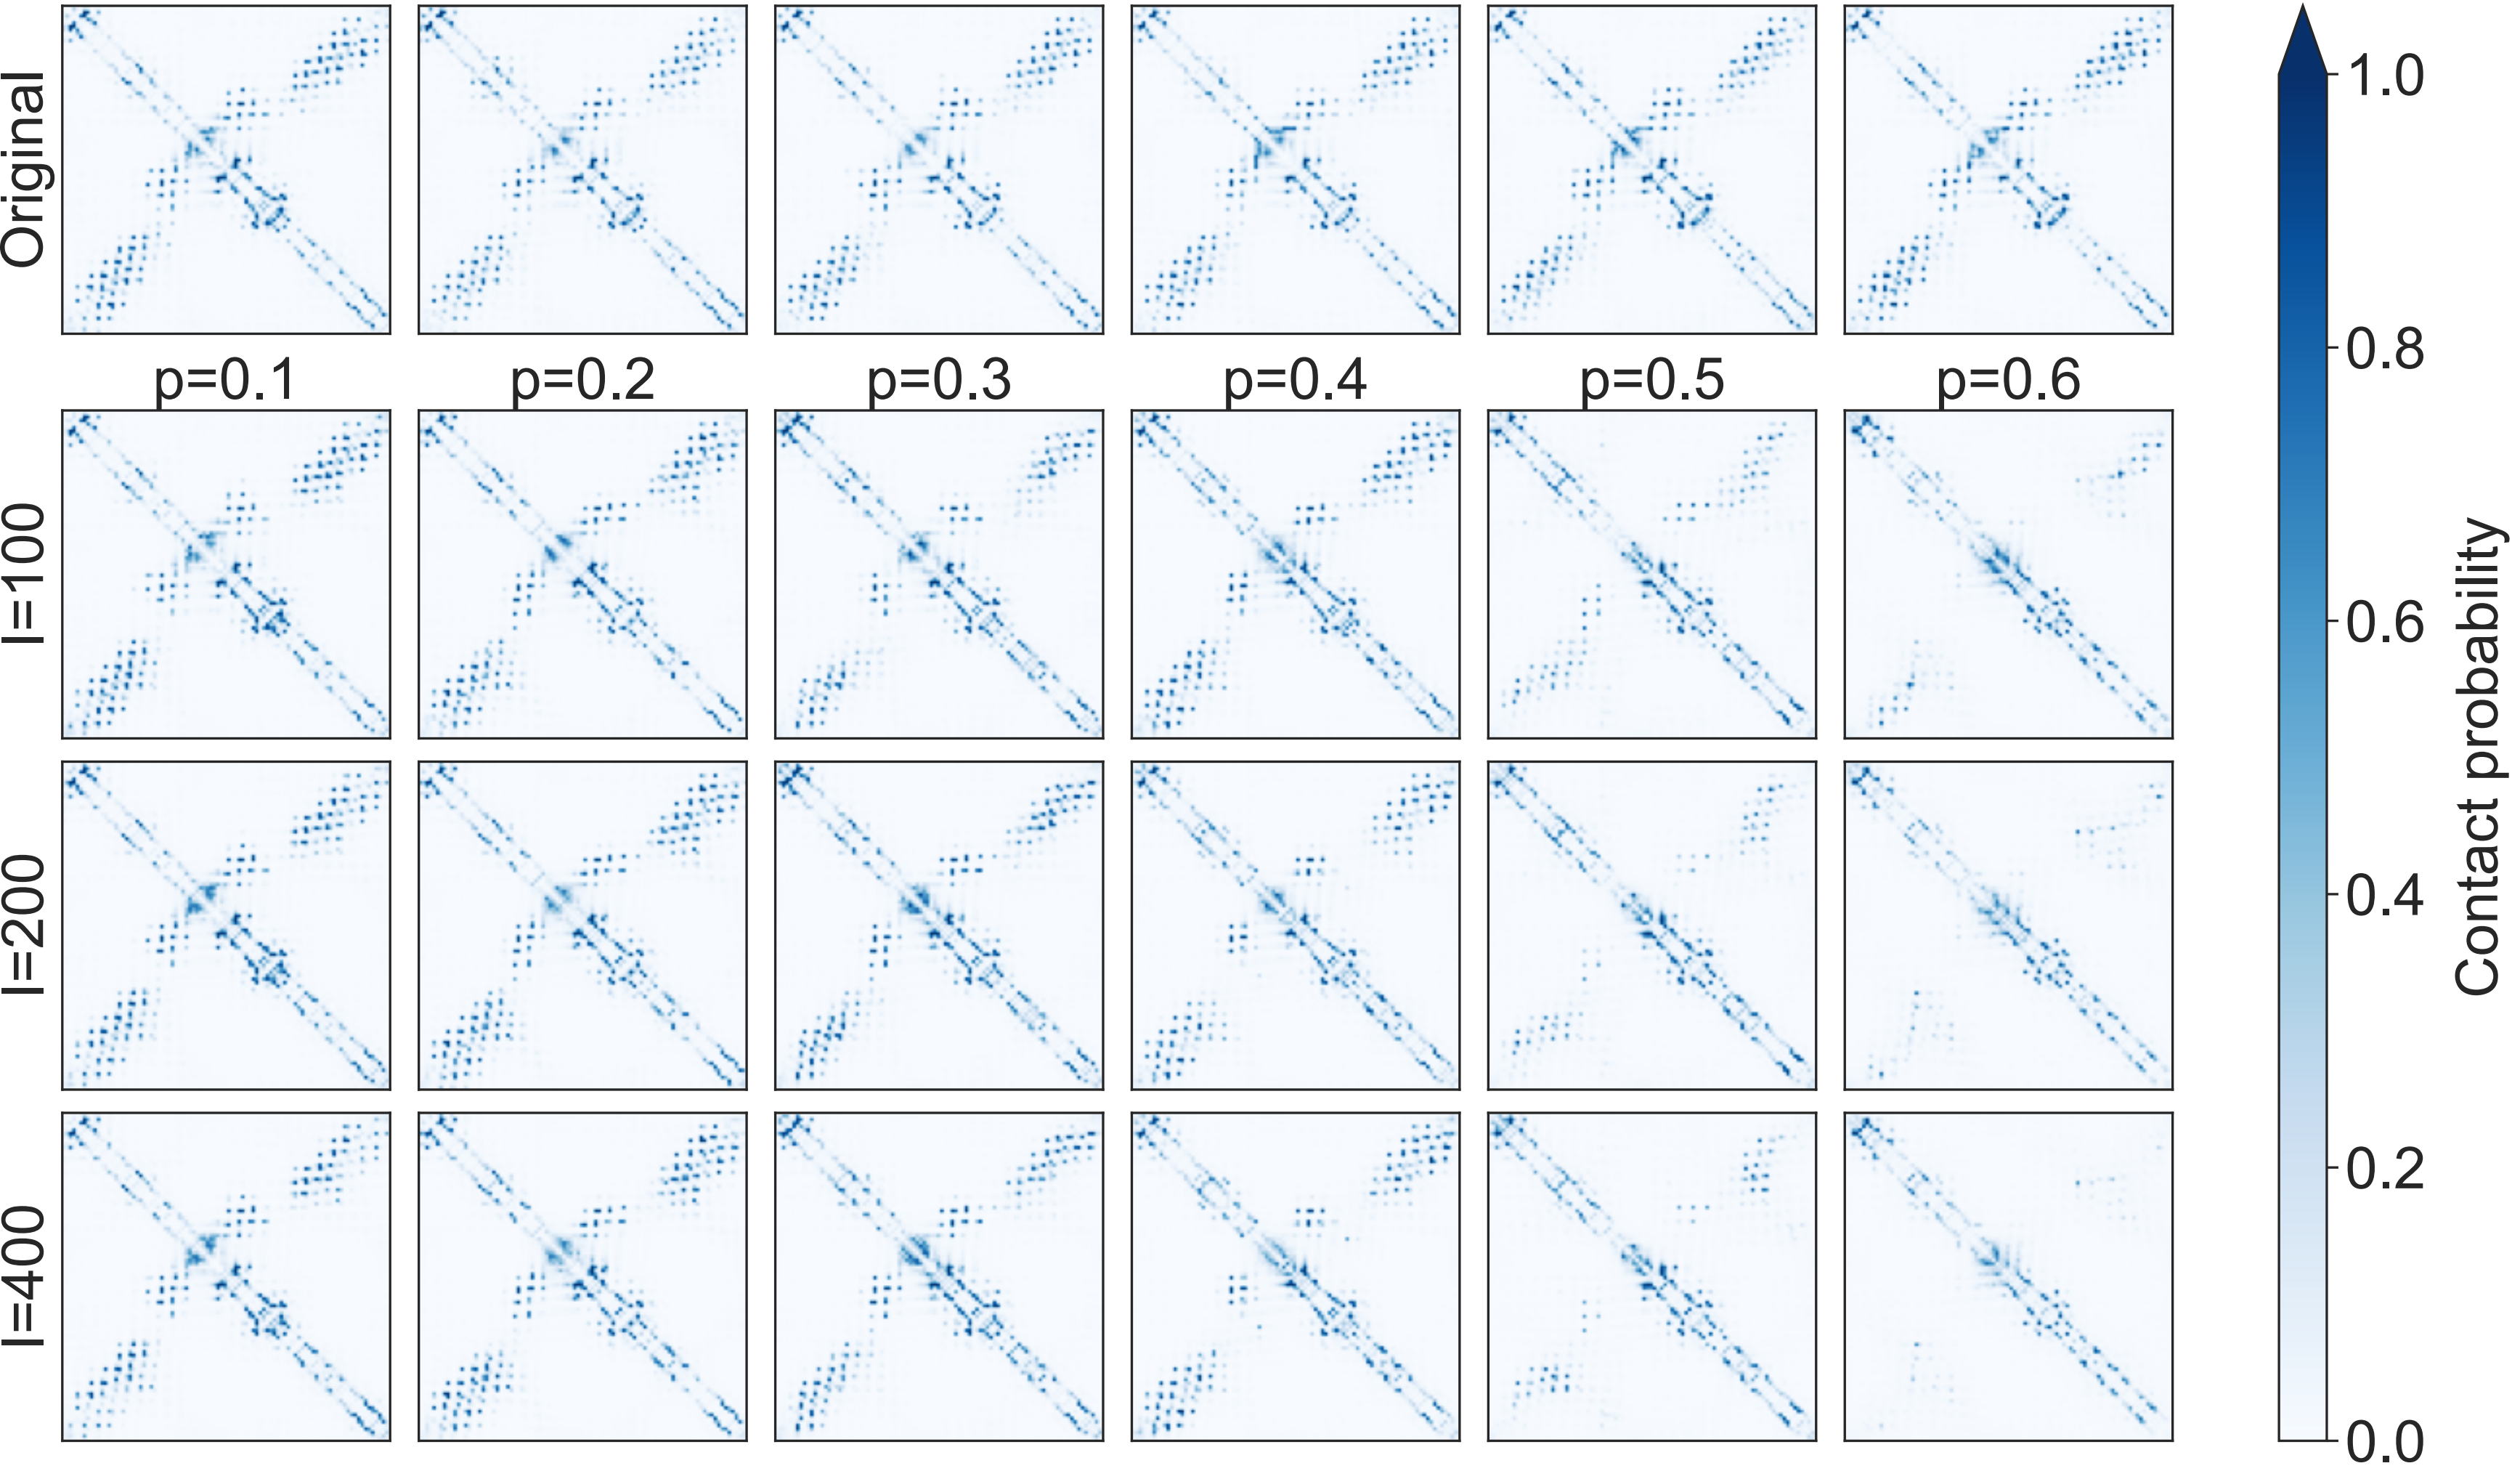

Supplement: supp [file elife-79854-supp-v1.zip]

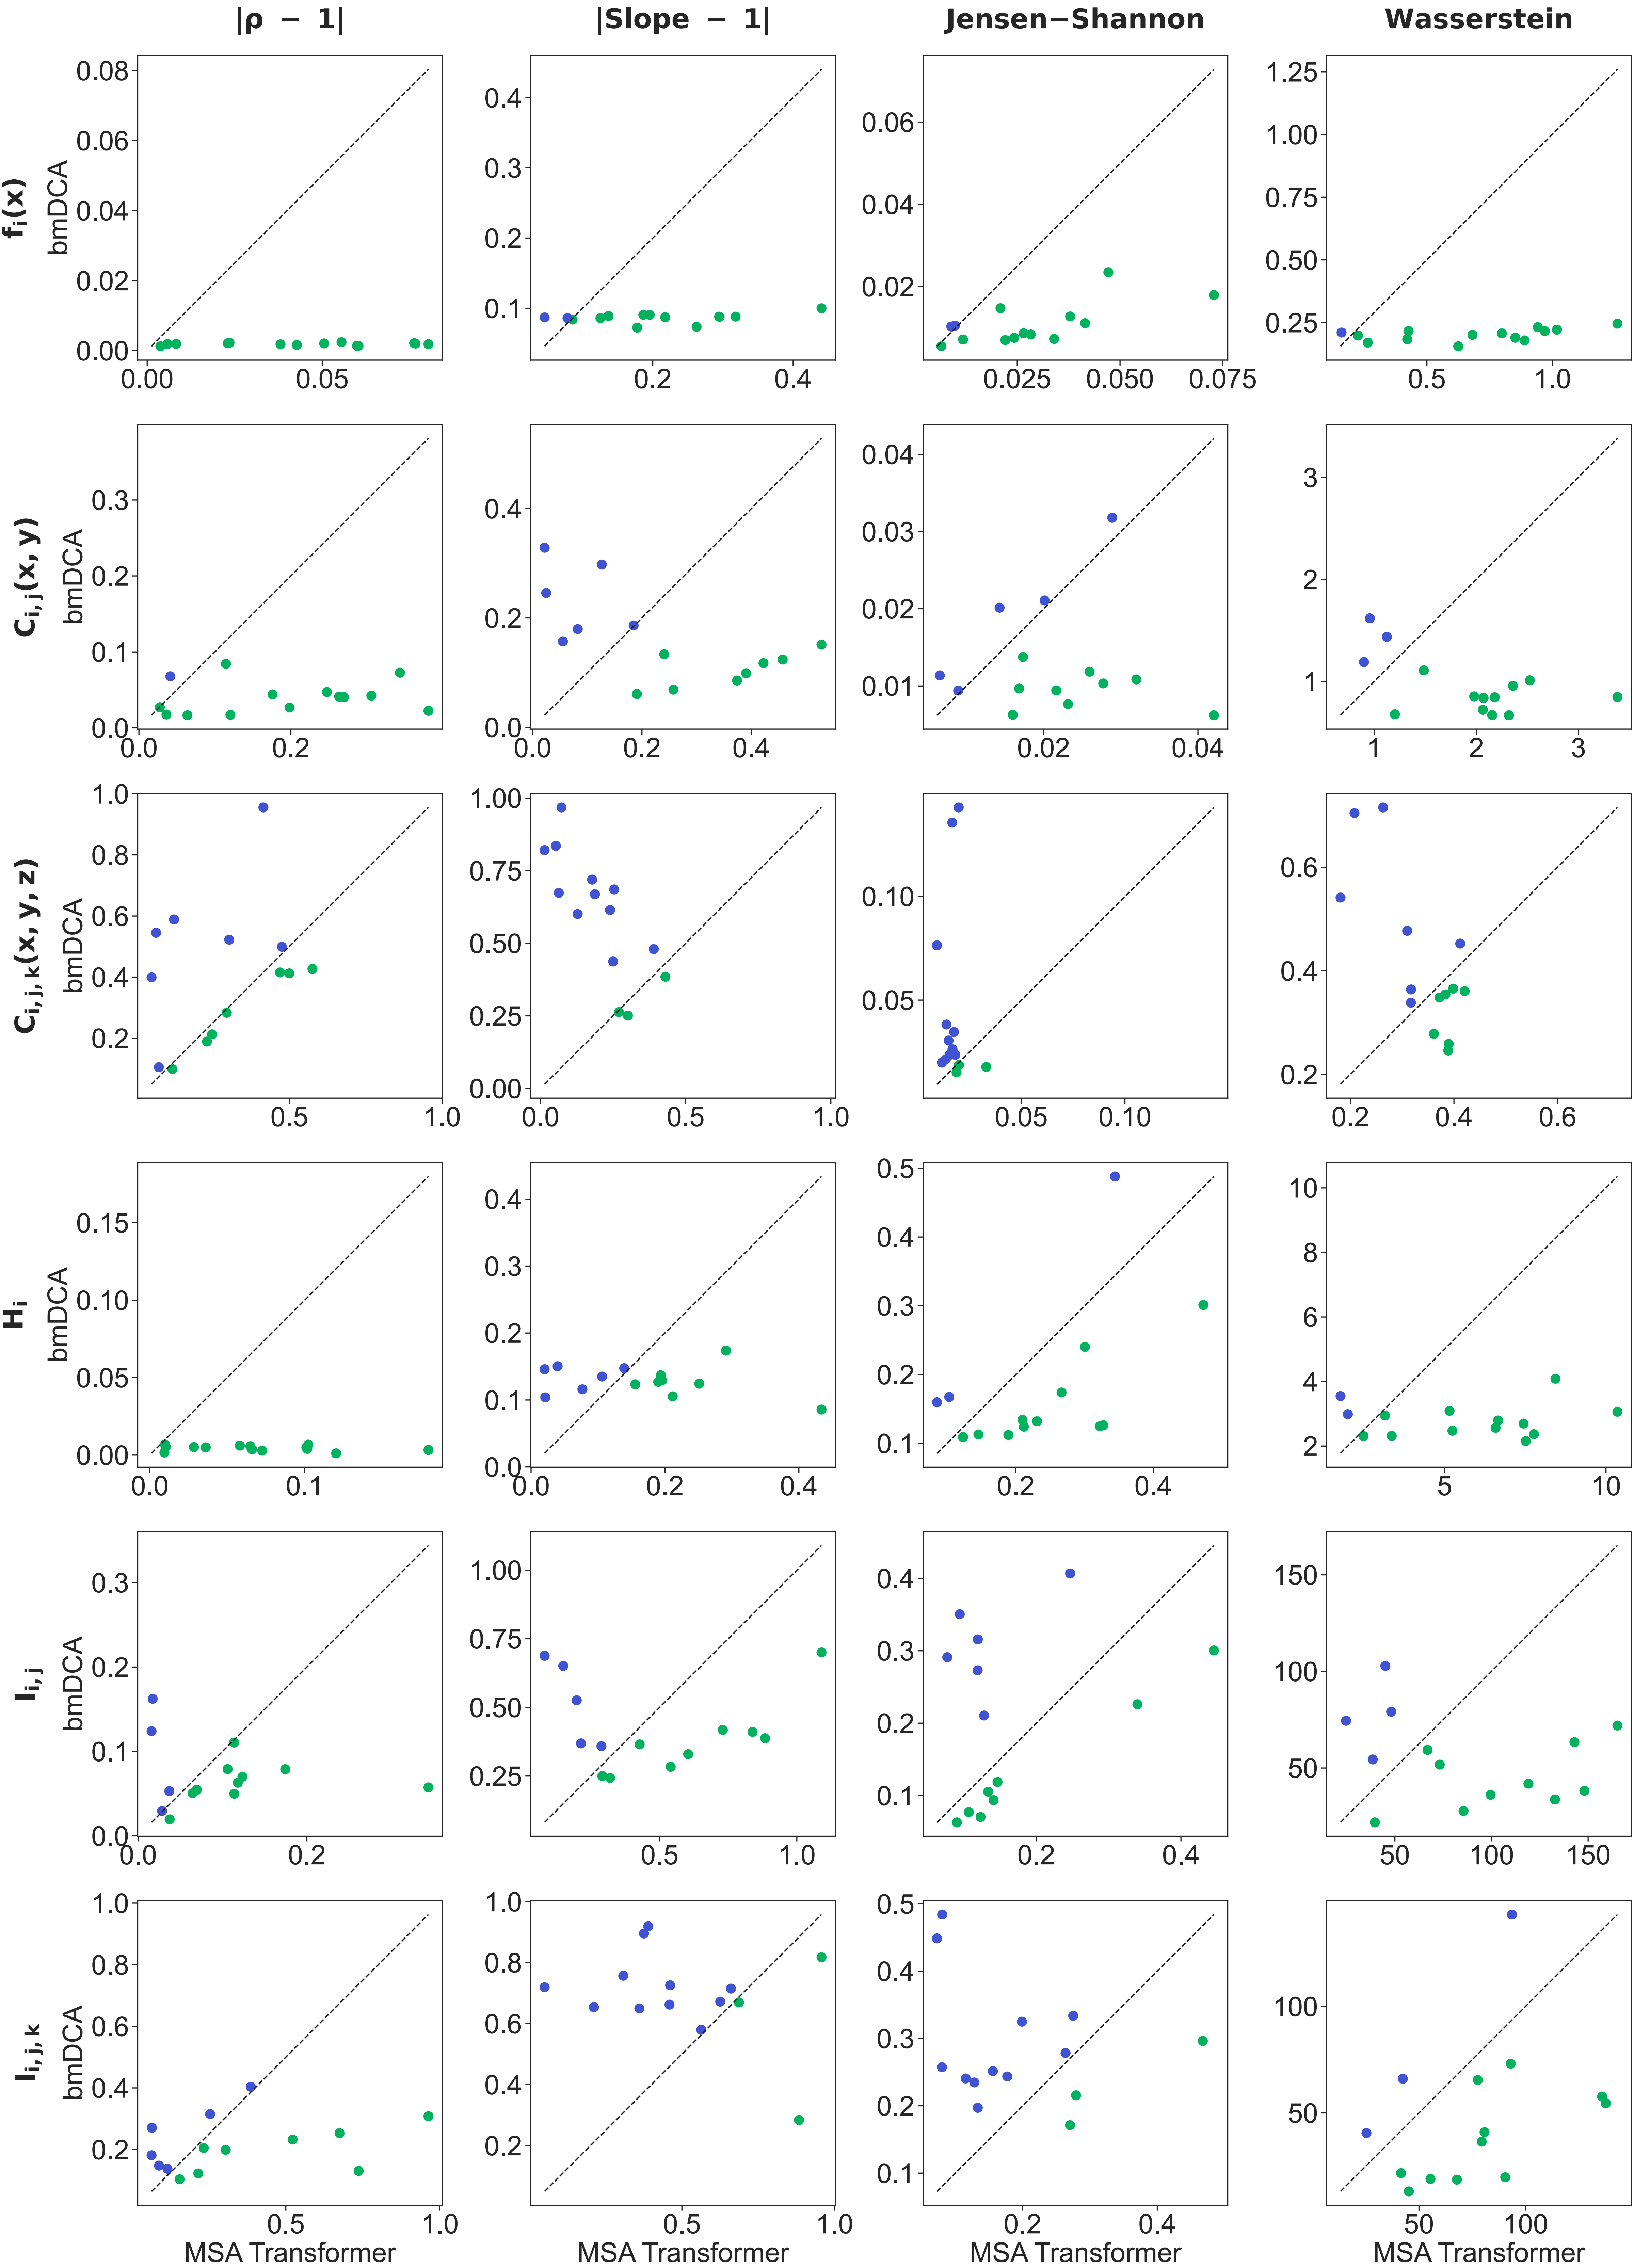

Supplement: supp [file elife-79854-supp-v1.zip]

## Two – body Correlations

$C_{i,j}(x, y)$ , generated data

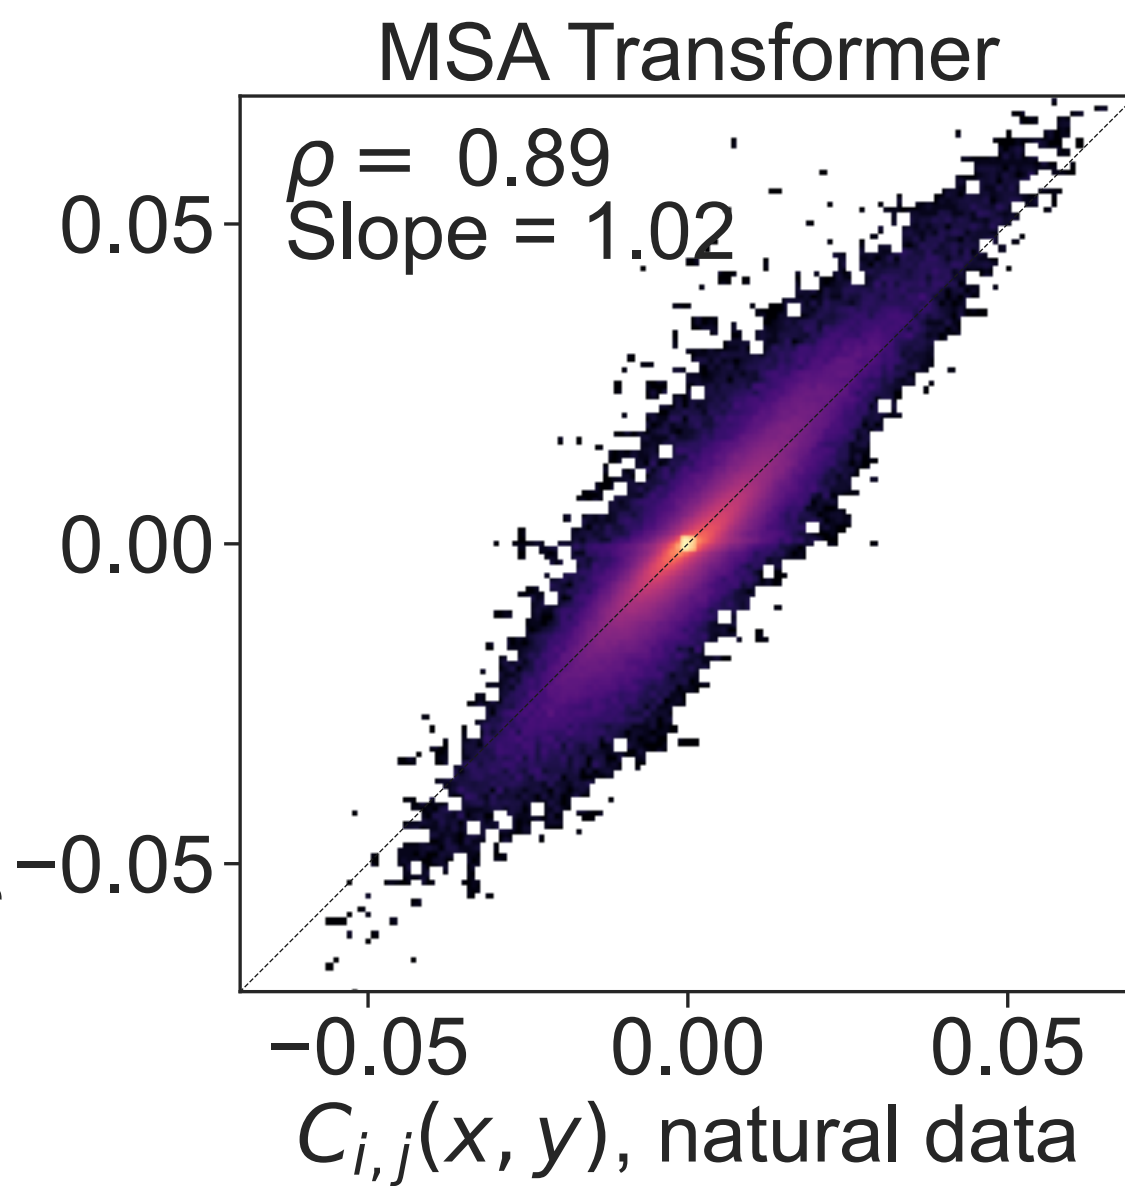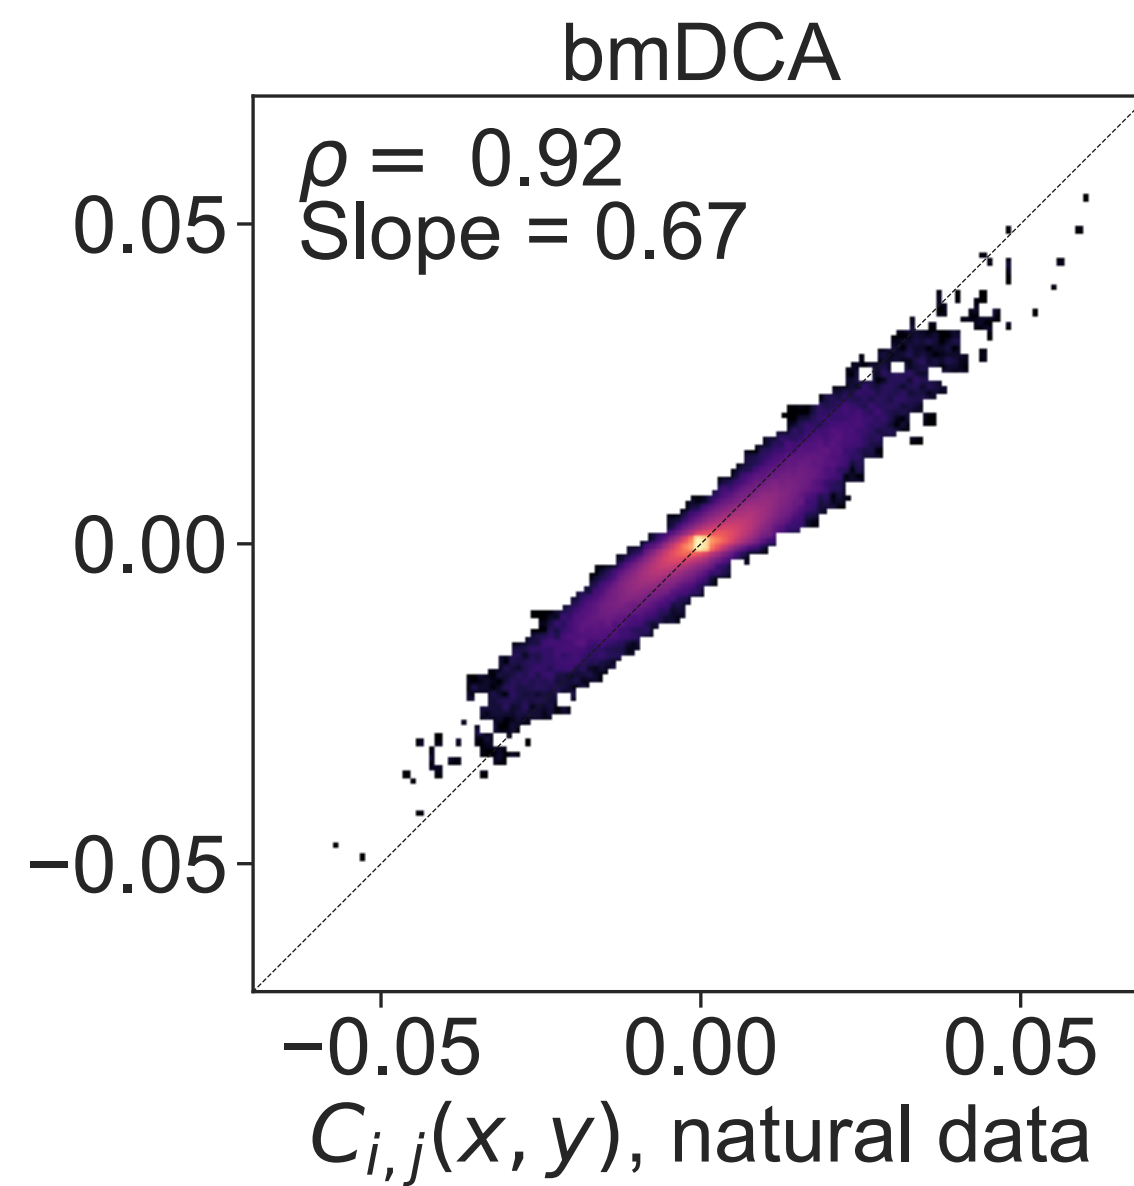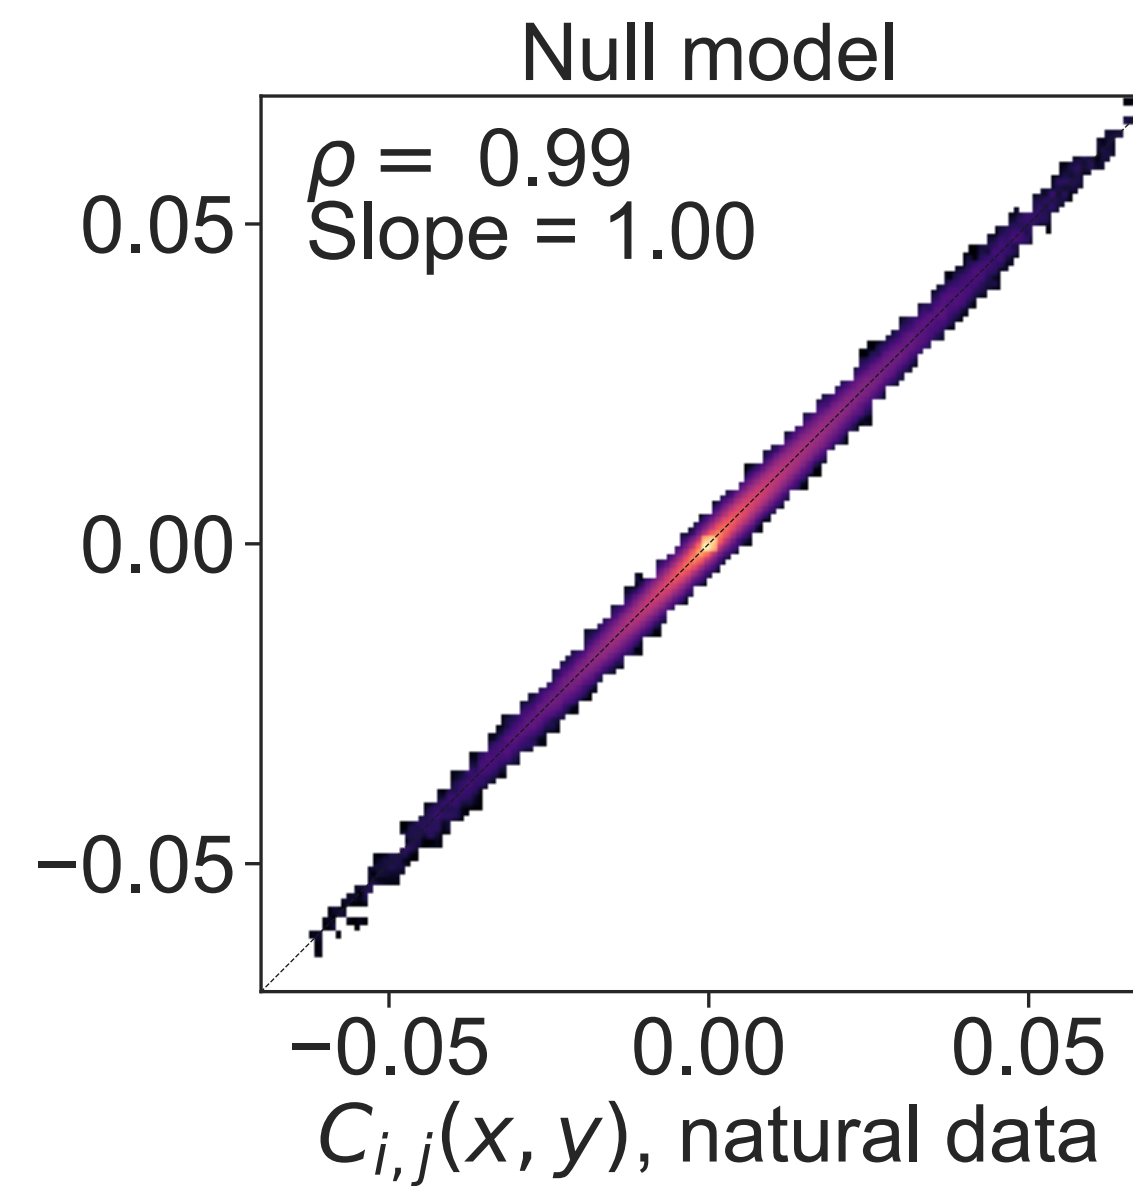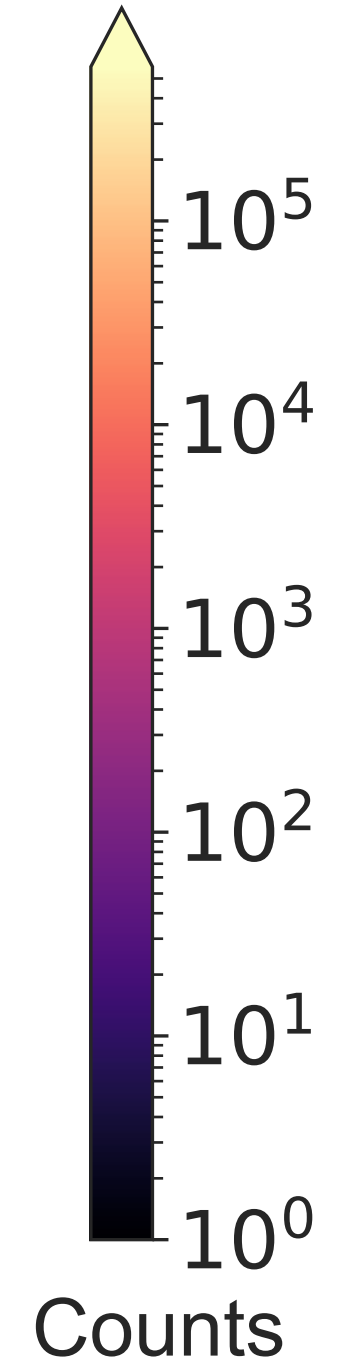

## Three – body Correlations

$C_{i,j,k}(x, y, z)$ , generated data

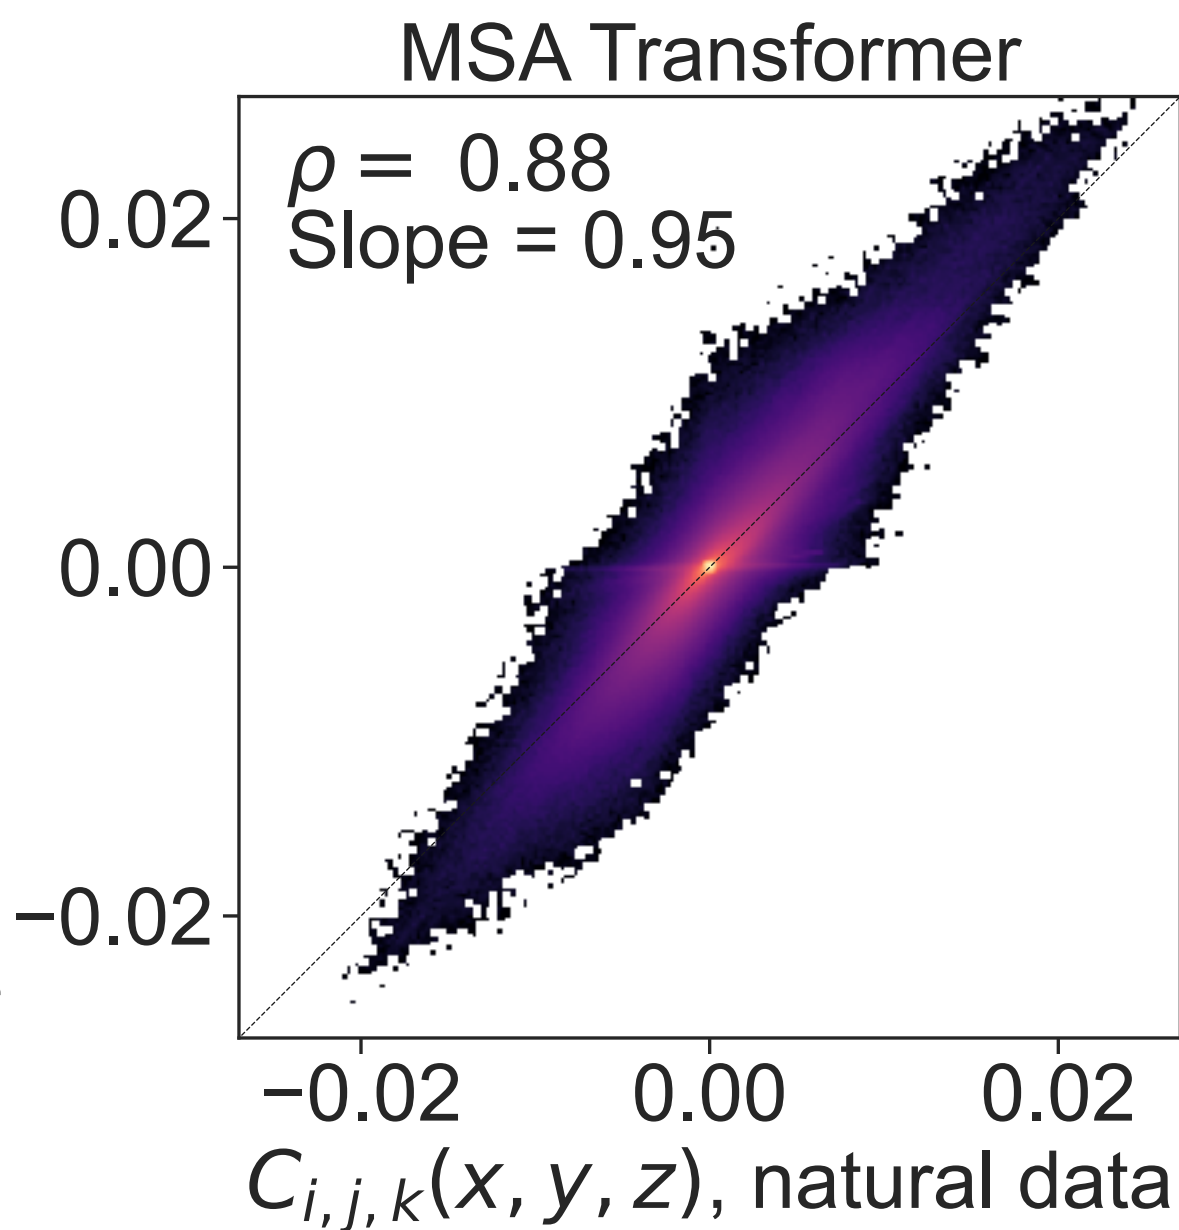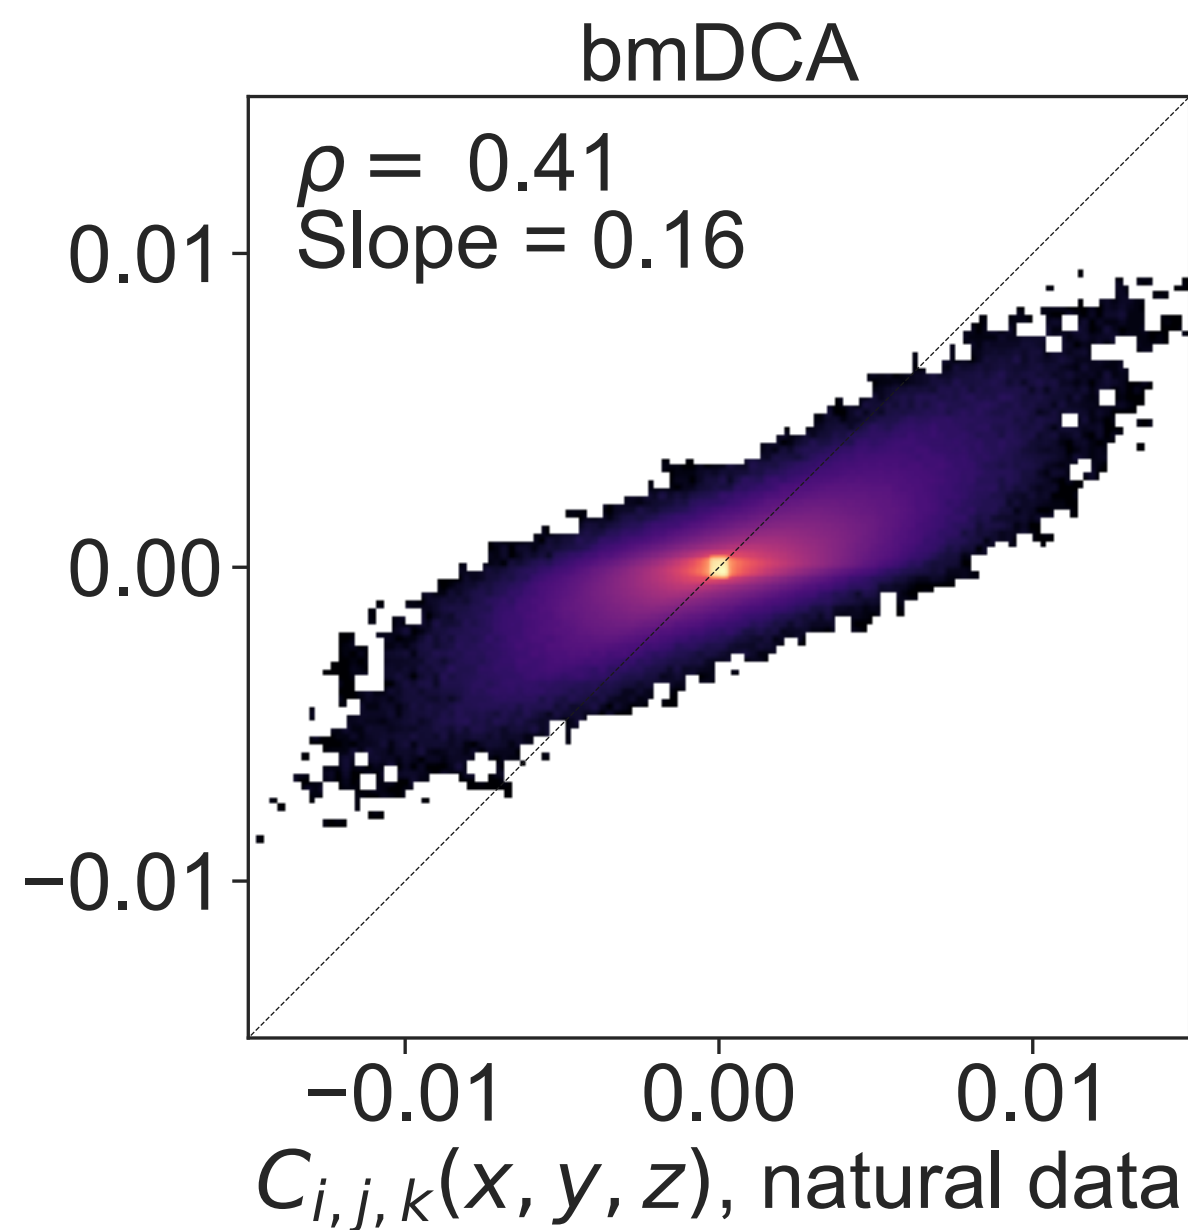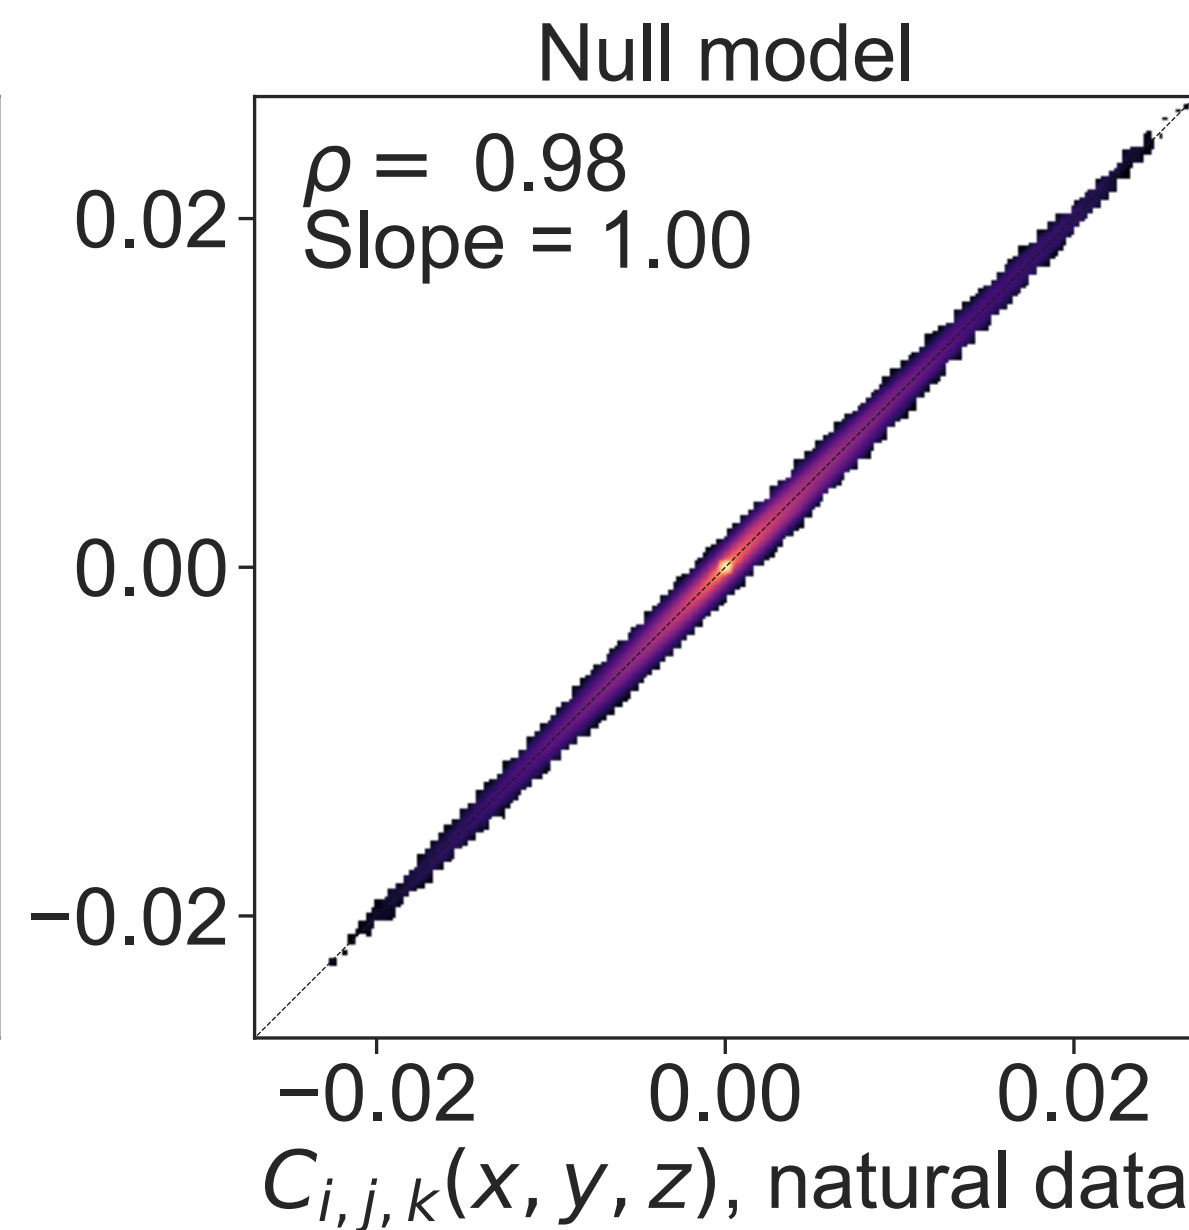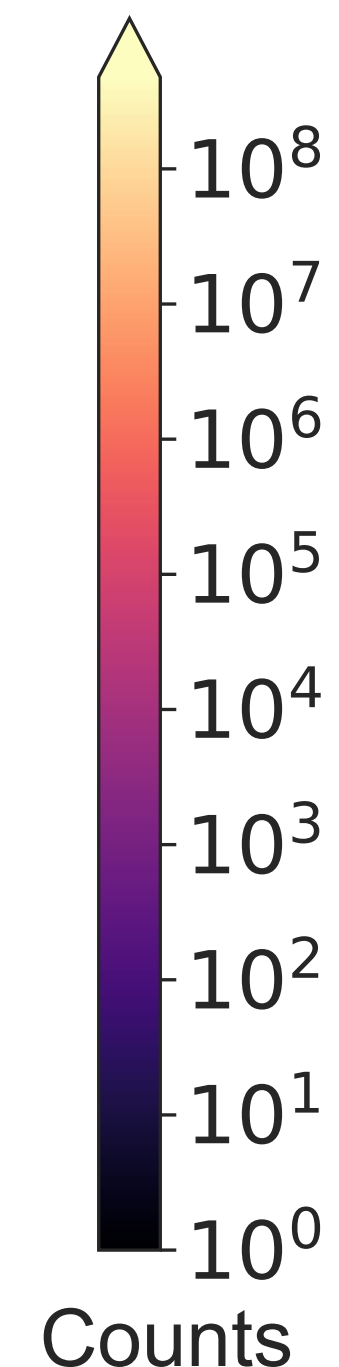

Supplement: supp [file elife-79854-supp-v1.zip]

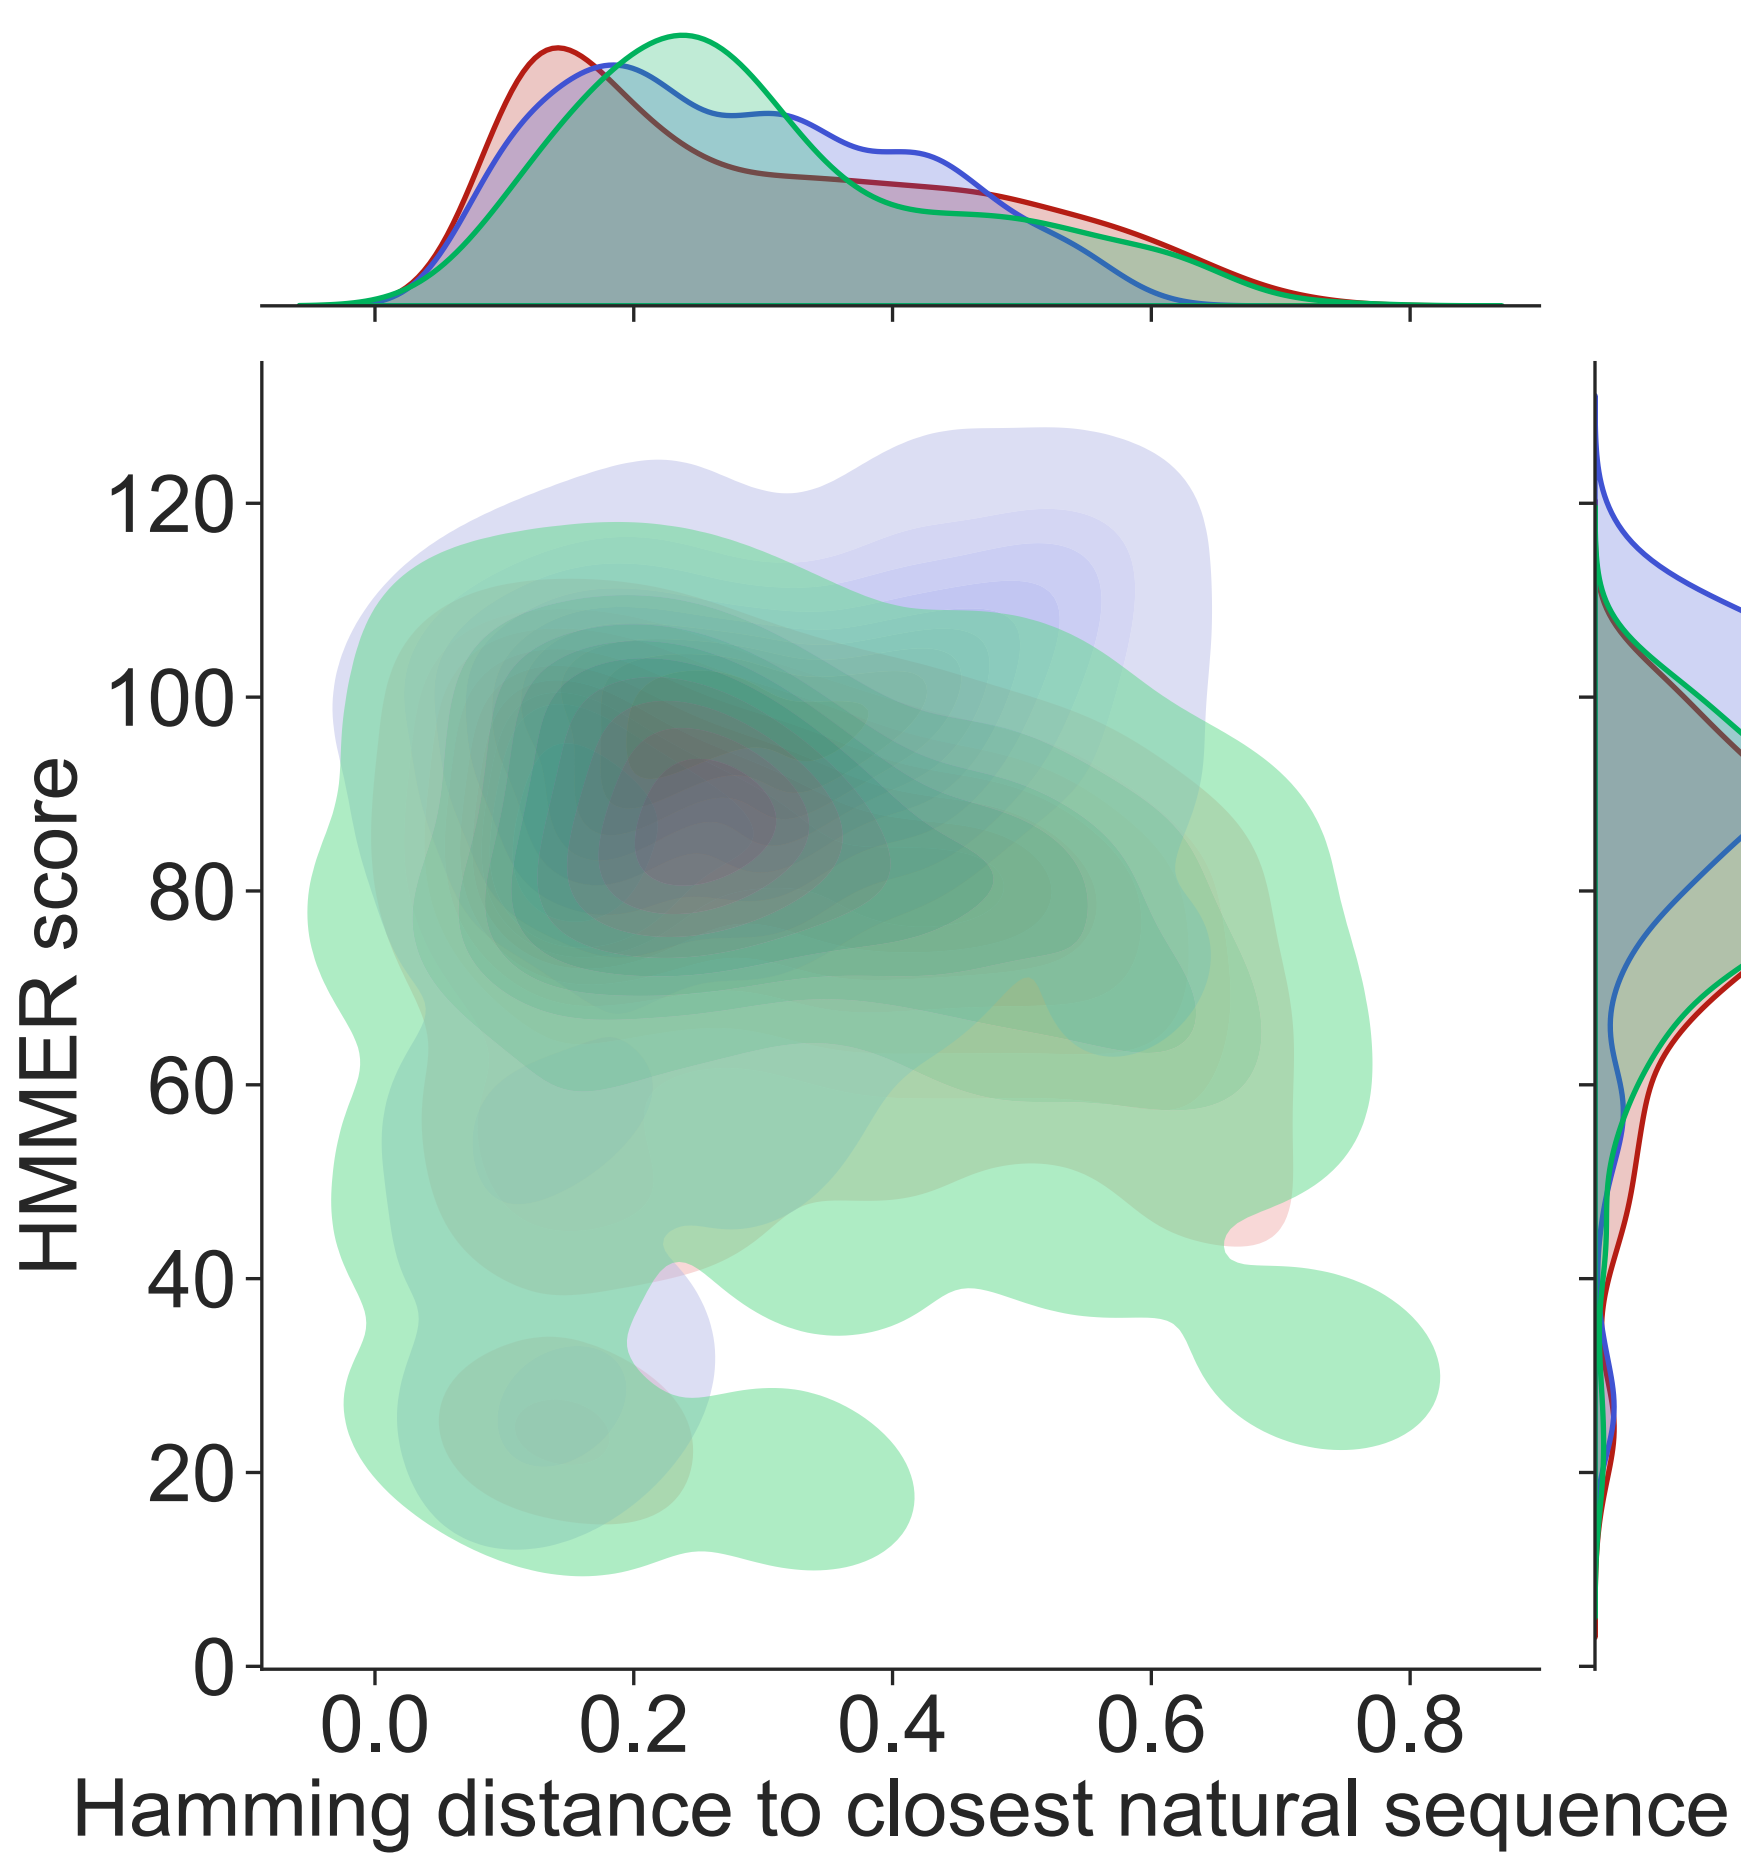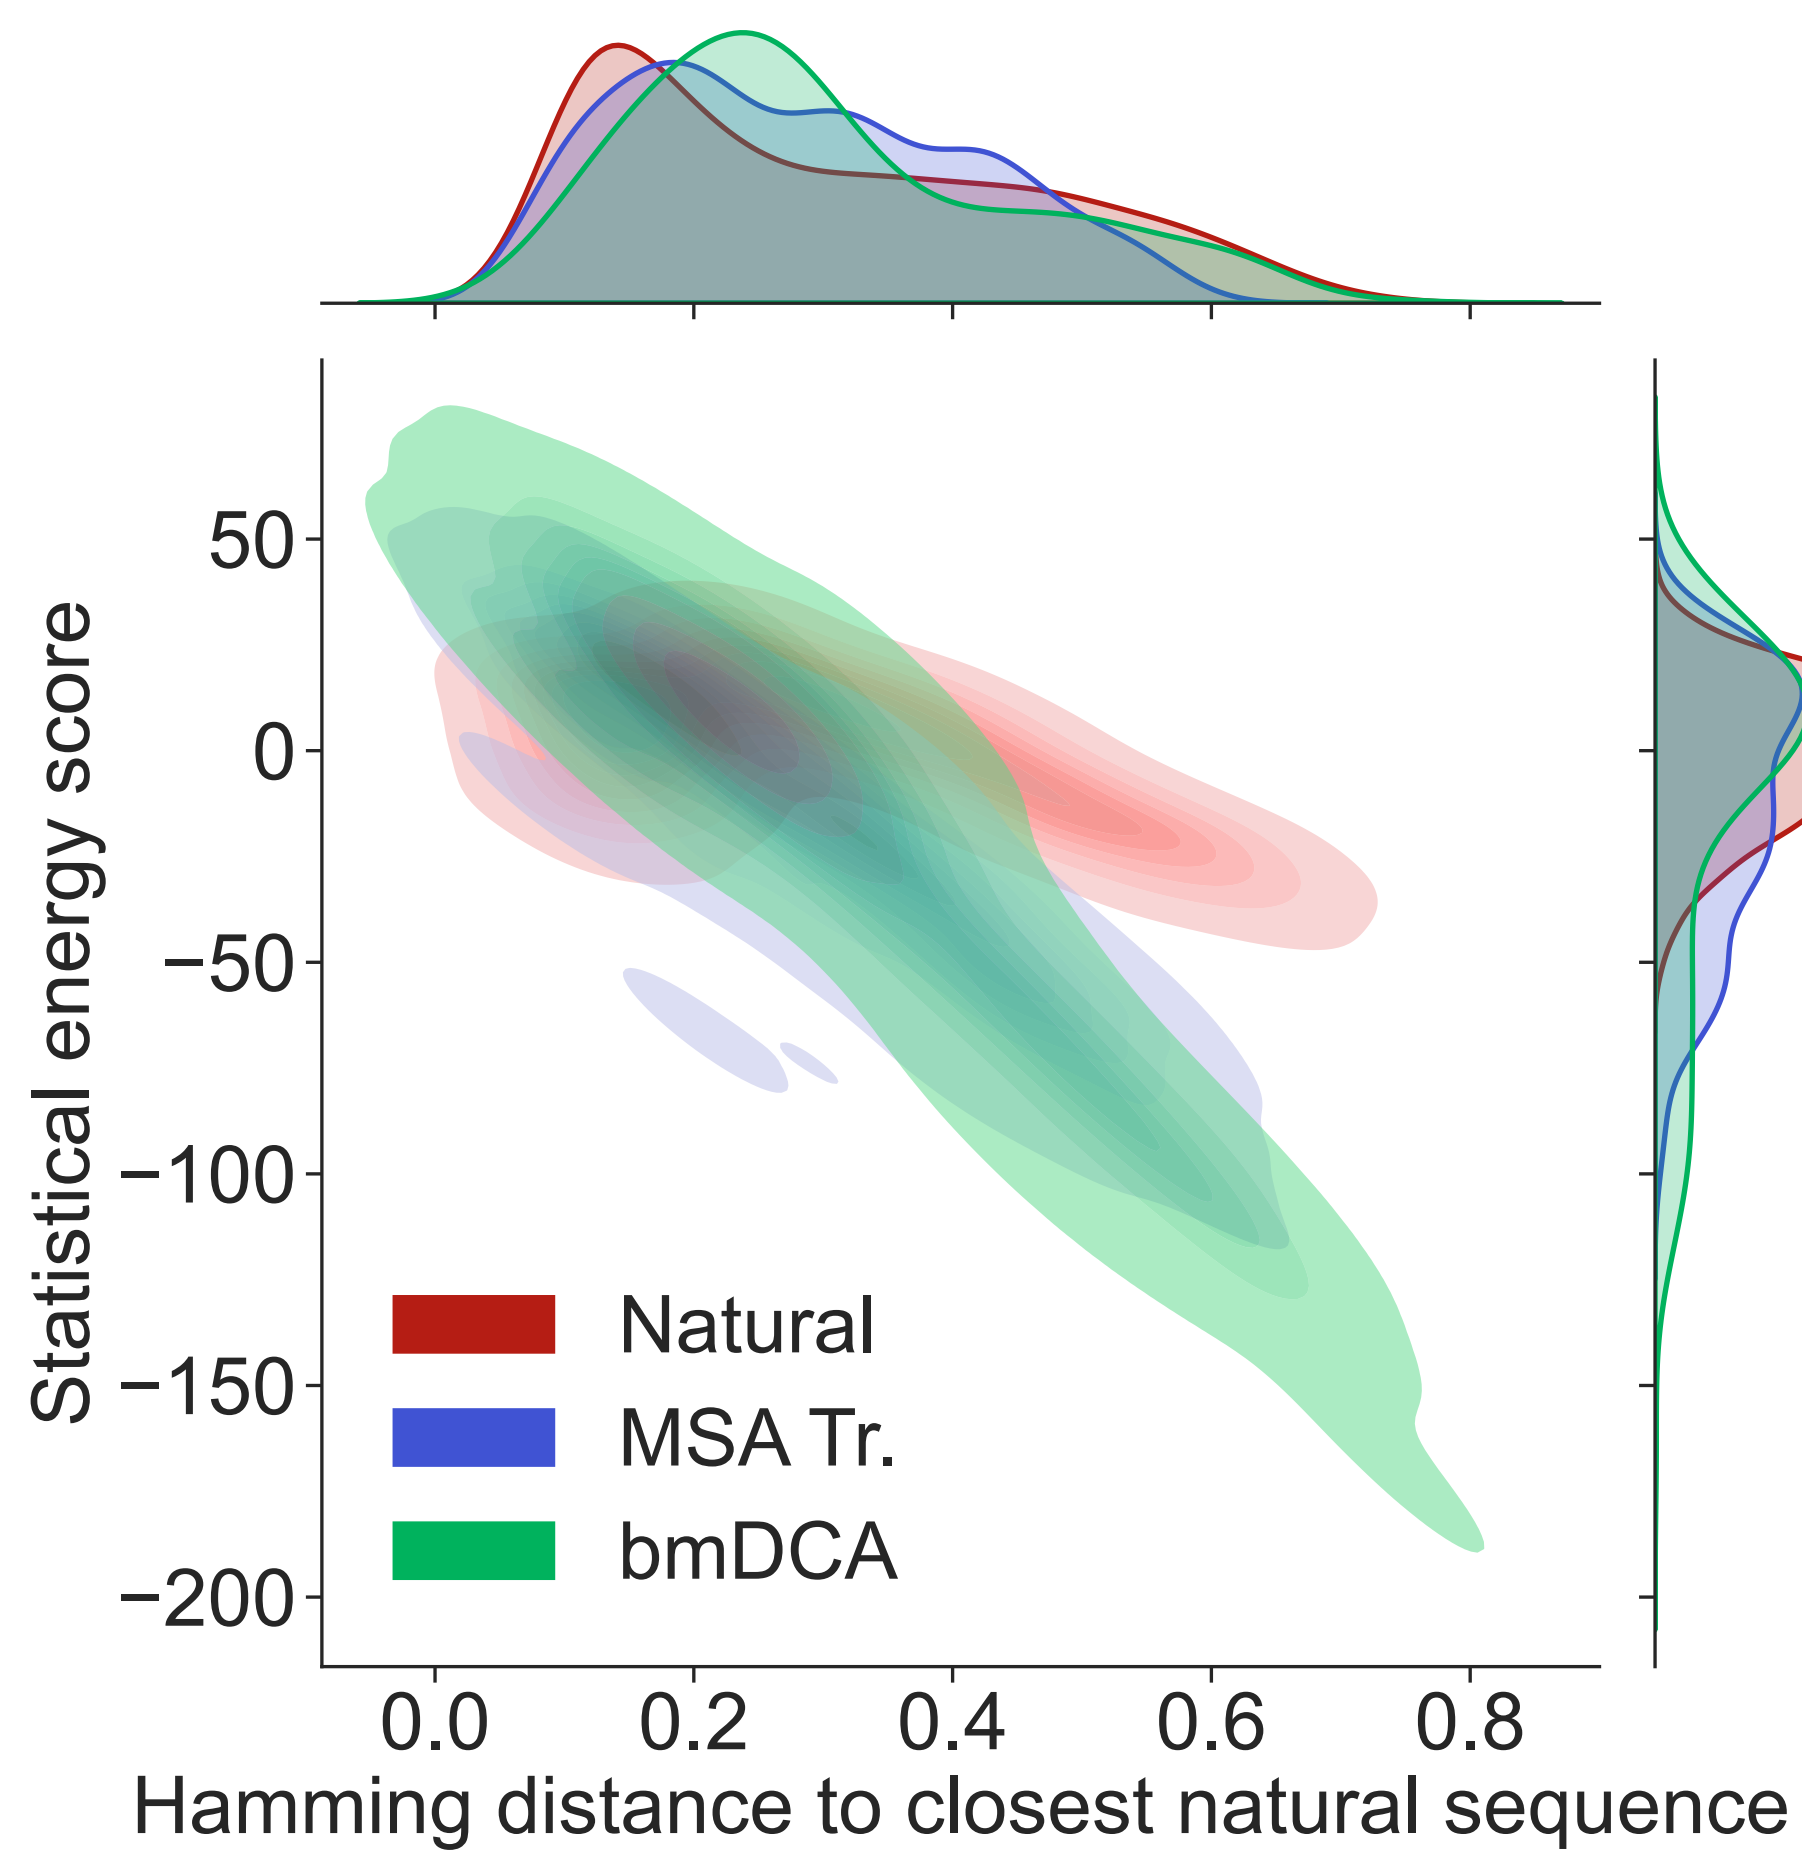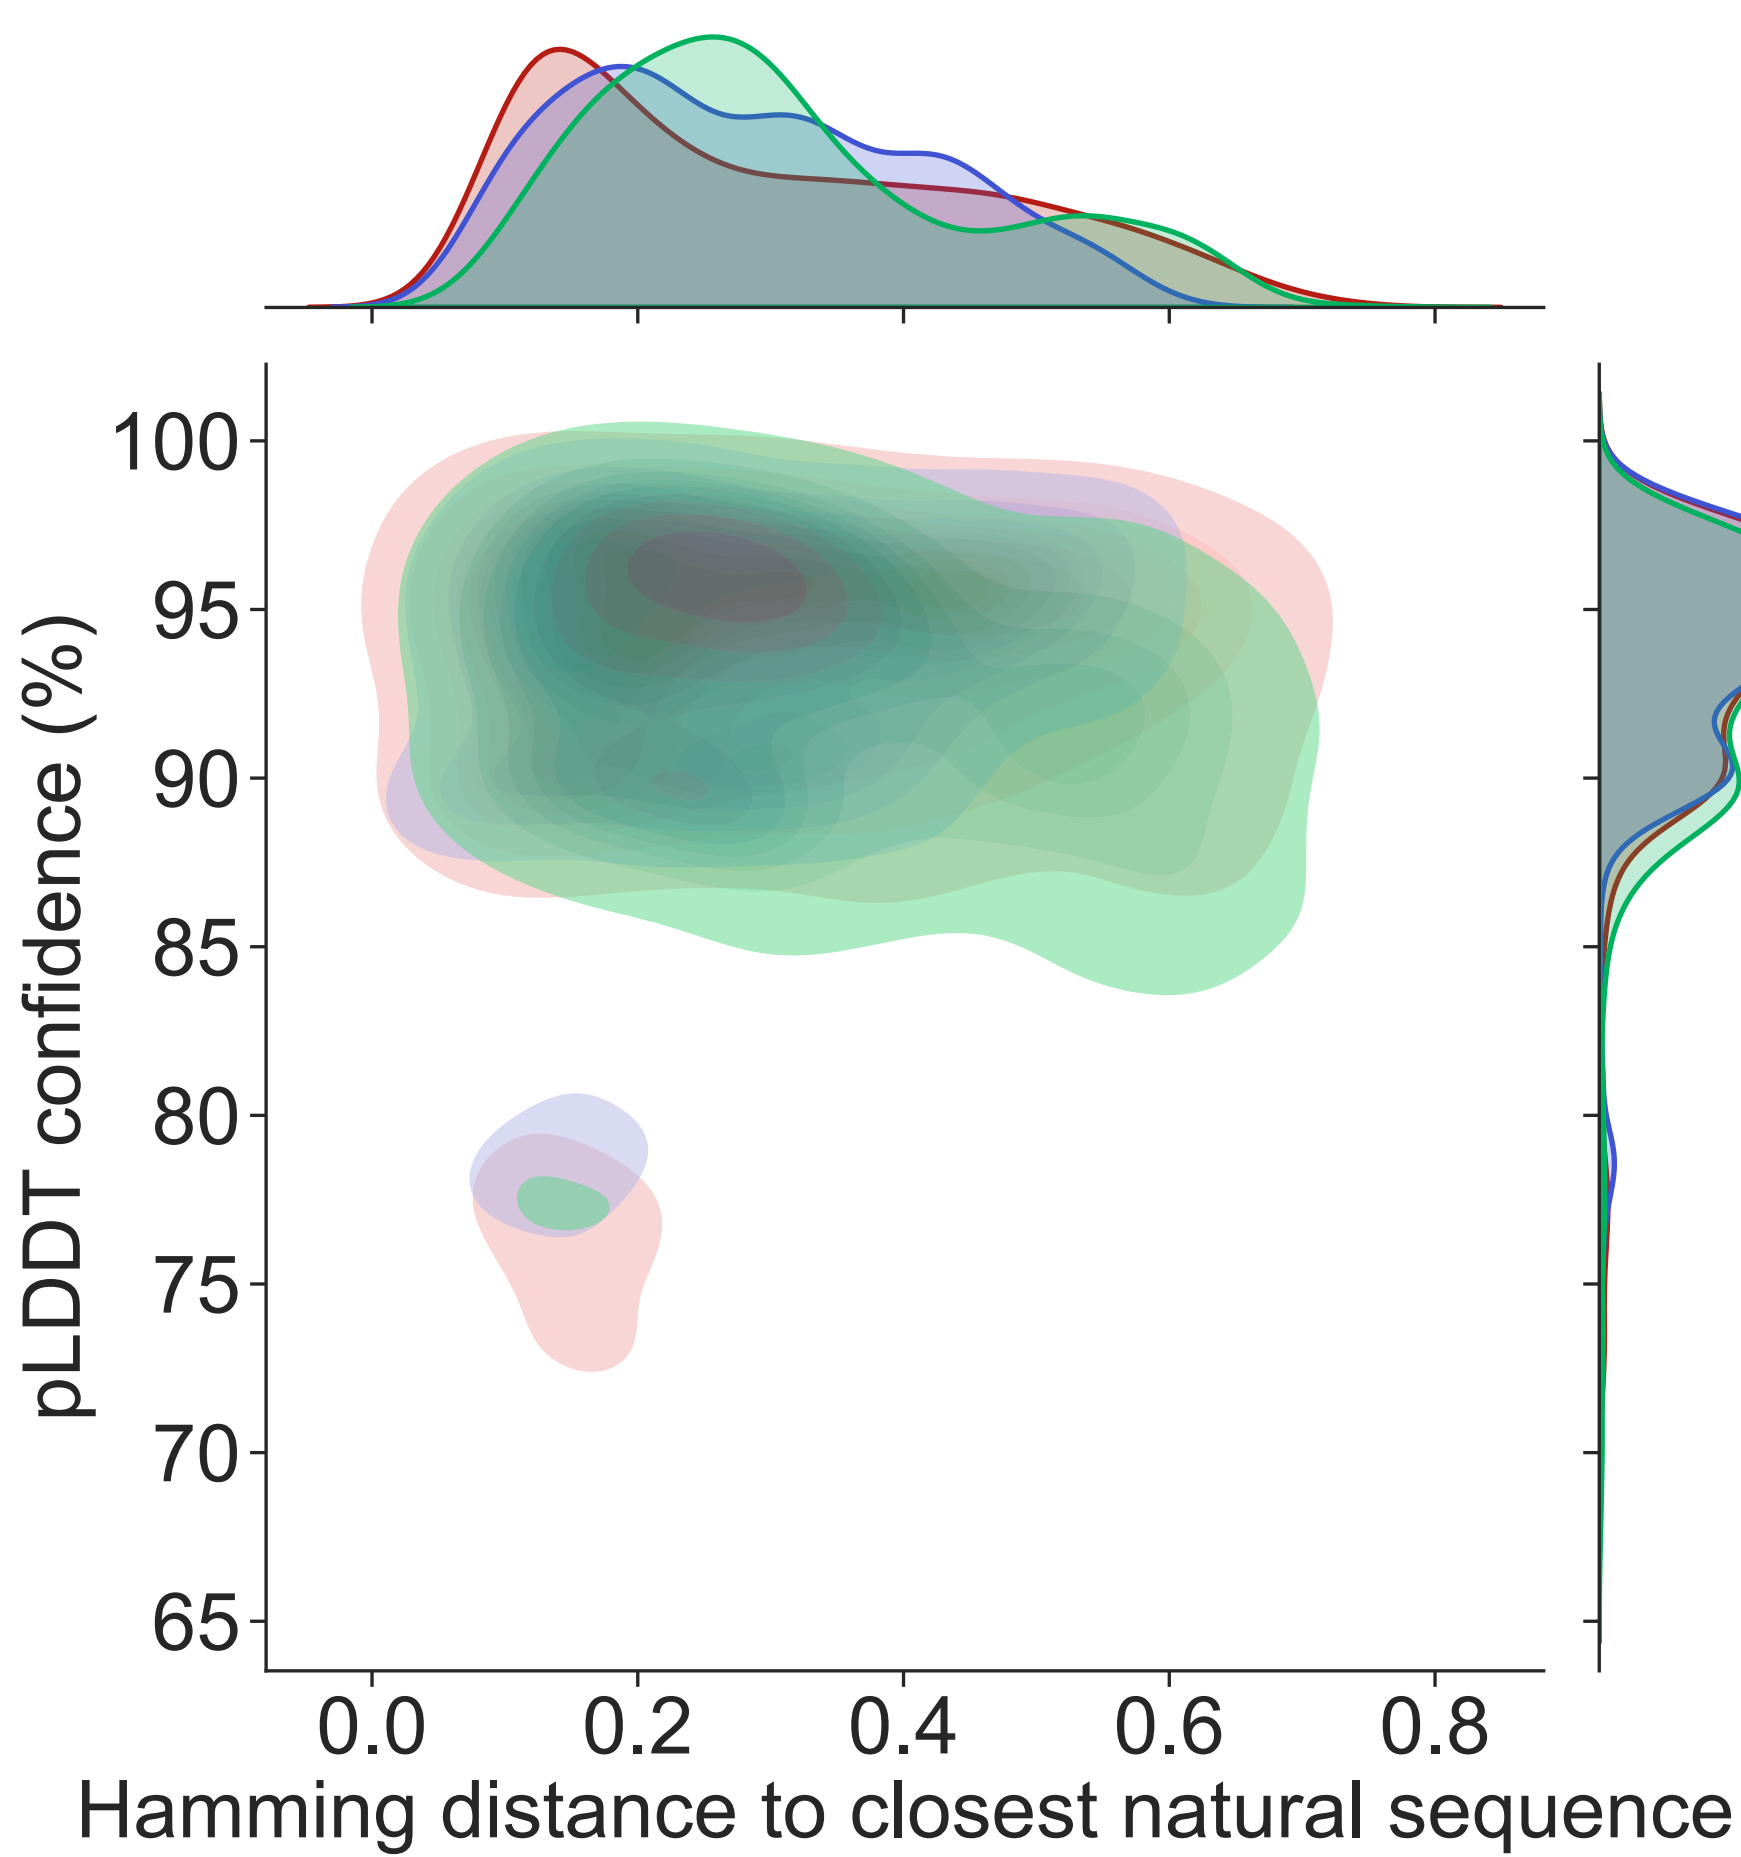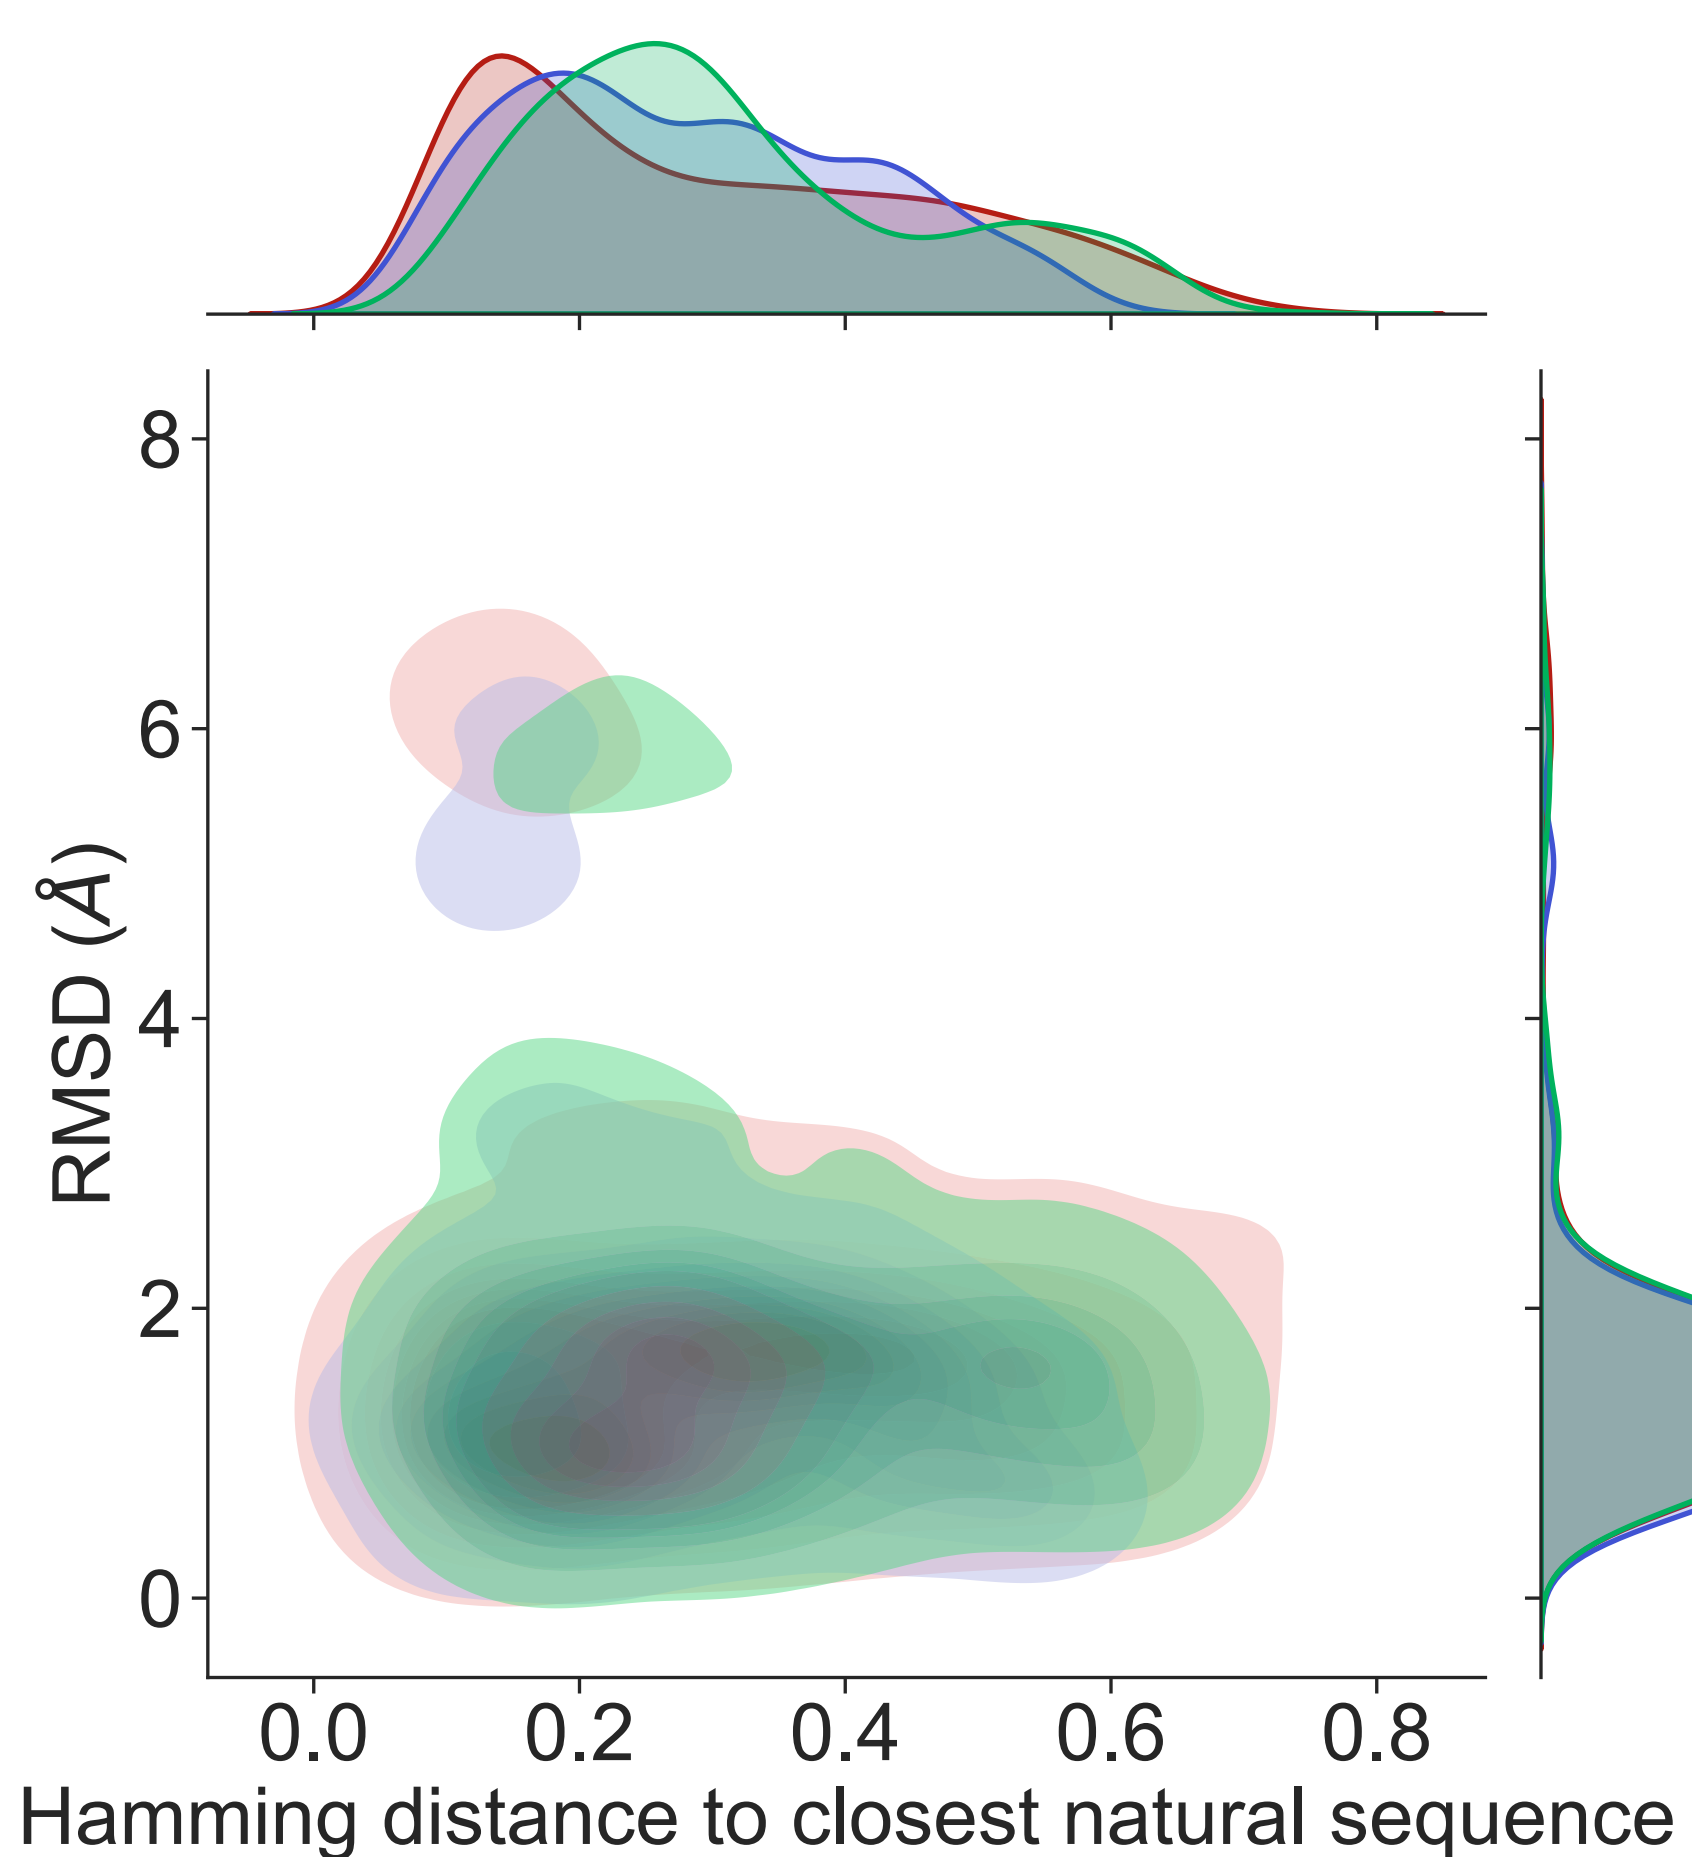

Supplement: supp [file elife-79854-supp-v1.zip]

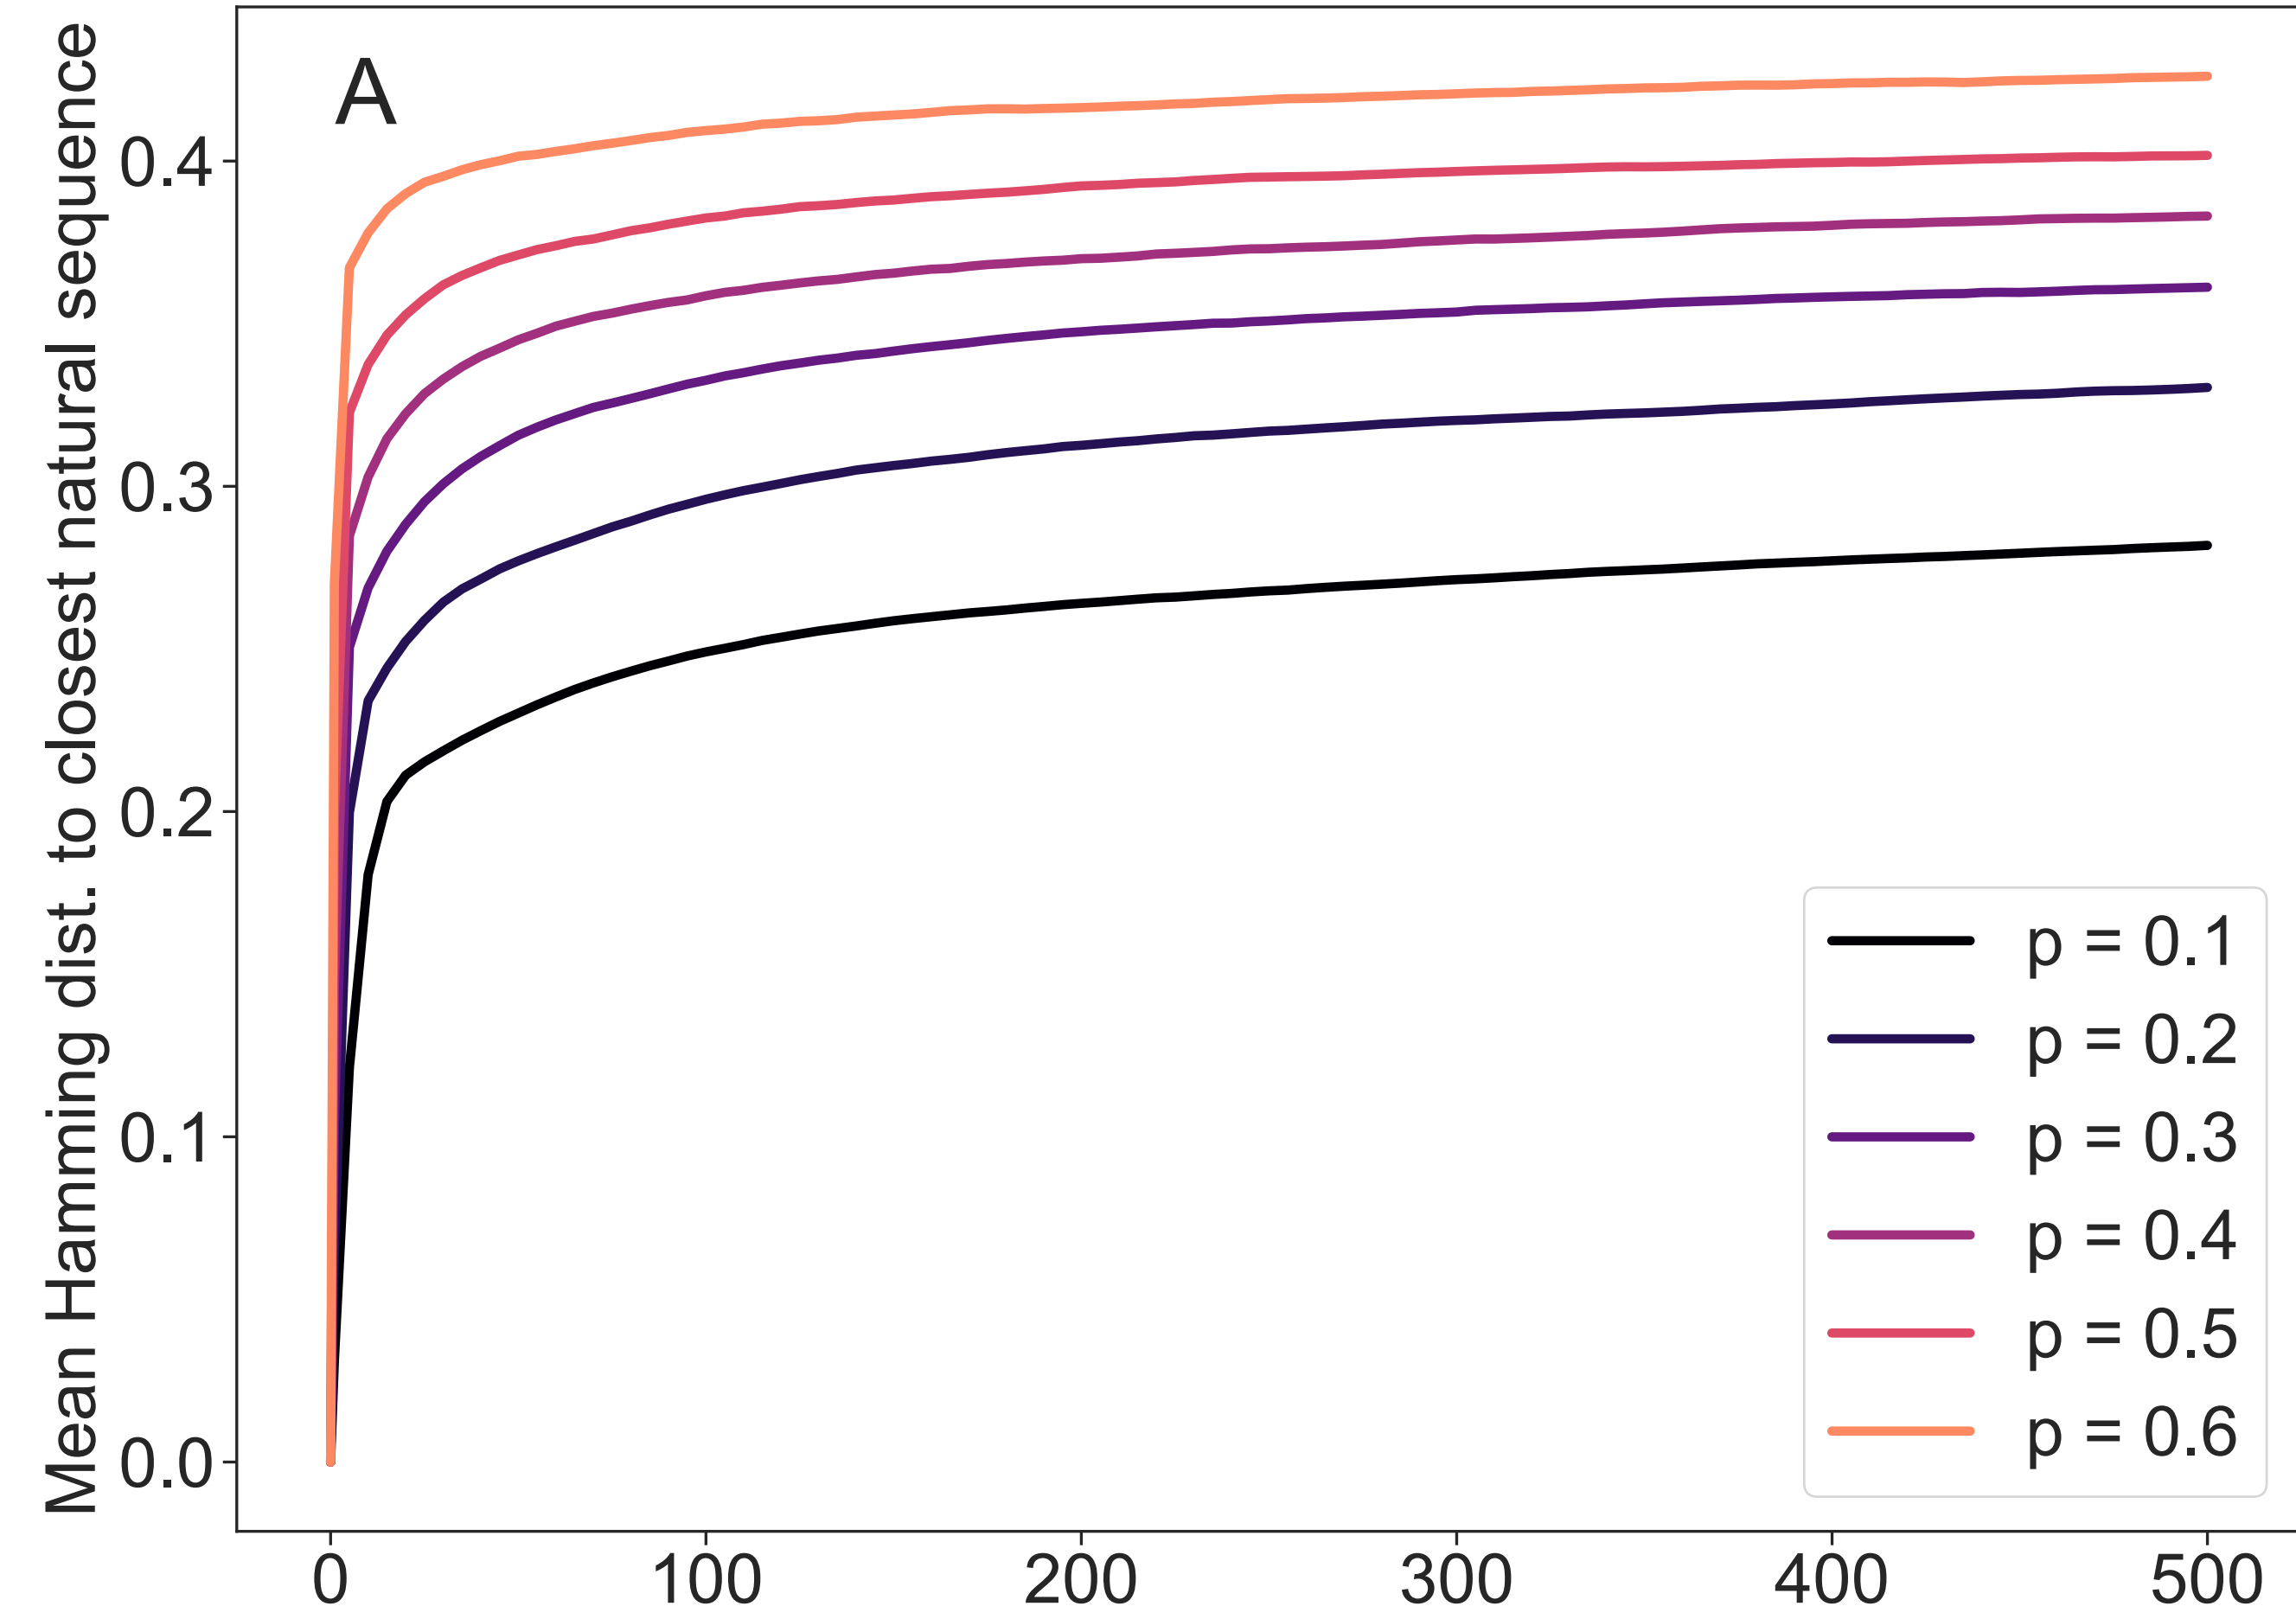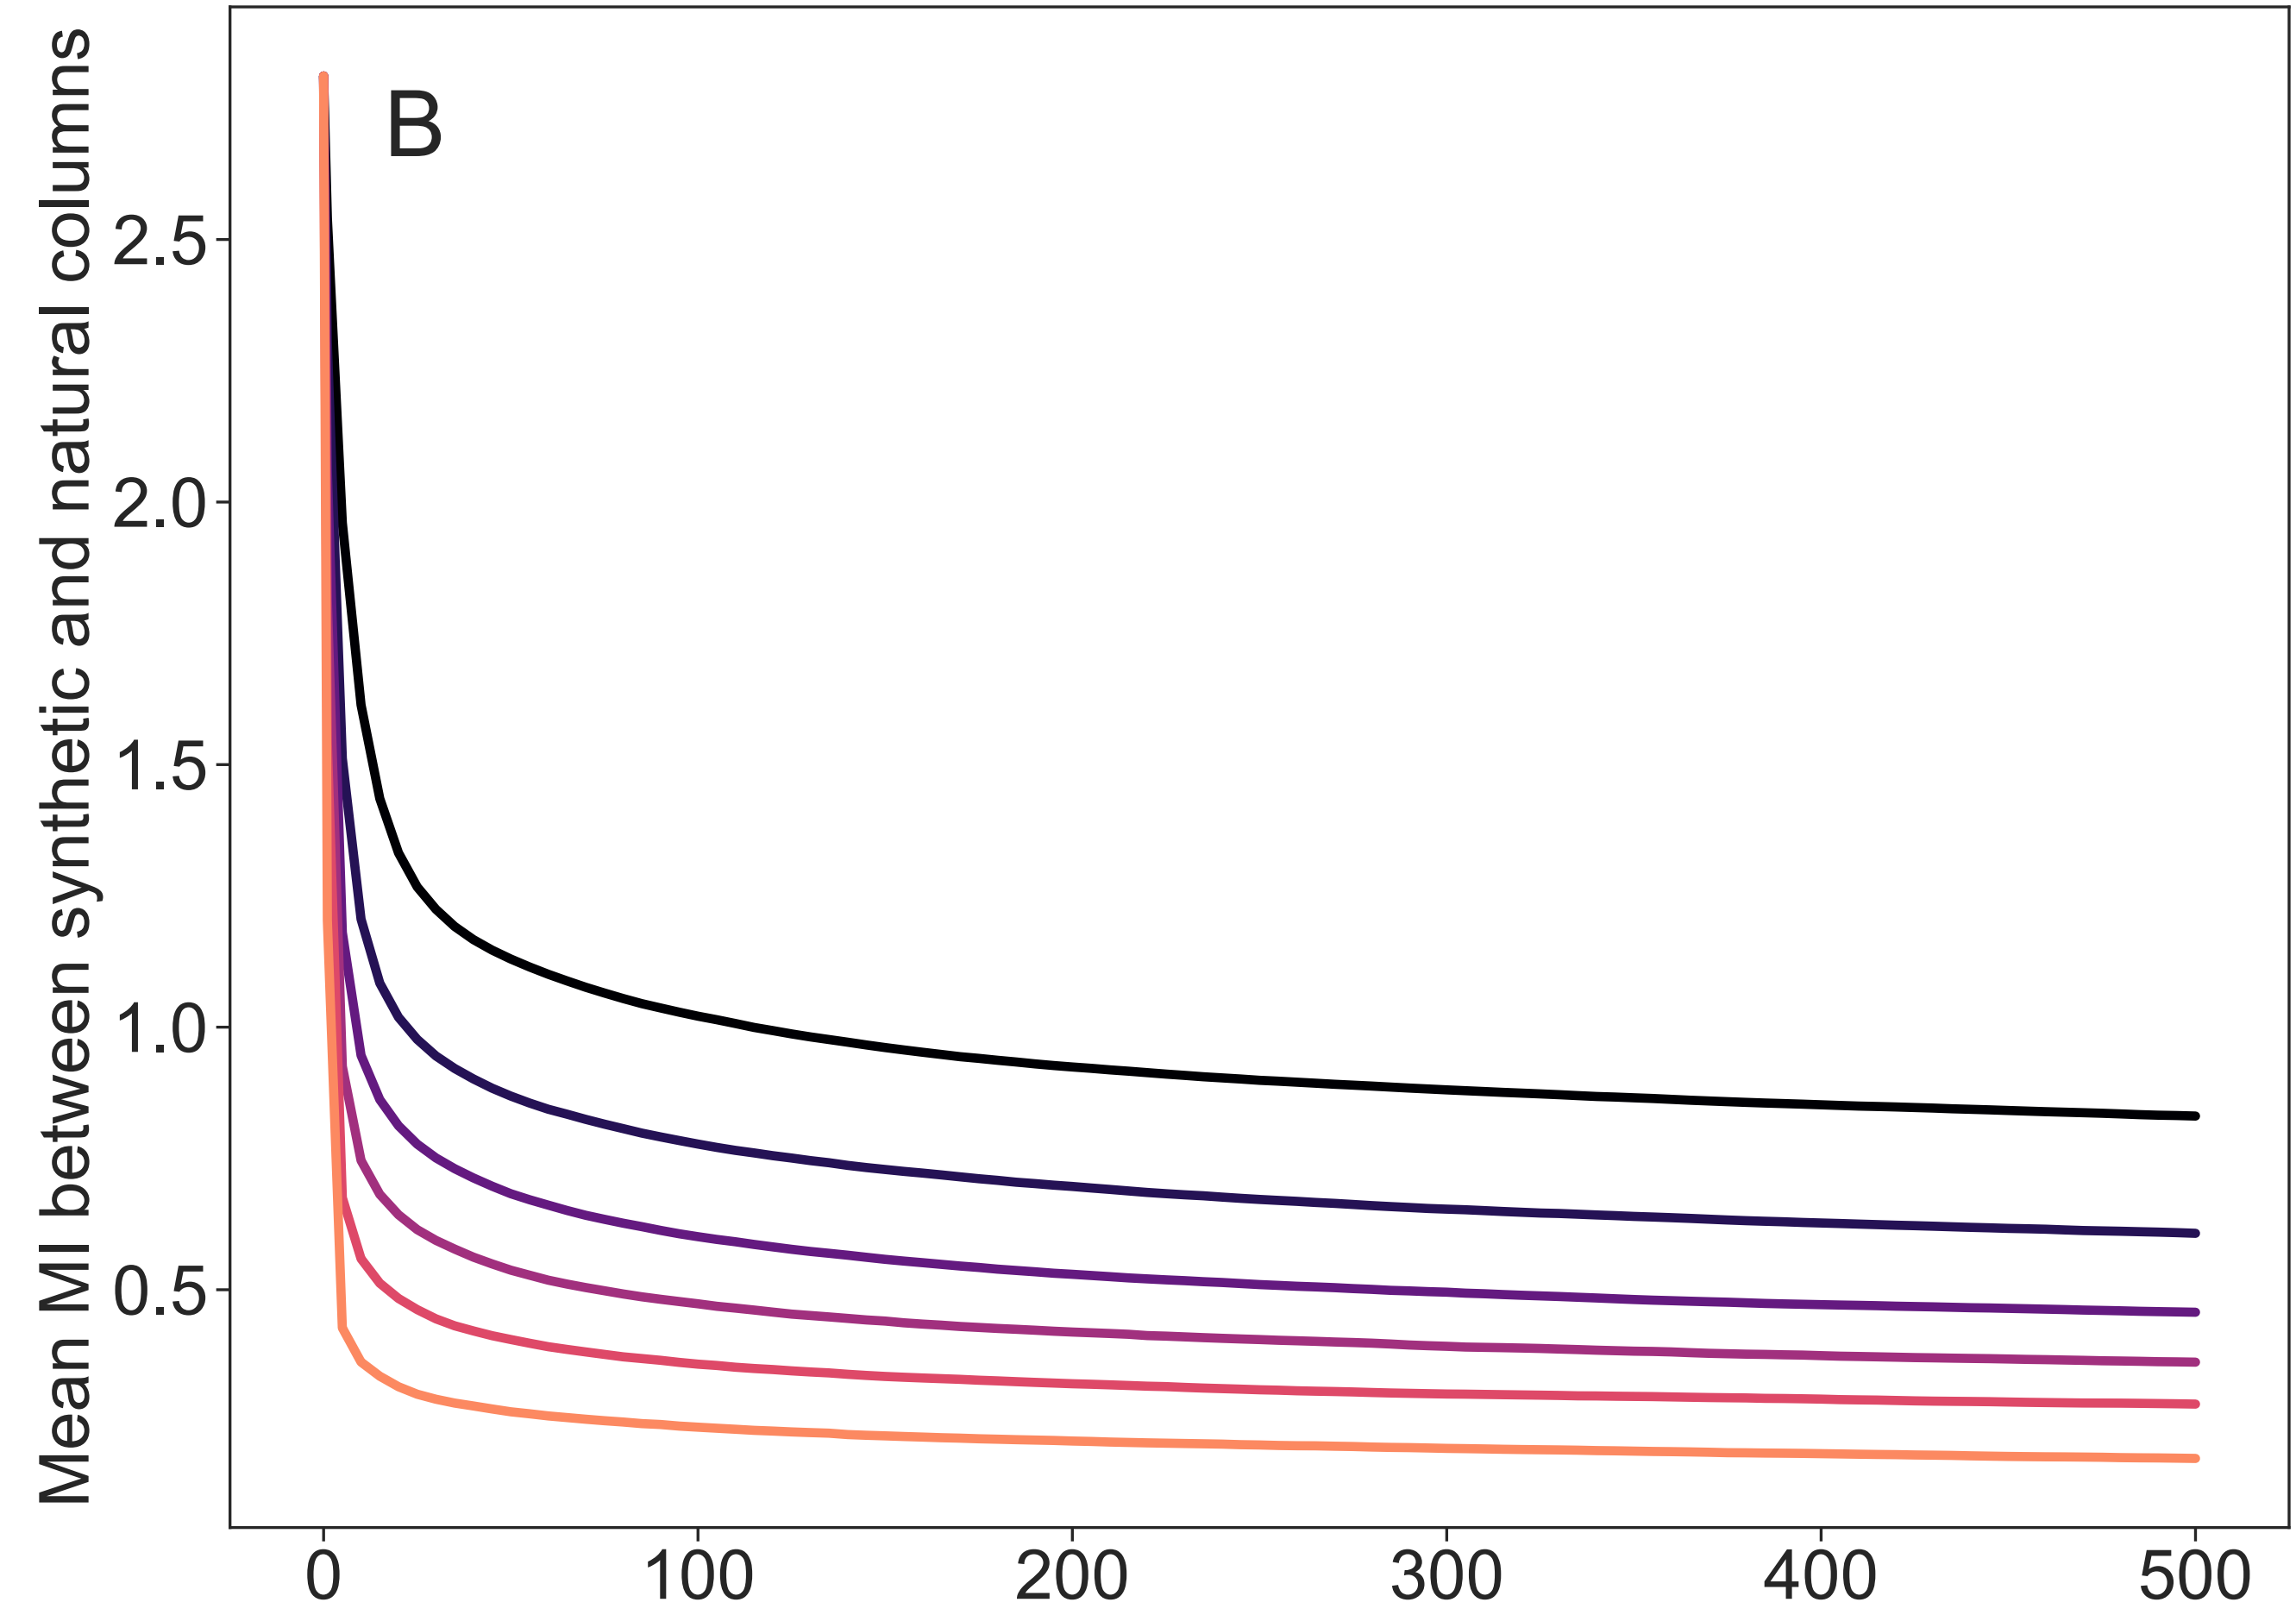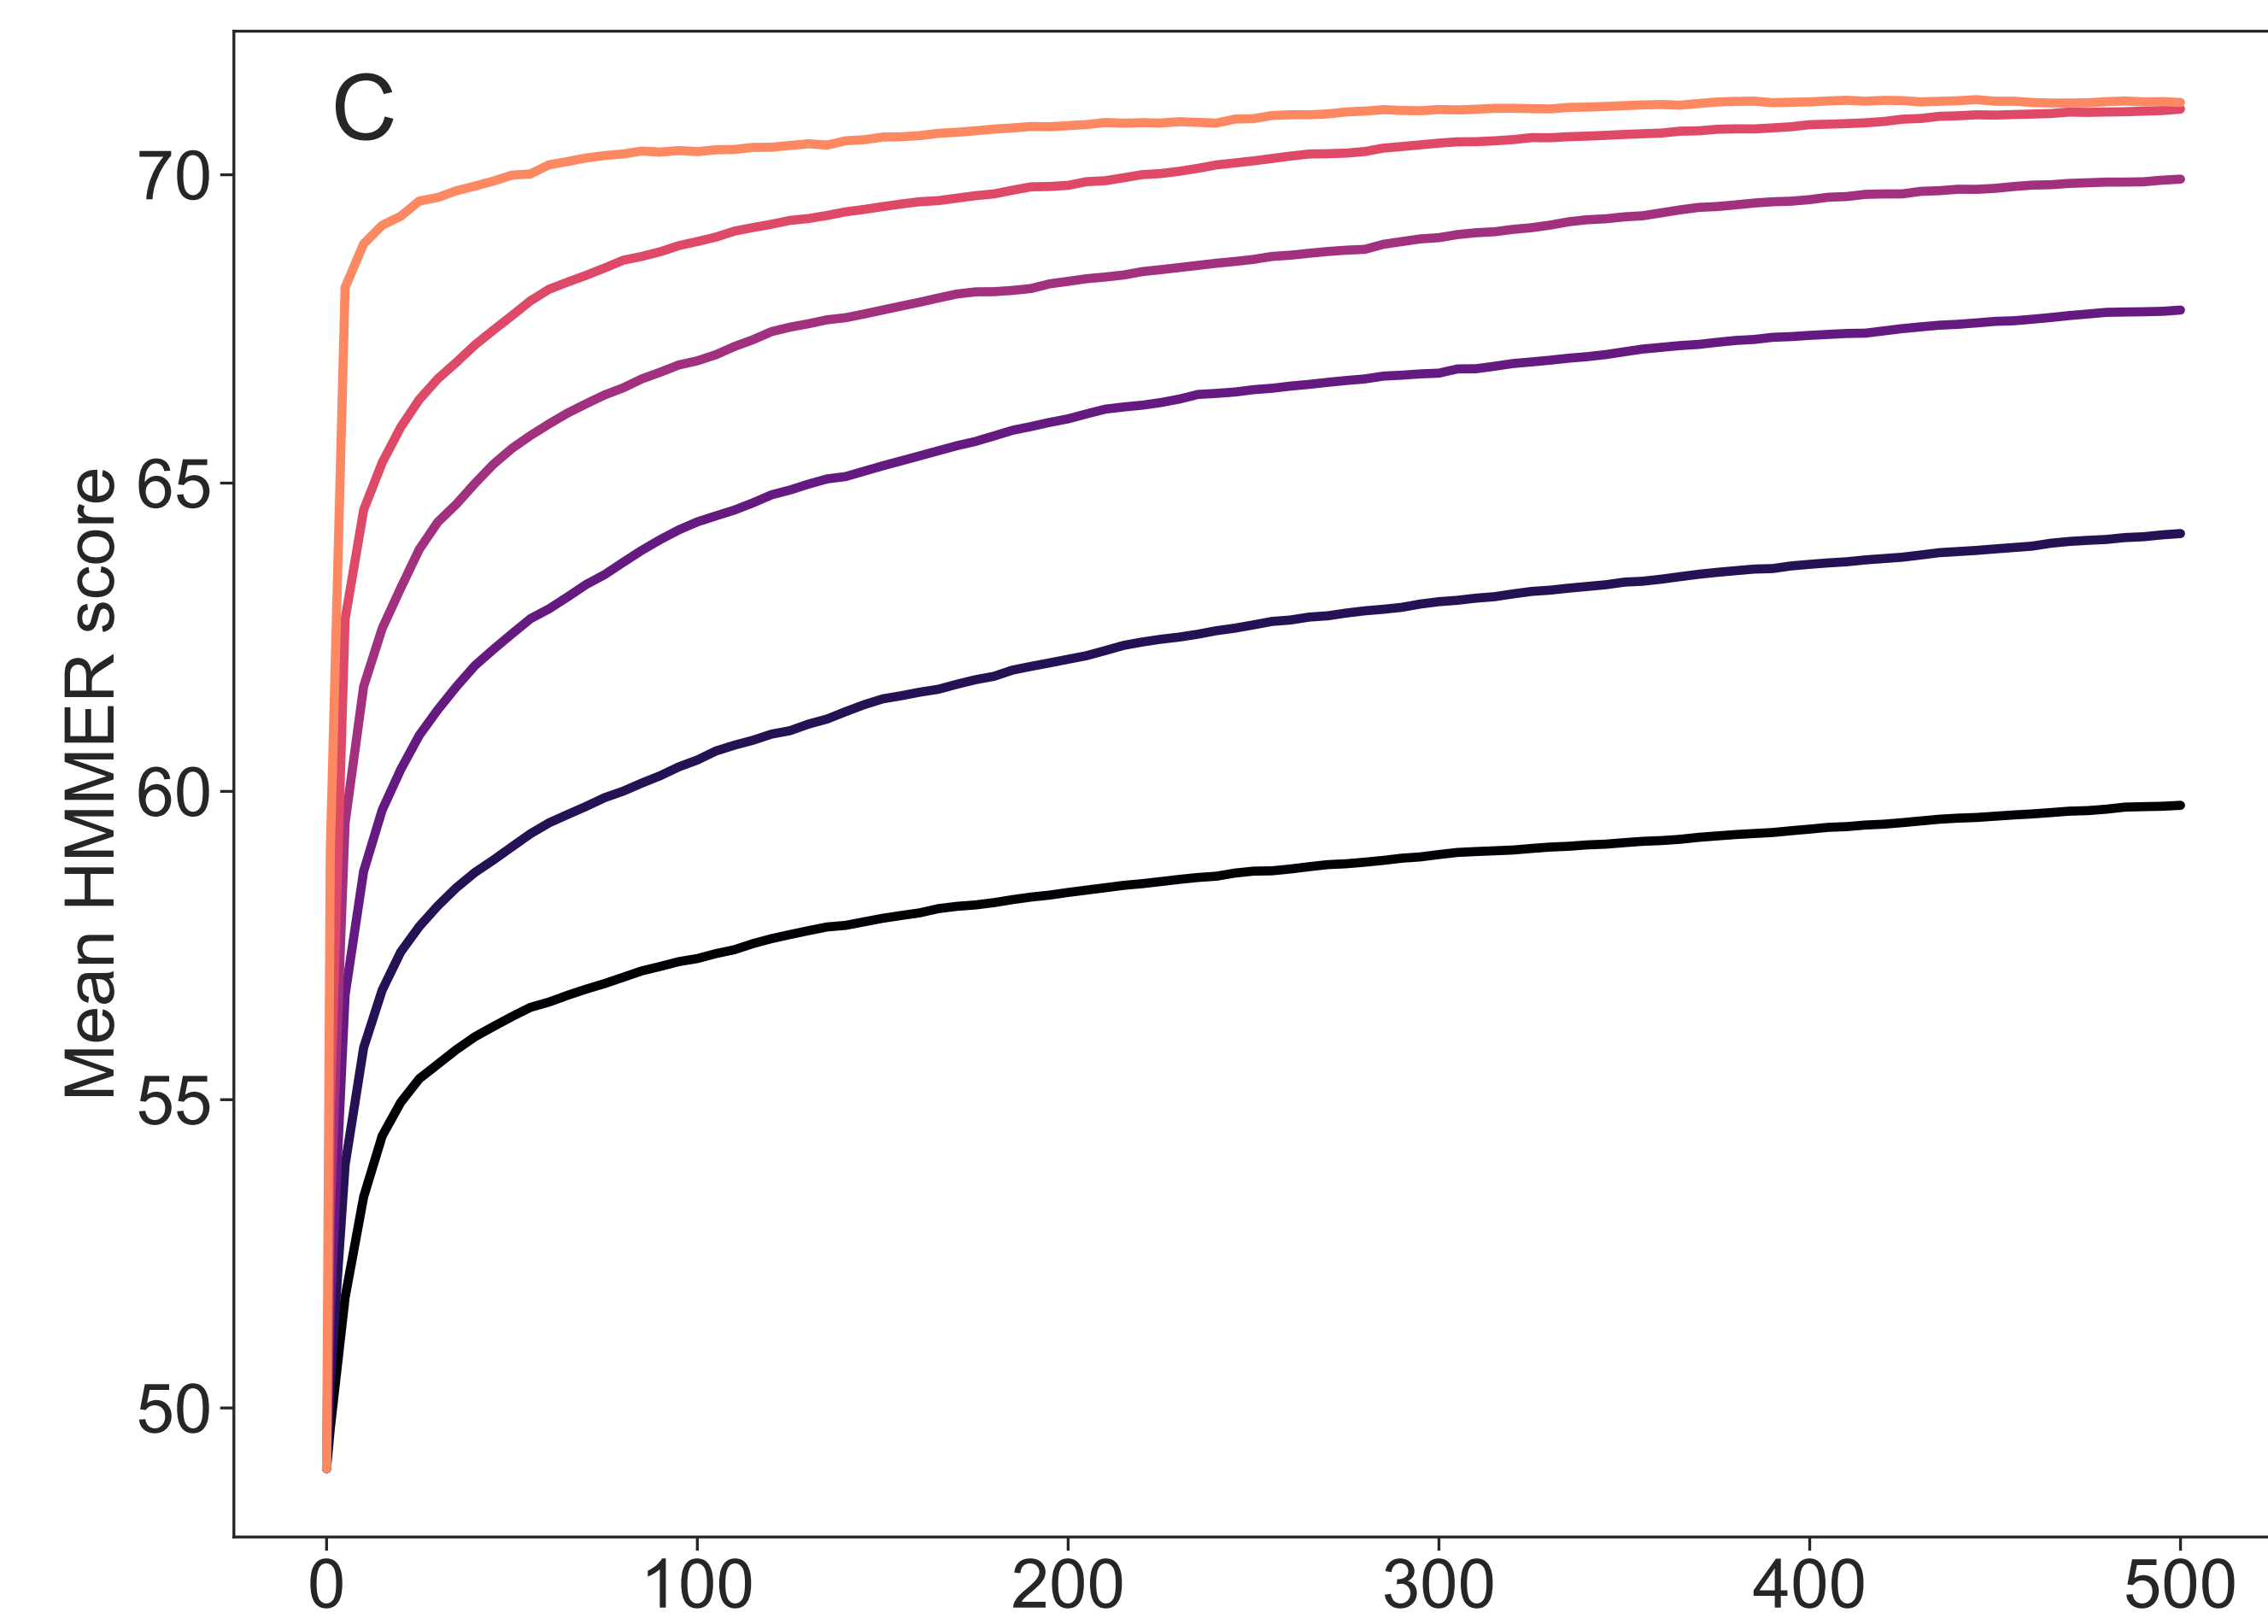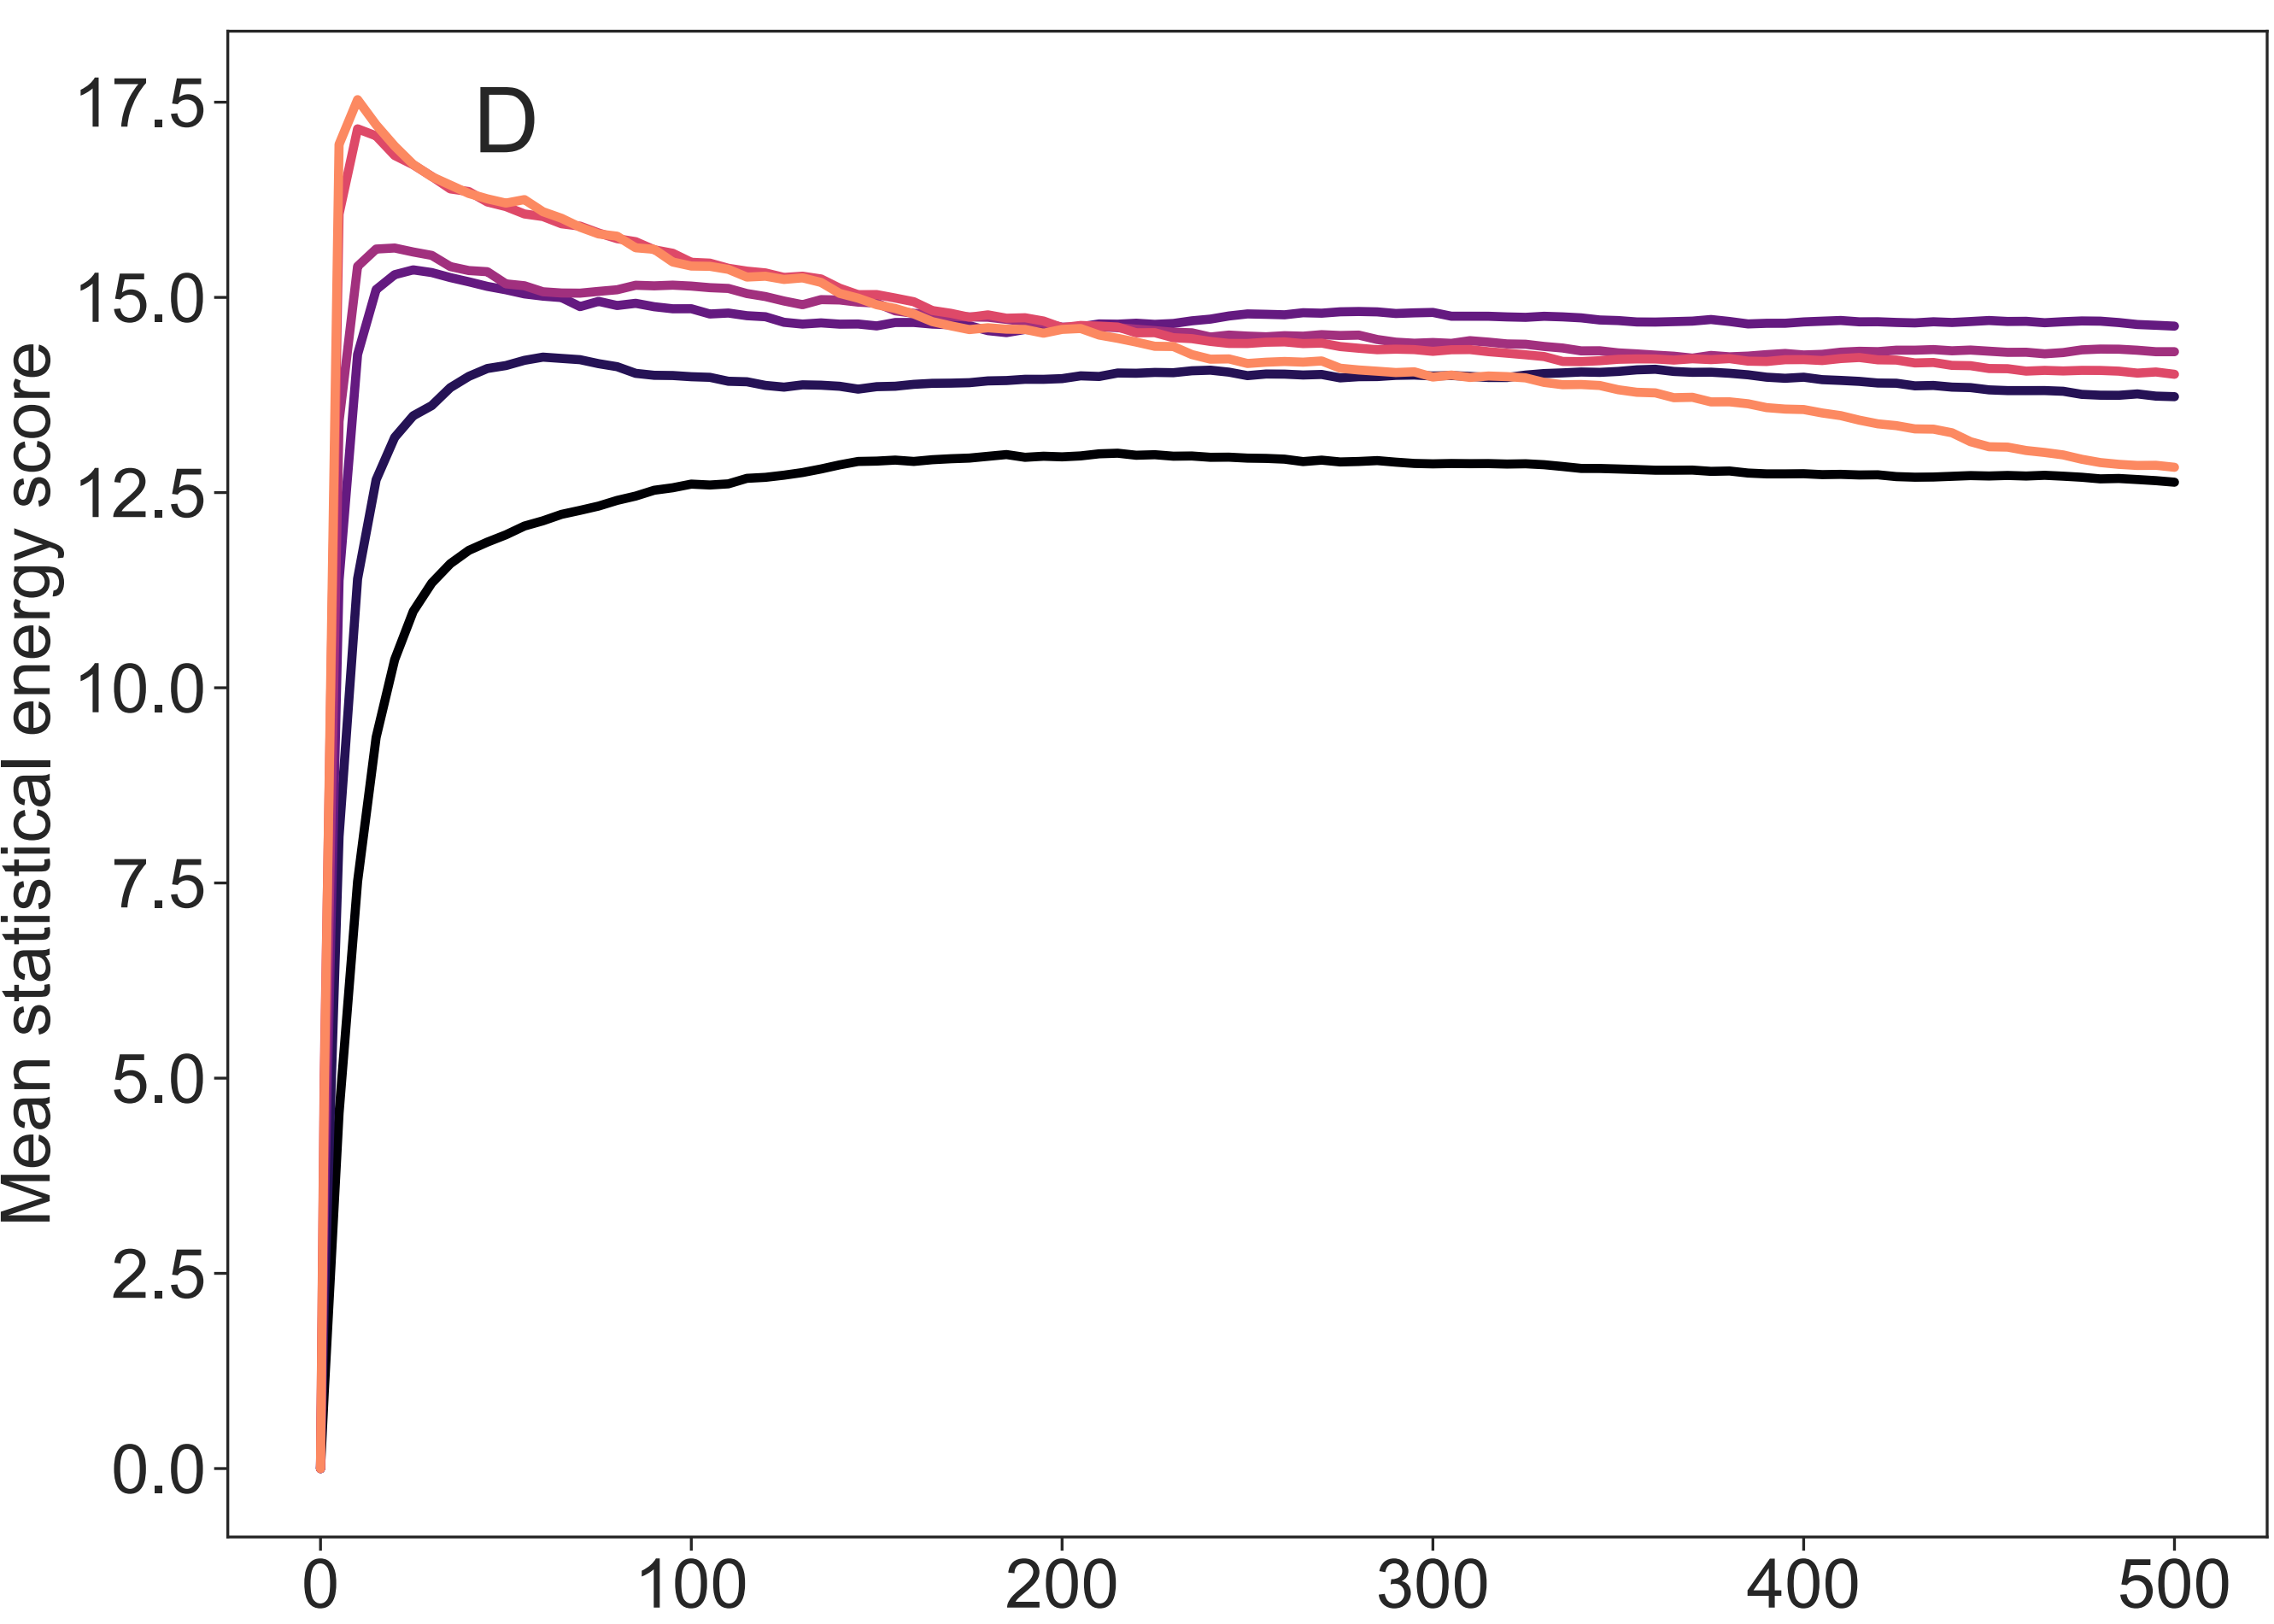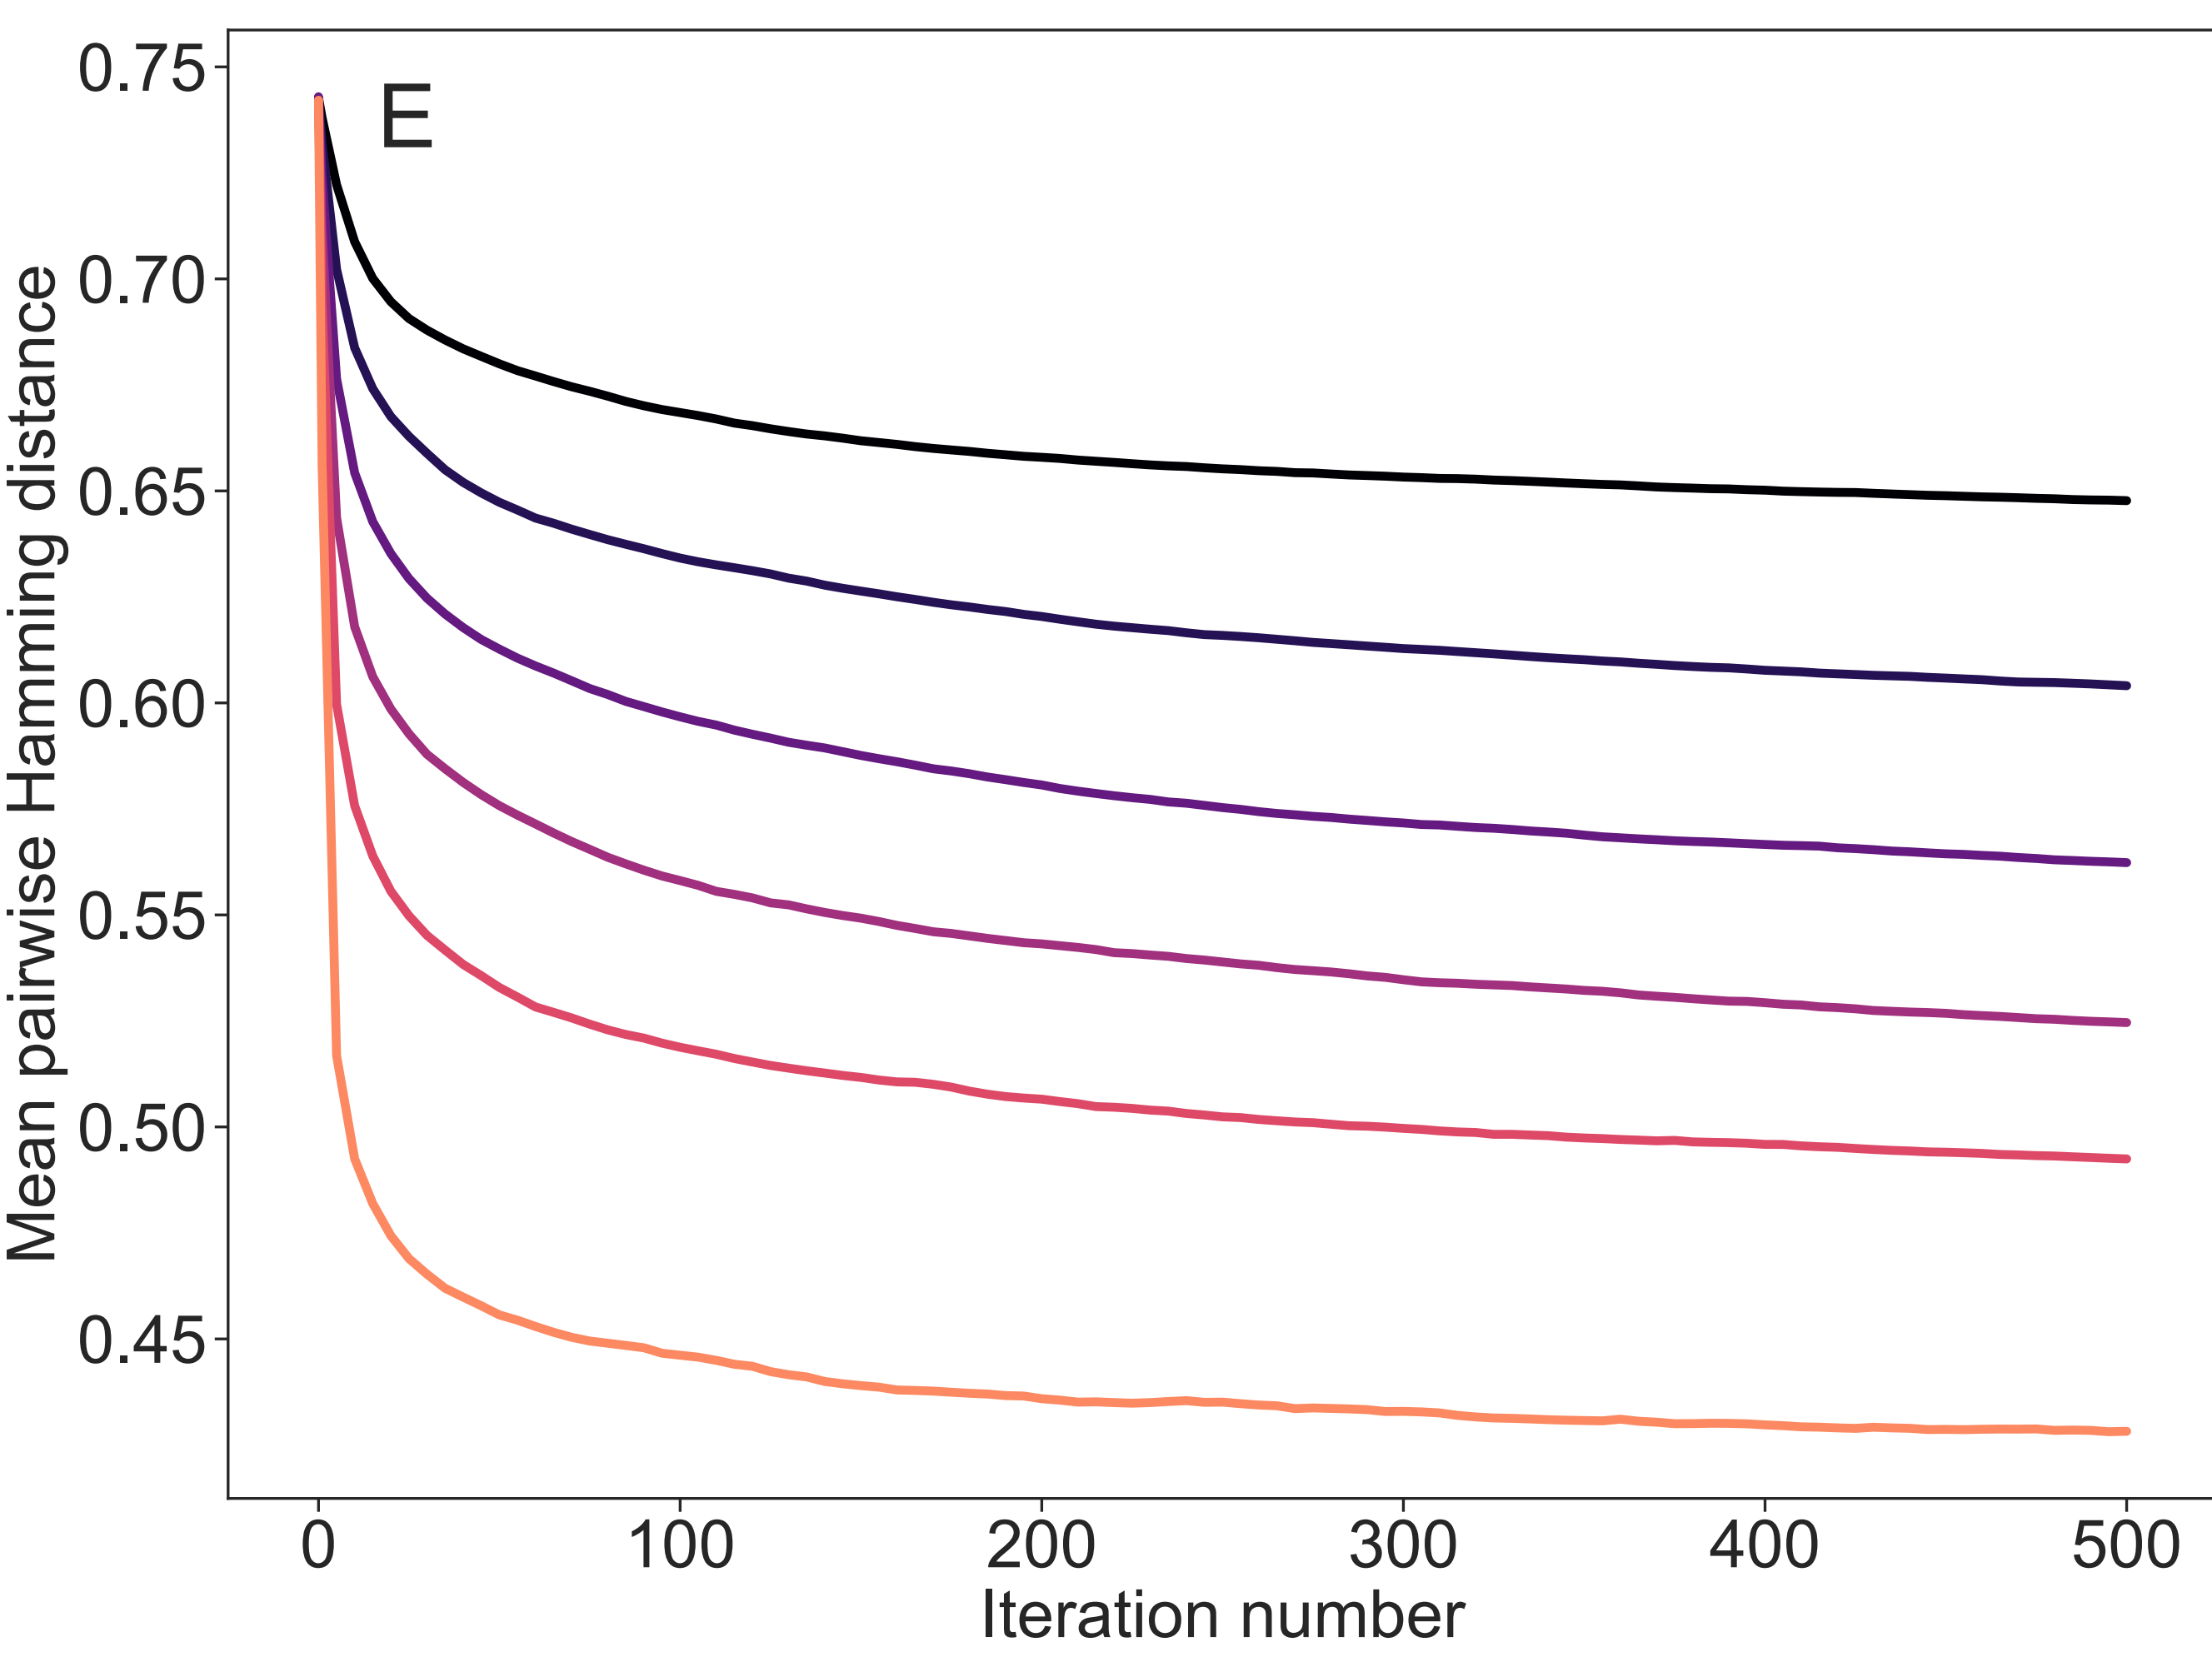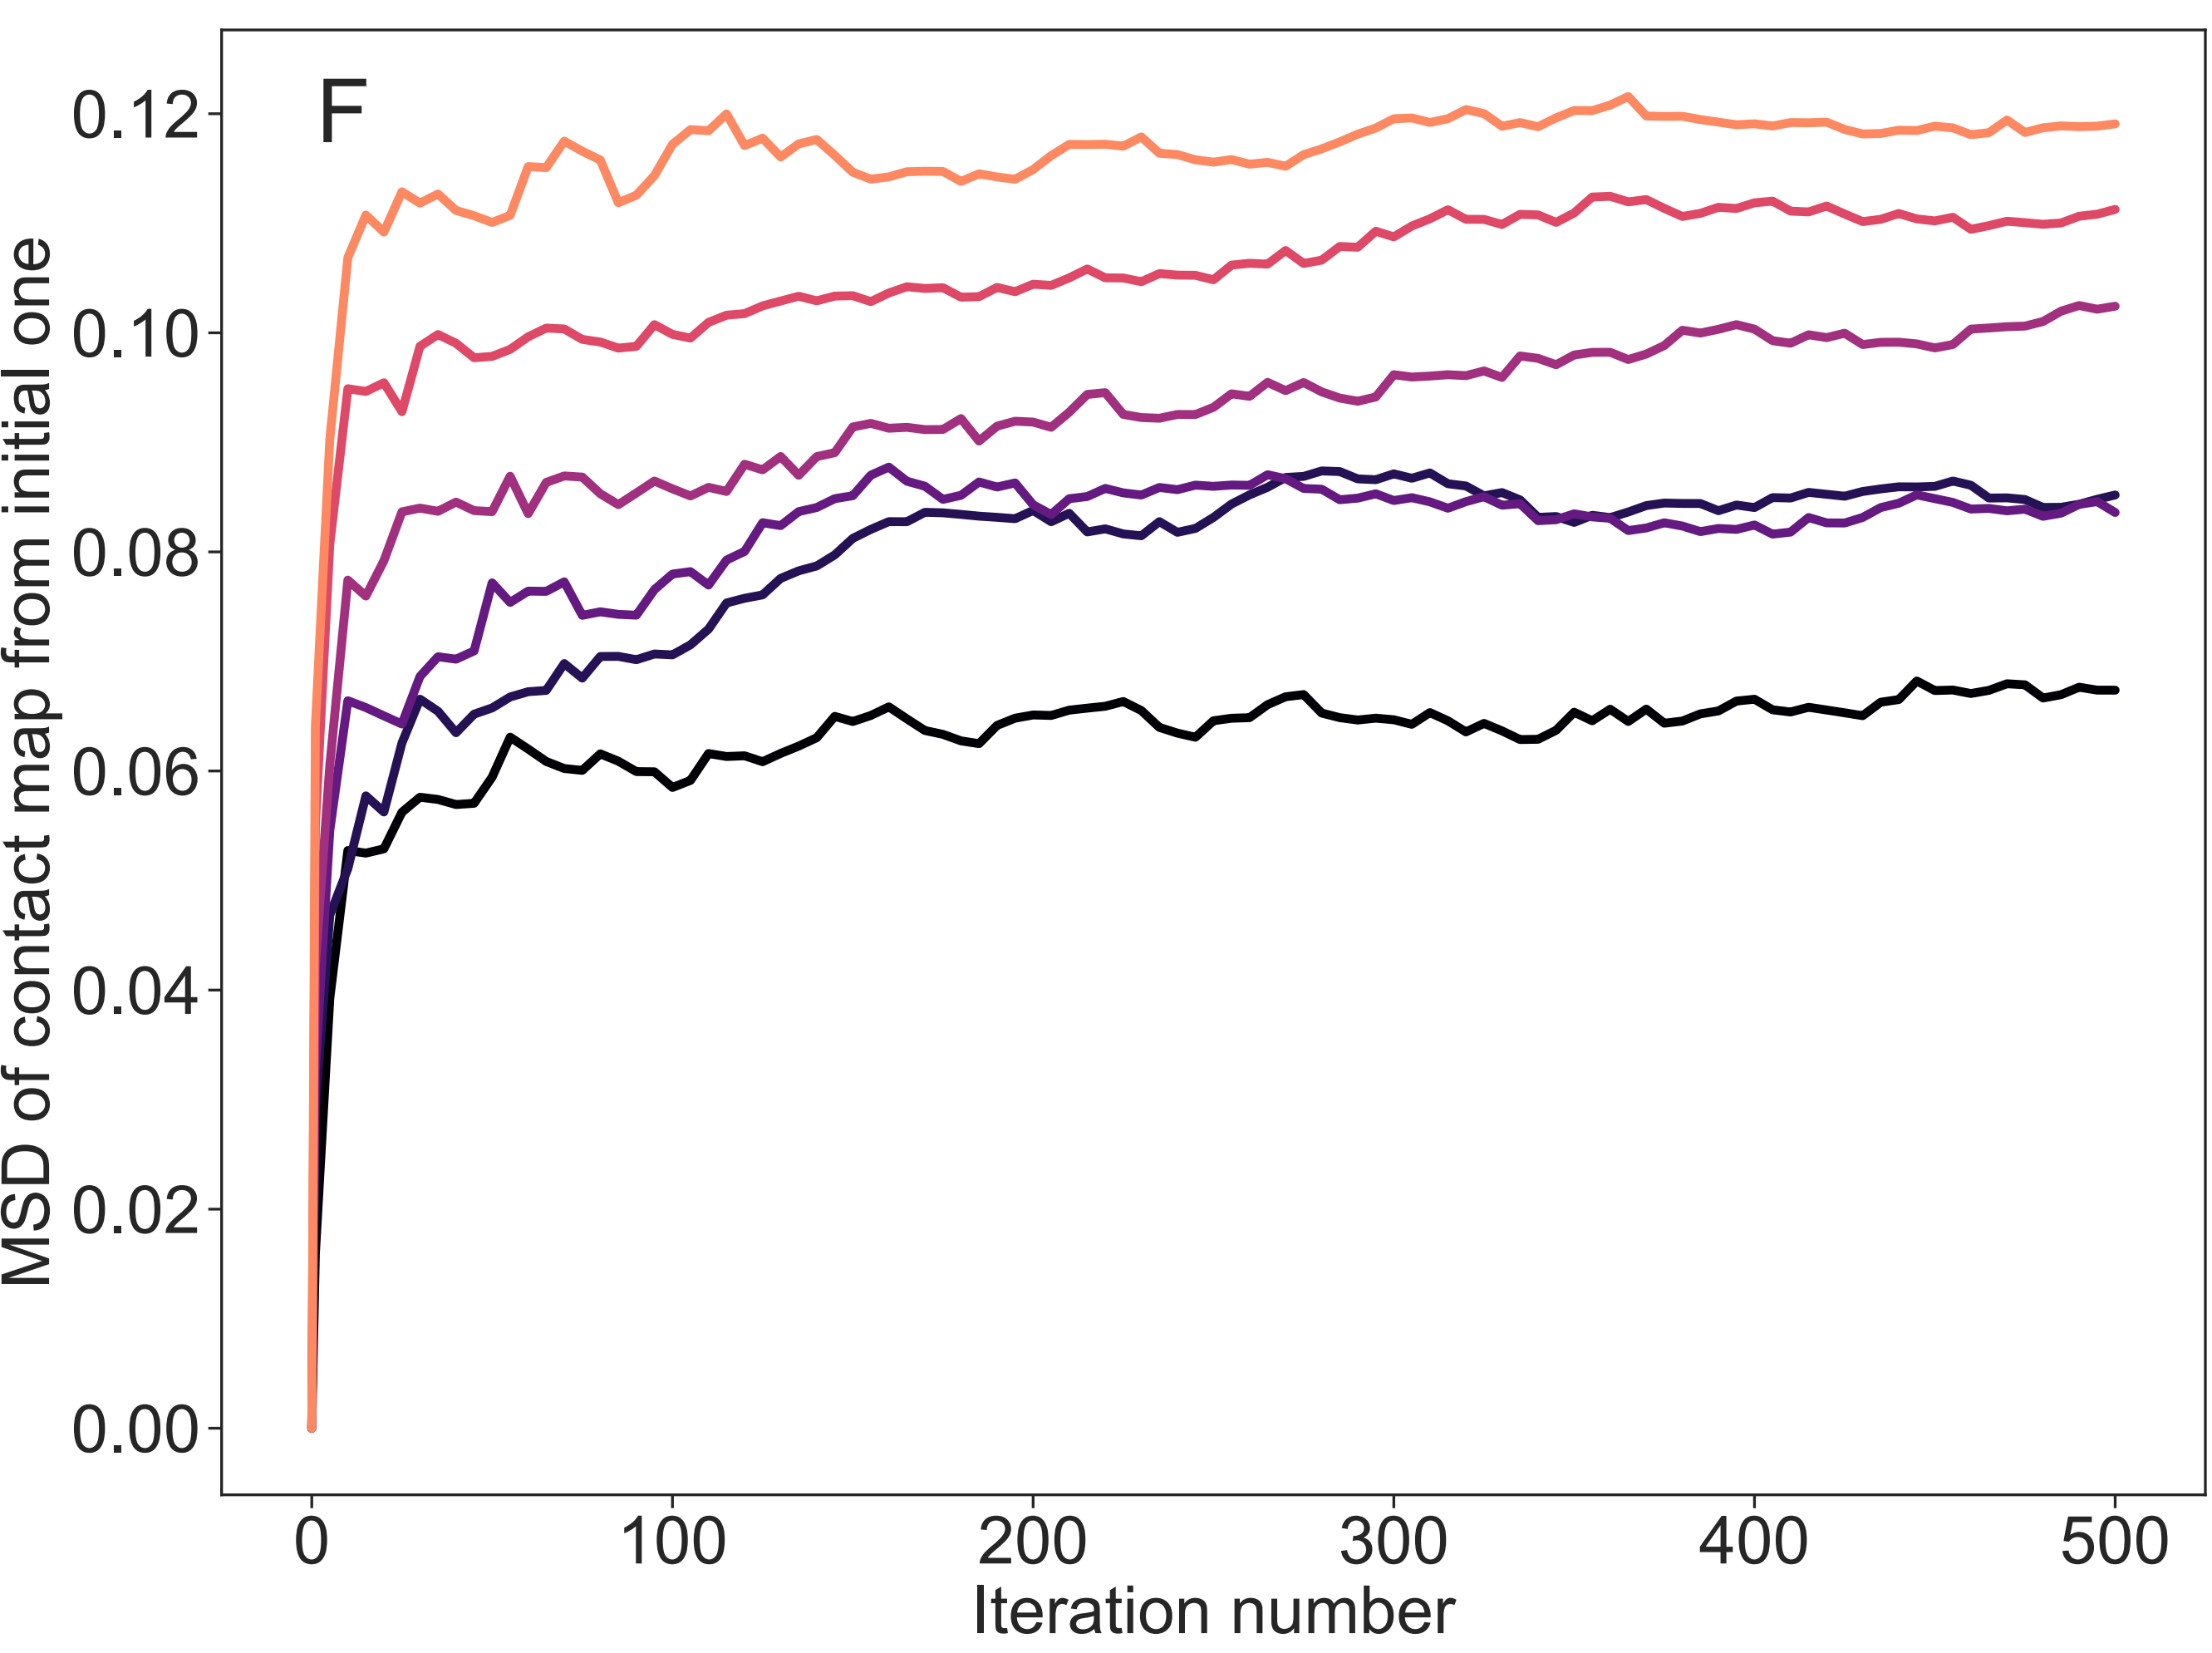

Supplement: supp [file elife-79854-supp-v1.zip]
